# Supplementary material for: Genome-wide identification of tandem repeats associated with splicing variation across 49 tissues in humans
Source: HighWire-hosted journal article supplement (doi:10.1101/gr.277335.122), 2023-03-01
Supplement: Supplemental_Table_Pointers.docx [file Supplemental_Table_Pointers.docx]

Page 9, line 12

Leveraging our spl-TR catalog, we investigated whether TRs contribute to disease pathomechanisms via in-cis splicing alterations. We examined the overlap between our 9,537 spl-TRs and 52 known loci responsible for repeat expansion diseases (**Supplemental Table S6**), and five of them overlapped (**Supplemental Table S7**).

- Supplemental Table S7 and Supplemental Table S8

Page 9, line 19

The repeat correlated with an intron (Chr19:13208054–13208755) usage in the cerebellum in our catalog (q-value = 5 × 10-7 and nominal P = 2 × 10-11, **Supplemental Table S7**), where Purkinje cells are lost in patients.

- Supplemental Table S8

Page 10, line 15

The repeat size was negatively associated with an intron (Chr5:146878196–146878590) usage in basal ganglia, a brain subregion affected in SCA12 (Choudhury et al. 2018), in our spl-TR catalog (q-value = 0.044 and nominal P = 3 × 10-6; **Supplemental Table S7** and Fig. 4C).

- Supplemental Table S8

Page 10, line 27

DM1 is caused by expansion of a *DMPK* CTG repeat, whose dosage was significantly associated with the reduced usage of an intron (Chr19:45770641–45770970) in skeletal muscle in our catalog (q-value = 0.012 and nominal P = 4 × 10-6, **Supplemental Table S7** and Fig. S7).

- Supplemental Table S8

Page 23, line 14

We surveyed the literature and compiled a list of repeats whose expansion is related to rare diseases (n = 52, **Supplemental Table S6**) (Tang et al. 2017; Yu et al. 2021).

- Supplemental Table S7
