# Supplementary material for: Genome-wide identification of tandem repeats associated with splicing variation across 49 tissues in humans
Source: HighWire-hosted journal article supplement (doi:10.1101/gr.277335.122), 2023-03-01
Supplement: Supplemental_Table_S1.xlsx [file Supplemental_Table_S1.xlsx]

## Sheet: Table S1
Table S1 Summary of spl-TR mapping
GTEx tissue	Sample	Analyzed gene	Analyzed splicing event	cis-sGene (FDR 5%)
Adipose_Subcutaneous	581	12392	99671	2363
Adipose_Visceral_Omentum	469	12691	100790	1822
Adrenal_Gland	233	12413	89182	905
Artery_Aorta	387	12220	96791	1599
Artery_Coronary	213	12834	100274	780
Artery_Tibial	584	11847	94551	2154
Brain_Amygdala	129	12583	75939	261
Brain_Anterior_cingulate_cortex_BA24	147	12975	83457	359
Brain_Caudate_basal_ganglia	194	13062	87937	577
Brain_Cerebellar_Hemisphere	175	12647	108916	879
Brain_Cerebellum	209	12548	108582	1071
Brain_Cortex	205	13013	92262	720
Brain_Frontal_Cortex_BA9	175	13079	89361	536
Brain_Hippocampus	165	12671	79929	392
Brain_Hypothalamus	170	13293	87328	491
Brain_Nucleus_accumbens_basal_ganglia	202	13177	90126	646
Brain_Putamen_basal_ganglia	170	12427	78604	419
Brain_Spinal_cord_cervical_c-1	126	12772	84198	387
Brain_Substantia_nigra	114	12474	74538	204
Breast_Mammary_Tissue	396	13303	107472	1717
Cells_Cultured_fibroblasts	483	11338	88199	2147
Cells_EBV-transformed_lymphocytes	147	11529	100585	707
Colon_Sigmoid	318	12550	98685	1366
Colon_Transverse	368	13235	100875	1386
Esophagus_Gastroesophageal_Junction	330	12281	95355	1374
Esophagus_Mucosa	497	12014	88683	1714
Esophagus_Muscularis	465	12063	92961	1842
Heart_Atrial_Appendage	372	12173	90500	1275
Heart_Left_Ventricle	386	11164	75067	945
Kidney_Cortex	73	12188	79208	95
Liver	208	11049	69303	569
Lung	515	13294	108478	2095
Minor_Salivary_Gland	144	13346	100097	476
Muscle_Skeletal	706	10488	77622	2000
Nerve_Tibial	532	12754	105781	2445
Ovary	167	12713	103396	659
Pancreas	305	11279	75361	824
Pituitary	237	13691	107395	1175
Prostate	221	13510	102785	916
Skin_Not_Sun_Exposed_Suprapubic	517	12629	100427	2062
Skin_Sun_Exposed_Lower_leg	605	12584	99163	2350
Small_Intestine_Terminal_Ileum	174	13721	110203	677
Spleen	227	12767	98895	1005
Stomach	324	12646	91584	957
Testis	322	19027	188396	4164
Thyroid	574	12801	103242	2586
Uterus	129	12800	101770	402
Vagina	141	13292	101323	463
Whole_Blood	670	9585	65801	1332
