# Supplementary material for: Genome-wide identification of tandem repeats associated with splicing variation across 49 tissues in humans
Source: HighWire-hosted journal article supplement (doi:10.1101/gr.277335.122), 2023-03-01
Supplement: Supplemental_Table_S2.xlsx [file Supplemental_Table_S2.xlsx]

## Sheet: Table S2
Table S2 Results of ANOVA comparing regression models with or without nearby variants
Splicing							Tandem repeat				P-value	Number of tests for the splicing	Adjusted p-value for the number of tests	Q-value
Chr	Start	End	Tissue	Gene name	Gene ID		Chr	Start	End	Motif (sense strand)
chr2	27299416	27299530	Muscle_Skeletal	TRIM54	ENSG00000138100.13		chr2	27299676	27299715	ATCT	4.96098e-24	4	1.98439e-23	4.56608e-20
chr19	16065755	16066105	Testis	LINC01855	ENSG00000267517.1		chr19	16066037	16066072	GT	1.69823e-18	1	1.69823e-18	1.95382e-15
chr4	173388395	173391173	Artery_Aorta	SCRG1	ENSG00000164106.7		chr4	173389537	173389572	GTTT	3.08362e-08	19	5.85887e-07	0.000402503
chr11	78559619	78566132	Thyroid	NARS2	ENSG00000137513.9		chr11	78562032	78562066	GTTTTTT	6.997e-07	1	6.997e-07	0.000402503
chr16	8772917	8774890	Brain_Cortex	ABAT	ENSG00000183044.11		chr16	8775566	8775583	AC	4.44142e-07	7	3.109e-06	0.00143076
chr10	121836817	121841082	Pancreas	ATE1	ENSG00000107669.17		chr10	121846701	121846744	ATTT	8.61595e-06	1	8.61595e-06	0.00330422
chr8	143267484	143274704	Breast_Mammary_Tissue	ZFP41	ENSG00000181638.17		chr8	143268839	143268859	CTG	5.79257e-07	28	1.62192e-05	0.00466505
chr8	143267484	143274704	Breast_Mammary_Tissue	GLI4	ENSG00000250571.6		chr8	143268839	143268859	CTG	5.79257e-07	28	1.62192e-05	0.00466505
chr21	42554142	42558958	Brain_Cerebellum	SLC37A1	ENSG00000160190.13		chr21	42551805	42551834	GTTTT	9.18978e-06	3	2.75693e-05	0.00704856
chr7	7640821	7673309	Thyroid	UMAD1	ENSG00000219545.11		chr7	7673311	7673370	AGC	9.2624e-06	6	5.55744e-05	0.0127877
chr12	50112903	50120036	Stomach	RP4-605O3.4	ENSG00000272368.2		chr12	50112908	50112947	ATGTT	3.82592e-06	18	6.88666e-05	0.0144056
chr12	50112903	50120036	Stomach	COX14	ENSG00000178449.8		chr12	50112908	50112947	ATGTT	3.82592e-06	20	7.65185e-05	0.0146724
chr1	31579267	31580288	Thyroid	TINAGL1	ENSG00000142910.15		chr1	31580064	31580085	GT	2.50312e-05	6	0.000150187	0.0265832
chr5	159614595	159619344	Testis	AC008697.1	ENSG00000249738.8		chr5	159613832	159613847	ATTT	0.000163482	1	0.000163482	0.0268694
chr1	54216344	54225125	Artery_Tibial	MRPL37	ENSG00000116221.15		chr1	54206906	54206925	GT	7.00589e-06	49	0.000343289	0.0483172
chr7	122393315	122393441	Heart_Left_Ventricle	CADPS2	ENSG00000081803.15		chr7	122398739	122398764	CT	8.9243e-05	4	0.000356972	0.0483172
chr22	29297949	29298733	Cells_Cultured_fibroblasts	EWSR1	ENSG00000182944.17		chr22	29303765	29303810	GT	0.000325934	1	0.000325934	0.0483172
chr7	150628288	150630058	Adipose_Subcutaneous	GIMAP6	ENSG00000133561.15		chr7	150637116	150637135	AC	0.00043849	1	0.00043849	0.0560537
chr2	25930063	25951789	Small_Intestine_Terminal_Ileum	KIF3C	ENSG00000084731.14		chr2	25932834	25932883	GTTTT	0.000489705	1	0.000489705	0.0593059
chr8	142982501	143012485	Brain_Caudate_basal_ganglia	RP11-273G15.2	ENSG00000247317.3		chr8	143011544	143011573	AAT	3.03993e-05	20	0.000607986	0.0641178
chr16	87298962	87302653	Testis	RP11-178L8.5	ENSG00000261697.5		chr16	87308477	87308520	ATTT	0.000593868	1	0.000593868	0.0641178
chr4	101347835	101348324	Adipose_Subcutaneous	FLJ20021	ENSG00000254531.1		chr4	101353911	101353932	AC	0.000613034	1	0.000613034	0.0641178
chr8	124942724	124950816	Testis	LINC00964	ENSG00000249816.6		chr8	124957212	124957251	GT	0.000505245	2	0.00101049	0.100439
chr13	97357635	97366459	Colon_Transverse	MBNL2	ENSG00000139793.18		chr13	97368413	97368437	AAAAT	0.00107058	1	0.00107058	0.100439
chr9	18574266	18622243	Cells_Cultured_fibroblasts	ADAMTSL1	ENSG00000178031.16		chr9	18621557	18621600	AC	0.00109125	1	0.00109125	0.100439
chr11	66259842	66261725	Testis	RP11-755F10.3	ENSG00000254461.1		chr11	66270236	66270277	AAC	0.0013849	1	0.0013849	0.122564
chr20	38326432	38334430	Whole_Blood	BPI	ENSG00000101425.12		chr20	38329006	38329033	AAAT	0.000751041	2	0.00150208	0.126677
chr10	96656934	96700803	Cells_EBV-transformed_lymphocytes	PIK3AP1	ENSG00000155629.14		chr10	96710214	96710237	AAAT	0.00154148	1	0.00154148	0.126677
chr13	52442445	52450499	Colon_Sigmoid	VPS36	ENSG00000136100.12		chr13	52455636	52455671	CGGTGG	0.000347826	5	0.00173913	0.137275
chr6	131576735	131579111	Whole_Blood	ARG1	ENSG00000118520.14		chr6	131584364	131584397	GT	0.00178977	1	0.00178977	0.137275
chr12	6914659	6915436	Artery_Tibial	ENO2	ENSG00000111674.8		chr12	6923289	6923308	ATTT	0.00186751	1	0.00186751	0.138618
chr14	22883390	22884674	Whole_Blood	REM2	ENSG00000139890.9		chr14	22883256	22883285	ACACGC	0.0010786	2	0.00215721	0.155117
chr7	116904383	116906263	Lung	CAPZA2	ENSG00000198898.13		chr7	116903234	116903271	GT	0.0025057	1	0.0025057	0.174715
chr20	20025767	20026784	Muscle_Skeletal	NAA20	ENSG00000173418.11		chr20	20029882	20029906	GTTTT	0.00261421	1	0.00261421	0.17692
chr5	151674671	151676132	Adipose_Visceral_Omentum	SPARC	ENSG00000113140.10		chr5	151673967	151674008	AC	0.000134153	21	0.00281721	0.1832
chr15	33772158	33773534	Colon_Sigmoid	RYR3	ENSG00000198838.13		chr15	33772297	33772320	AAG	0.00286624	1	0.00286624	0.1832
chr4	79195896	79306691	Artery_Tibial	LINC01088	ENSG00000249307.5		chr4	79204929	79204956	AC	0.00153845	2	0.00307691	0.191351
chr15	51458053	51460298	Brain_Frontal_Cortex_BA9	RP11-707P17.2	ENSG00000259668.5		chr15	51458895	51458918	AGC	0.000191368	17	0.00325325	0.196993
chr7	64543802	64562925	Adipose_Subcutaneous	ZNF680	ENSG00000173041.11		chr7	64544440	64544471	GT	0.000245854	14	0.00344196	0.20202
chr19	36151755	36152393	Adipose_Subcutaneous	COX7A1	ENSG00000161281.10		chr19	36152531	36152554	AGCCCC	0.000329582	11	0.0036254	0.20202
chr15	80098578	80111428	Testis	ZFAND6	ENSG00000086666.18		chr15	80091161	80091186	GT	0.00355645	1	0.00355645	0.20202
chr21	14486114	14498442	Whole_Blood	SAMSN1	ENSG00000155307.17		chr21	14493575	14493612	GT	0.00368746	1	0.00368746	0.20202
chr5	74726126	74730260	Whole_Blood	GFM2	ENSG00000164347.17		chr5	74732928	74732979	GT	0.00413953	1	0.00413953	0.218959
chr11	16871182	16925526	Esophagus_Mucosa	PLEKHA7	ENSG00000166689.15		chr11	16891071	16891090	AATAG	0.00425334	1	0.00425334	0.218959
chr9	70088494	70113732	Pituitary	MAMDC2-AS1	ENSG00000204706.14		chr9	70118298	70118347	AC	0.00428213	1	0.00428213	0.218959
chr1	234959916	234961417	Lung	RP11-443B7.3	ENSG00000258082.1		chr1	234964656	234964677	GT	0.00111972	4	0.00447889	0.224042
chr14	50792881	50794436	Stomach	NIN	ENSG00000100503.23		chr14	50791808	50791839	GT	0.00245117	2	0.00490234	0.228906
chr10	97396301	97400305	Cells_Cultured_fibroblasts	RRP12	ENSG00000052749.13		chr10	97404753	97404776	ATCT	0.00474478	1	0.00474478	0.228906
chr2	143519364	143556408	Testis	ARHGAP15	ENSG00000075884.13		chr2	143555861	143555925	AATAG	0.00489665	1	0.00489665	0.228906
chr8	9008148	9011542	Cells_Cultured_fibroblasts	ERI1	ENSG00000104626.14		chr8	8999119	8999142	AAAT	0.00497406	1	0.00497406	0.228906
chr20	9516361	9529642	Brain_Caudate_basal_ganglia	LAMP5	ENSG00000125869.9		chr20	9517622	9517635	GT	0.00169322	3	0.00507966	0.229182
chr5	148410765	148414136	Adipose_Subcutaneous	FBXO38	ENSG00000145868.16		chr5	148422952	148422987	GTTT	0.00530392	1	0.00530392	0.234698
chr19	5990061	6012120	Brain_Frontal_Cortex_BA9	CTC-232P5.1	ENSG00000266983.1		chr19	5990542	5990556	CGGGG	0.00548474	1	0.00548474	0.238121
chr7	100779750	100784623	Testis	ZAN	ENSG00000146839.18		chr7	100774921	100774944	GTTT	0.0066658	1	0.0066658	0.284037
chr4	158697699	158703423	Muscle_Skeletal	ETFDH	ENSG00000171503.11		chr4	158709020	158709057	GT	0.00038727	22	0.00851995	0.296098
chr6	150905761	150918577	Pancreas	MTHFD1L	ENSG00000120254.15		chr6	150898828	150898848	ATT	0.000690434	12	0.0082852	0.296098
chr17	42308333	42310507	Adipose_Subcutaneous	STAT5A	ENSG00000126561.16		chr17	42310779	42310800	GT	0.00111905	8	0.0089524	0.296098
chr1	234959916	234961417	Lung	RP11-443B7.1	ENSG00000238005.2		chr1	234964656	234964677	GT	0.00111972	7	0.00783806	0.296098
chr6	32974765	32975384	Skin_Not_Sun_Exposed_Suprapubic	BRD2	ENSG00000204256.12		chr6	32975286	32975309	GT	0.00175126	5	0.00875628	0.296098
chr16	19224838	19266880	Cells_EBV-transformed_lymphocytes	SYT17	ENSG00000103528.16		chr16	19250360	19250403	GT	0.0021733	4	0.0086932	0.296098
chr15	34791295	34792090	Artery_Tibial	ACTC1	ENSG00000159251.6		chr15	34791308	34791353	AC	0.00383224	2	0.00766448	0.296098
chr5	138744762	138753523	Testis	AC034243.1	ENSG00000253404.1		chr5	138756028	138756055	ATTT	0.00422353	2	0.00844706	0.296098
chr21	36277100	36277975	Skin_Not_Sun_Exposed_Suprapubic	DOPEY2	ENSG00000142197.12		chr21	36286640	36286673	AC	0.00809163	1	0.00809163	0.296098
chr21	46230527	46240834	Uterus	MCM3AP-AS1	ENSG00000215424.9		chr21	46228816	46228851	AGGGGCGGG	0.00828375	1	0.00828375	0.296098
chr2	162197740	162198757	Cells_Cultured_fibroblasts	FAP	ENSG00000078098.13		chr2	162194273	162194300	GT	0.00828406	1	0.00828406	0.296098
chr19	37170054	37172627	Thyroid	ZNF585B	ENSG00000245680.9		chr19	37163739	37163760	GT	0.00832789	1	0.00832789	0.296098
chr21	29305322	29321221	Skin_Not_Sun_Exposed_Suprapubic	BACH1	ENSG00000156273.15		chr21	29307408	29307427	GT	0.00872966	1	0.00872966	0.296098
chr14	36525208	36560432	Thyroid	NKX2-1-AS1	ENSG00000253563.2		chr14	36519724	36519739	AG	0.00903191	1	0.00903191	0.296098
chr14	36525208	36560432	Thyroid	RP11-964E11.3	ENSG00000283098.1		chr14	36519724	36519739	AG	0.00903191	1	0.00903191	0.296098
chr15	68284977	68289607	Muscle_Skeletal	FEM1B	ENSG00000169018.5		chr15	68286475	68286498	AC	0.00909105	1	0.00909105	0.296098
chr2	241703883	241704653	Artery_Tibial	ING5	ENSG00000168395.15		chr2	241698497	241698538	GT	0.00913646	1	0.00913646	0.296098
chr20	57659697	57709474	Cells_Cultured_fibroblasts	PMEPA1	ENSG00000124225.15		chr20	57669143	57669178	AAAT	0.00944097	1	0.00944097	0.301718
chr16	89554563	89556887	Thyroid	SPG7	ENSG00000197912.14		chr16	89565284	89565308	CTGGG	0.000302544	32	0.0096814	0.305163
chr14	102251995	102283478	Testis	MOK	ENSG00000080823.22		chr14	102279285	102279311	AAC	0.0003528	28	0.00987839	0.307164
chr9	33402148	33410240	Adipose_Visceral_Omentum	RP11-311H10.4	ENSG00000223678.1		chr9	33407486	33407509	AC	0.00117741	9	0.0105967	0.312602
chr10	61760181	61765939	Brain_Amygdala	C10orf107	ENSG00000183346.6		chr10	61772521	61772544	AG	0.0025647	4	0.0102588	0.312602
chr17	44316026	44316385	Whole_Blood	RUNDC3A	ENSG00000108309.13		chr17	44306896	44306922	GTT	0.00528336	2	0.0105667	0.312602
chr1	44221640	44225766	Testis	ERI3-IT1	ENSG00000233602.1		chr1	44226779	44226814	GT	0.0104408	1	0.0104408	0.312602
chr15	50355765	50356100	Lung	GABPB1-AS1	ENSG00000244879.6		chr15	50351661	50351688	NA	0.00541114	2	0.0108223	0.315216
chr16	28863945	28866012	Nerve_Tibial	SH2B1	ENSG00000178188.14		chr16	28863894	28863917	CCG	0.000361891	38	0.0137519	0.317218
chr19	43608107	43614229	Brain_Hypothalamus	ZNF428	ENSG00000131116.11		chr19	43609360	43609377	CT	0.000443305	25	0.0110826	0.317218
chr7	80674147	80676108	Adipose_Subcutaneous	CD36	ENSG00000135218.17		chr7	80678082	80678113	GT	0.000574158	23	0.0132056	0.317218
chr22	30664080	30664955	Colon_Transverse	DUSP18	ENSG00000167065.13		chr22	30657277	30657306	AC	0.000697028	19	0.0132435	0.317218
chr4	15722934	15737787	Breast_Mammary_Tissue	BST1	ENSG00000109743.10		chr4	15739555	15739594	GT	0.000962678	14	0.0134775	0.317218
chr20	13785290	13787312	Artery_Tibial	NDUFAF5	ENSG00000101247.17		chr20	13785299	13785322	CGGCGGGG	0.00228527	5	0.0114264	0.317218
chr3	49999513	50046716	Skin_Not_Sun_Exposed_Suprapubic	RBM6	ENSG00000004534.14		chr3	49994670	49994695	GT	0.00273119	5	0.0136559	0.317218
chr10	93906385	93907099	Testis	SLC35G1	ENSG00000176273.14		chr10	93907796	93907830	AAAAT	0.00284929	5	0.0142465	0.317218
chr11	6394041	6394178	Artery_Coronary	SMPD1	ENSG00000166311.9		chr11	6390707	6390736	CGCTGG	0.00287704	5	0.0143852	0.317218
chr4	22346823	22389088	Colon_Transverse	ADGRA3	ENSG00000152990.13		chr4	22340462	22340493	GT	0.00297123	4	0.0118849	0.317218
chr2	171082852	171091614	Cells_EBV-transformed_lymphocytes	TLK1	ENSG00000198586.13		chr2	171091716	171091760	AAC	0.00361885	4	0.0144754	0.317218
chr8	122781946	122863477	Artery_Aorta	ZHX2	ENSG00000178764.7		chr8	122787089	122787114	GT	0.00392779	3	0.0117834	0.317218
chr5	149252837	149259546	Cells_Cultured_fibroblasts	ABLIM3	ENSG00000173210.19		chr5	149248860	149248899	AC	0.00451564	3	0.0135469	0.317218
chr12	120522363	120528940	Heart_Atrial_Appendage	COQ5	ENSG00000110871.14		chr12	120528204	120528231	ATTT	0.00453989	3	0.0136197	0.317218
chr5	146878195	146878591	Brain_Caudate_basal_ganglia	PPP2R2B	ENSG00000156475.18		chr5	146878728	146878757	AGC	0.0069804	2	0.0139608	0.317218
chr22	21055176	21056936	Pituitary	LRRC74B	ENSG00000187905.10		chr22	21056597	21056640	AC	0.00701092	2	0.0140218	0.317218
chr20	19281087	19515488	Testis	SLC24A3	ENSG00000185052.11		chr20	19337454	19337473	AAAT	0.0111985	1	0.0111985	0.317218
chr5	96662497	96675539	Cells_Cultured_fibroblasts	CTD-2337A12.1	ENSG00000251314.2		chr5	96666258	96666279	AC	0.0117631	1	0.0117631	0.317218
chr6	143788910	143807057	Lung	PHACTR2	ENSG00000112419.14		chr6	143796380	143796415	CTTT	0.0132361	1	0.0132361	0.317218
chr12	109744228	109768012	Testis	FAM222A	ENSG00000139438.5		chr12	109777592	109777613	GT	0.0132496	1	0.0132496	0.317218
chr2	46581591	46592475	Artery_Tibial	PIGF	ENSG00000151665.12		chr2	46575400	46575443	AC	0.0133958	1	0.0133958	0.317218
chr3	131382315	131383162	Artery_Tibial	NUDT16	ENSG00000198585.11		chr3	131390046	131390063	AT	0.013869	1	0.013869	0.317218
chr1	170227058	170237748	Testis	LINC01681	ENSG00000233985.1		chr1	170228519	170228550	GT	0.013983	1	0.013983	0.317218
chr17	17203098	17204010	Testis	FLCN	ENSG00000154803.12		chr17	17193554	17193579	GT	0.0139905	1	0.0139905	0.317218
chr17	17203098	17204010	Testis	PLD6	ENSG00000179598.5		chr17	17193554	17193579	GT	0.0139905	1	0.0139905	0.317218
chr16	67807196	67814302	Testis	TSNAXIP1	ENSG00000102904.14		chr16	67822567	67822590	AG	0.0143927	1	0.0143927	0.317218
chr7	128748804	128754262	Artery_Tibial	CALU	ENSG00000128595.16		chr7	128757359	128757392	GT	0.00376218	4	0.0150487	0.319017
chr17	76287897	76291015	Esophagus_Mucosa	QRICH2	ENSG00000129646.14		chr17	76285126	76285146	AAC	0.00496845	3	0.0149054	0.319017
chr9	128203631	128218231	Adipose_Visceral_Omentum	DNM1	ENSG00000106976.20		chr9	128200837	128200852	AAAT	0.00787635	2	0.0157527	0.319017
chr1	233614526	233621777	Brain_Cerebellum	KCNK1	ENSG00000135750.14		chr1	233606906	233606929	AAT	0.00797197	2	0.0159439	0.319017
chr19	20249184	20257251	Thyroid	AC078899.4	ENSG00000268620.1		chr19	20256593	20256620	AC	0.0153782	1	0.0153782	0.319017
chr19	7681049	7682242	Nerve_Tibial	TRAPPC5	ENSG00000181029.8		chr19	7686514	7686534	ATT	0.0154136	1	0.0154136	0.319017
chr10	113617553	113621869	Muscle_Skeletal	NRAP	ENSG00000197893.13		chr10	113621315	113621340	GT	0.0155987	1	0.0155987	0.319017
chr14	75103997	75105950	Muscle_Skeletal	NEK9	ENSG00000119638.12		chr14	75115115	75115126	GT	0.0156936	1	0.0156936	0.319017
chr3	177935484	177937539	Cells_Cultured_fibroblasts	RP11-2L8.1	ENSG00000225790.1		chr3	177939846	177939893	GT	0.0157343	1	0.0157343	0.319017
chr7	123550586	123551368	Cells_Cultured_fibroblasts	NDUFA5	ENSG00000128609.14		chr7	123540891	123540934	GT	0.0158171	1	0.0158171	0.319017
chr21	37192213	37195675	Esophagus_Mucosa	TTC3	ENSG00000182670.13		chr21	37192492	37192523	GT	0.000525735	31	0.0162978	0.320377
chr2	15613284	15617244	Skin_Not_Sun_Exposed_Suprapubic	DDX1	ENSG00000079785.14		chr2	15616063	15616086	GT	0.0162827	1	0.0162827	0.320377
chr14	31113484	31114286	Muscle_Skeletal	HECTD1	ENSG00000092148.12		chr14	31122264	31122285	AC	0.0164296	1	0.0164296	0.320377
chr17	9250645	9378552	Heart_Left_Ventricle	STX8	ENSG00000170310.14		chr17	9260628	9260655	GTTT	0.0055422	3	0.0166266	0.321494
chr22	43833734	43833989	Brain_Cerebellum	SULT4A1	ENSG00000130540.13		chr22	43827756	43827781	GT	0.00843595	2	0.0168719	0.323519
chr2	205697721	205716193	Thyroid	NRP2	ENSG00000118257.16		chr2	205690580	205690629	NA	0.00885892	2	0.0177178	0.336932
chr15	99126792	99129367	Muscle_Skeletal	SYNM	ENSG00000182253.14		chr15	99128002	99128033	ATTC	0.0178655	1	0.0178655	0.336955
chr2	46512812	46535813	Skin_Not_Sun_Exposed_Suprapubic	ATP6V1E2	ENSG00000250565.6		chr2	46518759	46518810	AC	0.00903159	2	0.0180632	0.337914
chr10	129536377	129707895	Skin_Sun_Exposed_Lower_leg	MGMT	ENSG00000170430.9		chr10	129560955	129560998	GT	0.000650899	30	0.019527	0.35686
chr18	6951185	6955353	Testis	LAMA1	ENSG00000101680.14		chr18	6956506	6956529	AGCTCC	0.00983766	2	0.0196753	0.35686
chr2	149743759	149847909	Nerve_Tibial	AC144449.1	ENSG00000231969.1		chr2	149743940	149743965	GT	0.0193389	1	0.0193389	0.35686
chr17	6818663	6819193	Testis	TEKT1	ENSG00000167858.12		chr17	6811307	6811334	AC	0.0197416	1	0.0197416	0.35686
chr20	10986757	10991598	Testis	RP11-103J8.1	ENSG00000270792.5		chr20	10987939	10987964	GT	0.0198514	1	0.0198514	0.35686
chr9	131106265	131111597	Adipose_Visceral_Omentum	AIF1L	ENSG00000126878.12		chr9	131109197	131109224	AATG	0.00182942	11	0.0201236	0.357868
chr6	33772778	33776954	Testis	LEMD2	ENSG00000161904.11		chr6	33774971	33774994	ATTC	0.0202185	1	0.0202185	0.357868
chr6	52479787	52481546	Testis	EFHC1	ENSG00000096093.15		chr6	52481505	52481540	CT	0.000525717	39	0.020503	0.360132
chr1	44221640	44225766	Testis	ERI3	ENSG00000117419.14		chr1	44226779	44226814	GT	0.0104408	2	0.0208815	0.361266
chr10	43111465	43112099	Adipose_Visceral_Omentum	RET	ENSG00000165731.18		chr10	43107560	43107601	AC	0.0208023	1	0.0208023	0.361266
chr8	38901892	38917907	Cells_Cultured_fibroblasts	PLEKHA2	ENSG00000169499.14		chr8	38899686	38899733	GT	0.0210715	1	0.0210715	0.361832
chr6	109619236	109641518	Brain_Cerebellar_Hemisphere	AK9	ENSG00000155085.15		chr6	109623863	109623904	GT	0.0107992	2	0.0215984	0.365426
chr17	51268904	51275866	Testis	UTP18	ENSG00000011260.13		chr17	51269840	51269869	GT	0.0215937	1	0.0215937	0.365426
chr19	55388048	55402943	Brain_Cerebellum	RPL28	ENSG00000108107.14		chr19	55397770	55397804	AGGTGGG	0.0111576	2	0.0223153	0.365492
chr19	50657192	50657989	Testis	C19orf81	ENSG00000235034.6		chr19	50653683	50653740	AC	0.022117	1	0.022117	0.365492
chr1	31651988	31656897	Testis	RP11-73M7.6	ENSG00000235790.7		chr1	31653747	31653774	AC	0.0222607	1	0.0222607	0.365492
chr1	31651988	31656897	Testis	RP11-73M7.9	ENSG00000264078.1		chr1	31653747	31653774	AC	0.0222607	1	0.0222607	0.365492
chr5	7757586	7766687	Esophagus_Muscularis	ADCY2	ENSG00000078295.16		chr5	7763052	7763079	GTTT	0.0223965	1	0.0223965	0.365492
chr22	50586639	50586843	Brain_Putamen_basal_ganglia	CHKB-AS1	ENSG00000205559.3		chr22	50589635	50589654	GTTTT	0.00202761	12	0.0243314	0.367379
chr1	46812623	46813482	Esophagus_Muscularis	CYP4B1	ENSG00000142973.13		chr1	46816582	46816605	AC	0.00216548	11	0.0238203	0.367379
chr10	87721770	87727284	Adipose_Visceral_Omentum	PAPSS2	ENSG00000198682.12		chr10	87725885	87725914	AC	0.00568421	4	0.0227368	0.367379
chr16	20911264	20915556	Cells_Cultured_fibroblasts	LYRM1	ENSG00000102897.9		chr16	20904692	20904725	GT	0.00798023	3	0.0239407	0.367379
chr12	101901433	101920109	Lung	DRAM1	ENSG00000136048.13		chr12	101901079	101901124	GT	0.0114956	2	0.0229913	0.367379
chr17	81684103	81685605	Skin_Not_Sun_Exposed_Suprapubic	HGS	ENSG00000185359.12		chr17	81676449	81676462	CT	0.011589	2	0.0231781	0.367379
chr19	13208053	13208756	Brain_Cerebellar_Hemisphere	CACNA1A	ENSG00000141837.19		chr19	13207859	13207897	AGC	0.012214	2	0.0244281	0.367379
chr10	17359600	17390531	Nerve_Tibial	ST8SIA6	ENSG00000148488.15		chr10	17363291	17363308	AC	0.0232762	1	0.0232762	0.367379
chr11	119678765	119680483	Esophagus_Mucosa	NECTIN1	ENSG00000110400.10		chr11	119683574	119683609	AC	0.0235462	1	0.0235462	0.367379
chr12	9112211	9113360	Nerve_Tibial	A2M	ENSG00000175899.14		chr12	9108100	9108139	AAAAT	0.0239552	1	0.0239552	0.367379
chr7	90355230	90372155	Cells_Cultured_fibroblasts	GTPBP10	ENSG00000105793.15		chr7	90370336	90370359	GT	0.024017	1	0.024017	0.367379
chr20	37502554	37509104	Heart_Atrial_Appendage	BLCAP	ENSG00000166619.12		chr20	37507862	37507903	AC	0.0241225	1	0.0241225	0.367379
chr1	206480533	206484997	Cells_Cultured_fibroblasts	IKBKE	ENSG00000263528.7		chr1	206484096	206484160	ATTGT	0.0031314	8	0.0250512	0.367467
chr12	125076611	125086330	Thyroid	AACS	ENSG00000081760.16		chr12	125080471	125080488	CT	0.0125363	2	0.0250727	0.367467
chr5	122425531	122431969	Artery_Tibial	SNCAIP	ENSG00000064692.18		chr5	122433113	122433148	GT	0.0247272	1	0.0247272	0.367467
chr12	82374310	82386803	Thyroid	METTL25	ENSG00000127720.7		chr12	82391541	82391556	GT	0.0249786	1	0.0249786	0.367467
chr17	76479941	76481375	Nerve_Tibial	RHBDF2	ENSG00000129667.12		chr17	76481953	76482002	GT	0.000991103	26	0.0257687	0.375277
chr18	66535107	66543971	Esophagus_Muscularis	CDH19	ENSG00000071991.8		chr18	66533214	66533239	GT	0.00251528	11	0.0276681	0.3806
chr1	15729929	15731192	Artery_Tibial	PLEKHM2	ENSG00000116786.11		chr1	15730047	15730076	CGGGG	0.00274865	10	0.0274864	0.3806
chr6	70568025	70579414	Cells_Cultured_fibroblasts	SDHAF4	ENSG00000154079.5		chr6	70587169	70587198	AC	0.00908939	3	0.0272682	0.3806
chr19	2324196	2328387	Brain_Nucleus_accumbens_basal_ganglia	LSM7	ENSG00000130332.14		chr19	2326313	2326356	AC	0.0265967	1	0.0265967	0.3806
chr12	29572218	29604178	Muscle_Skeletal	TMTC1	ENSG00000133687.15		chr12	29591909	29591933	GTTTT	0.0270119	1	0.0270119	0.3806
chr19	10500080	10502697	Skin_Not_Sun_Exposed_Suprapubic	KEAP1	ENSG00000079999.13		chr19	10506167	10506198	AAAT	0.0272398	1	0.0272398	0.3806
chr12	566178	663328	Skin_Not_Sun_Exposed_Suprapubic	RP5-1154L15.2	ENSG00000256020.1		chr12	620618	620645	AAAC	0.0272468	1	0.0272468	0.3806
chr19	10797518	10798486	Esophagus_Muscularis	DNM2	ENSG00000079805.16		chr19	10794345	10794378	GT	0.0276112	1	0.0276112	0.3806
chr8	40581261	40674704	Testis	ZMAT4	ENSG00000165061.14		chr8	40655060	40655081	GT	0.0276624	1	0.0276624	0.3806
chr11	110093432	110136663	Cells_Cultured_fibroblasts	ZC3H12C	ENSG00000149289.10		chr11	110125271	110125320	GT	0.0277882	1	0.0277882	0.3806
chr7	134745572	134843884	Skin_Sun_Exposed_Lower_leg	CALD1	ENSG00000122786.19		chr7	134750112	134750139	AAAC	0.00371013	8	0.029681	0.385854
chr6	41789336	41789568	Testis	TOMM6	ENSG00000214736.7		chr6	41799080	41799115	AAAT	0.014349	2	0.0286979	0.385854
chr1	47197940	47219506	Whole_Blood	PDZK1IP1	ENSG00000162366.7		chr1	47206695	47206738	AC	0.028609	1	0.028609	0.385854
chr6	105147380	105168739	Testis	BVES-AS1	ENSG00000203808.10		chr6	105138335	105138361	ATG	0.028801	1	0.028801	0.385854
chr1	172253682	172308728	Pituitary	DNM3	ENSG00000197959.13		chr1	172253490	172253544	CCTCT	0.028944	1	0.028944	0.385854
chr12	107739664	107745784	Testis	RP11-864J10.4	ENSG00000258136.1		chr12	107738879	107738914	AC	0.0290276	1	0.0290276	0.385854
chr9	36246482	36258321	Adipose_Subcutaneous	GNE	ENSG00000159921.14		chr9	36254206	36254229	AAAT	0.0292323	1	0.0292323	0.385854
chr4	17612829	17613932	Testis	AC006160.5	ENSG00000249502.1		chr4	17605119	17605148	AC	0.0293732	1	0.0293732	0.385854
chr4	174966465	174975346	Testis	ADAM29	ENSG00000168594.15		chr4	174968772	174968807	AC	0.0296322	1	0.0296322	0.385854
chr1	37998132	37998974	Colon_Sigmoid	FHL3	ENSG00000183386.9		chr1	37996716	37996757	GT	0.0100882	3	0.0302647	0.389045
chr11	18282220	18285346	Testis	HPS5	ENSG00000110756.17		chr11	18288735	18288758	AC	0.0150975	2	0.0301951	0.389045
chr3	128909421	128910021	Brain_Cortex	ACAD9	ENSG00000177646.18		chr3	128901173	128901200	ATGG	0.00140388	22	0.0308853	0.394817
chr1	161212654	161213380	Cells_Cultured_fibroblasts	NDUFS2	ENSG00000158864.12		chr1	161214270	161214299	GT	0.00183519	17	0.0311982	0.396403
chr9	135547981	135548643	Testis	OBP2A	ENSG00000122136.13		chr9	135556523	135556556	GT	0.0313539	1	0.0313539	0.396403
chr5	83258677	83353125	Skin_Sun_Exposed_Lower_leg	XRCC4	ENSG00000152422.15		chr5	83344131	83344160	AC	0.00635642	5	0.0317821	0.399621
chr15	67166691	67166779	Esophagus_Mucosa	SMAD3	ENSG00000166949.15		chr15	67162947	67162988	ATG	0.0322412	1	0.0322412	0.403191
chr12	108818313	108823258	Brain_Substantia_nigra	SSH1	ENSG00000084112.14		chr12	108821217	108821242	GT	0.0327035	1	0.0327035	0.406761
chr16	31115869	31117463	Brain_Cortex	KAT8	ENSG00000103510.19		chr16	31121086	31121115	GT	0.0164477	2	0.0328954	0.406948
chr12	121405113	121416159	Testis	RNF34	ENSG00000170633.16		chr12	121406284	121406304	GTT	0.016666	2	0.0333319	0.409248
chr7	96969118	96978347	Brain_Putamen_basal_ganglia	DLX6-AS1	ENSG00000231764.8		chr7	96975813	96975839	ATT	0.033437	1	0.033437	0.409248
chr2	159429260	159432757	Muscle_Skeletal	BAZ2B	ENSG00000123636.17		chr2	159434152	159434175	AAT	0.0339582	1	0.0339582	0.413428
chr4	146111473	146111601	Testis	LINC01095	ENSG00000248809.5		chr4	146110359	146110396	GT	0.0351507	1	0.0351507	0.422434
chr4	146111473	146111601	Testis	RP11-203B7.1	ENSG00000251024.1		chr4	146110359	146110396	GT	0.0351507	1	0.0351507	0.422434
chr2	241897334	241899115	Testis	AC131097.4	ENSG00000216921.7		chr2	241887493	241887514	CT	0.0352488	1	0.0352488	0.422434
chr12	54054361	54054850	Artery_Tibial	HOXC4	ENSG00000198353.7		chr12	54057248	54057271	GT	0.0356708	1	0.0356708	0.425277
chr11	61487240	61489782	Lung	PPP1R32	ENSG00000162148.10		chr11	61493995	61494022	AATG	0.00303744	12	0.0364493	0.429575
chr19	45164970	45178093	Adipose_Visceral_Omentum	TRAPPC6A	ENSG00000007255.10		chr19	45177192	45177219	GT	0.018389	2	0.036778	0.429575
chr3	196324440	196327390	Testis	TM4SF19	ENSG00000145107.15		chr3	196326390	196326415	AC	0.0367705	1	0.0367705	0.429575
chr17	63766194	63773412	Cells_Cultured_fibroblasts	CCDC47	ENSG00000108588.13		chr17	63765121	63765154	GT	0.0367711	1	0.0367711	0.429575
chr11	57704635	57704719	Nerve_Tibial	MED19	ENSG00000156603.15		chr11	57698119	57698148	AC	0.0373875	1	0.0373875	0.434488
chr10	30434378	30434637	Cells_EBV-transformed_lymphocytes	MAP3K8	ENSG00000107968.9		chr10	30431217	30431260	ACAT	0.0127148	3	0.0381445	0.435425
chr22	29832342	29834442	Cells_Cultured_fibroblasts	ASCC2	ENSG00000100325.14		chr22	29838204	29838227	CGG	0.0127767	3	0.0383302	0.435425
chr6	25600746	25604812	Lung	CARMIL1	ENSG00000079691.17		chr6	25607194	25607209	AC	0.0381261	1	0.0381261	0.435425
chr5	6633869	6651842	Skin_Sun_Exposed_Lower_leg	SRD5A1	ENSG00000145545.11		chr5	6654435	6654450	GTTT	0.0382893	1	0.0382893	0.435425
chr17	38543969	38548557	Testis	SRCIN1	ENSG00000277363.4		chr17	38540741	38540772	AC	0.0384143	1	0.0384143	0.435425
chr17	57866544	57871286	Heart_Left_Ventricle	CUEDC1	ENSG00000180891.12		chr17	57878648	57878683	AAAT	0.019476	2	0.038952	0.439355
chr14	57481657	57483065	Cells_EBV-transformed_lymphocytes	C14orf105	ENSG00000100557.9		chr14	57477487	57477504	GT	0.0132478	3	0.0397433	0.443929
chr12	9283774	9288202	Cells_EBV-transformed_lymphocytes	RP11-22B23.1	ENSG00000111788.10		chr12	9283456	9283487	AC	0.0395858	1	0.0395858	0.443929
chr14	85530534	85621139	Thyroid	FLRT2	ENSG00000185070.10		chr14	85586694	85586713	AC	0.01011	4	0.04044	0.444509
chr9	127734564	127735120	Skin_Sun_Exposed_Lower_leg	TOR2A	ENSG00000160404.17		chr9	127736259	127736288	GT	0.0201349	2	0.0402699	0.444509
chr19	49479047	49480552	Thyroid	FLT3LG	ENSG00000090554.12		chr19	49478160	49478183	AAAT	0.0203419	2	0.0406838	0.444509
chr19	44644175	44647223	Adipose_Visceral_Omentum	PVR	ENSG00000073008.14		chr19	44648653	44648677	GTTTT	0.0203456	2	0.0406912	0.444509
chr1	198692373	198703298	Artery_Aorta	PTPRC	ENSG00000081237.18		chr1	198686995	198687018	GTT	0.0203806	2	0.0407612	0.444509
chr5	139679940	139680364	Brain_Spinal_cord_cervical_c-1	CXXC5	ENSG00000171604.11		chr5	139682325	139682354	AGCCCC	0.00132103	32	0.0422729	0.451352
chr16	81121713	81123651	Skin_Not_Sun_Exposed_Suprapubic	PKD1L2	ENSG00000166473.17		chr16	81125753	81125780	ATTT	0.00358779	12	0.0430535	0.451352
chr11	428199	428358	Prostate	ANO9	ENSG00000185101.12		chr11	423886	423923	GT	0.00383525	11	0.0421877	0.451352
chr6	46900083	46906661	Artery_Tibial	ADGRF5	ENSG00000069122.18		chr6	46910008	46910037	ATTTT	0.00616487	7	0.0431541	0.451352
chr15	40539355	40553437	Brain_Cerebellum	C15orf57	ENSG00000128891.15		chr15	40539841	40539880	AC	0.0107041	4	0.0428164	0.451352
chr6	160956700	160958969	Esophagus_Mucosa	RP3-428L16.1	ENSG00000231863.1		chr6	160952004	160952039	AC	0.0209553	2	0.0419106	0.451352
chr6	166931118	166938895	Colon_Transverse	RPS6KA2	ENSG00000071242.11		chr6	166936351	166936374	AC	0.0214801	2	0.0429601	0.451352
chr18	71782275	71786985	Testis	LINC01899	ENSG00000265352.1		chr18	71776660	71776675	AAAC	0.0420974	1	0.0420974	0.451352
chr14	101762970	101765154	Brain_Hypothalamus	PPP2R5C	ENSG00000078304.19		chr14	101771223	101771264	GT	0.0430501	1	0.0430501	0.451352
chr15	40776292	40776542	Artery_Tibial	DNAJC17	ENSG00000104129.9		chr15	40780813	40780837	ATTTT	0.0434331	1	0.0434331	0.452215
chr8	2140886	2143401	Thyroid	MYOM2	ENSG00000036448.9		chr8	2137565	2137582	GT	0.0110547	4	0.044219	0.456268
chr2	241071878	241081677	Thyroid	SNED1	ENSG00000162804.13		chr2	241085698	241085713	GTTT	0.0441724	1	0.0441724	0.456268
chr14	96039527	96086511	Cells_Cultured_fibroblasts	C14orf132	ENSG00000227051.6		chr14	96038580	96038607	AC	0.0445246	1	0.0445246	0.457371
chr19	49514133	49514211	Artery_Tibial	FCGRT	ENSG00000104870.12		chr19	49516552	49516569	GTT	0.00345847	13	0.0449601	0.459792
chr15	57376567	57437985	Pituitary	CGNL1	ENSG00000128849.10		chr15	57409038	57409073	NA	0.00268634	17	0.0456678	0.462664
chr10	11863042	11866531	Thyroid	PROSER2	ENSG00000148426.12		chr10	11868641	11868660	GTTTT	0.00771912	6	0.0463147	0.462664
chr12	31802163	31804675	Spleen	RP11-428G5.5	ENSG00000255760.1		chr12	31803343	31803376	GT	0.0153393	3	0.0460179	0.462664
chr22	17088149	17097062	Whole_Blood	IL17RA	ENSG00000177663.13		chr22	17082257	17082280	AGAT	0.0456869	1	0.0456869	0.462664
chr6	26422197	26422933	Adipose_Subcutaneous	BTN2A3P	ENSG00000124549.14		chr6	26422160	26422174	CCT	0.0460981	1	0.0460981	0.462664
chr22	30492557	30494866	Testis	SEC14L4	ENSG00000133488.14		chr22	30489230	30489253	AAAC	0.0466865	1	0.0466865	0.462664
chr5	140281533	140303041	Esophagus_Muscularis	PFDN1	ENSG00000113068.9		chr5	140276016	140276060	ATG	0.0468094	1	0.0468094	0.462664
chr14	104771816	104772365	Thyroid	AKT1	ENSG00000142208.15		chr14	104762932	104762951	AAAT	0.0468495	1	0.0468495	0.462664
chr9	70170631	70218337	Artery_Aorta	MAMDC2	ENSG00000165072.9		chr9	70179353	70179370	AC	0.011785	4	0.0471398	0.463541
chr4	2337496	2339453	Lung	ZFYVE28	ENSG00000159733.13		chr4	2337878	2337889	GT	0.00403684	12	0.0484421	0.468772
chr16	31522943	31528136	Testis	AHSP	ENSG00000169877.9		chr16	31518243	31518266	GT	0.024272	2	0.048544	0.468772
chr3	126115416	126118005	Liver	ALDH1L1	ENSG00000144908.13		chr3	126124111	126124148	GT	0.0245166	2	0.0490333	0.468772
chr2	105049350	105071313	Uterus	MRPS9	ENSG00000135972.8		chr2	105078316	105078341	GT	0.048449	1	0.048449	0.468772
chr20	38037534	38040435	Testis	RPRD1B	ENSG00000101413.11		chr20	38030529	38030562	GT	0.0487158	1	0.0487158	0.468772
chr14	69075411	69091674	Testis	DCAF5	ENSG00000139990.17		chr14	69077366	69077401	AAAT	0.0491977	1	0.0491977	0.468772
chr10	73254055	73256369	Muscle_Skeletal	CFAP70	ENSG00000156042.17		chr10	73255628	73255643	AAAC	0.049283	1	0.049283	0.468772
chr20	37147909	37157860	Colon_Transverse	MROH8	ENSG00000101353.14		chr20	37142736	37142770	GTTTT	0.0493015	1	0.0493015	0.468772
chr18	7774271	7888106	Thyroid	PTPRM	ENSG00000173482.16		chr18	7833744	7833782	AAC	0.0247992	2	0.0495984	0.469654
chr16	954666	970788	Lung	LMF1	ENSG00000103227.18		chr16	954959	954970	GT	0.0250791	2	0.0501583	0.470618
chr3	49674413	49675694	Muscle_Skeletal	APEH	ENSG00000164062.12		chr3	49673802	49673837	ACGCTC	0.0500955	1	0.0500955	0.470618
chr10	62259250	62265995	Esophagus_Mucosa	RP11-120C12.3	ENSG00000234756.1		chr10	62260535	62260554	AC	0.0503138	1	0.0503138	0.470618
chr11	61487240	61489782	Lung	RP11-286N22.10	ENSG00000255931.1		chr11	61493995	61494022	AATG	0.00303744	17	0.0516364	0.475262
chr16	20627316	20661794	Artery_Aorta	ACSM1	ENSG00000166743.9		chr16	20649176	20649200	ATTTT	0.0171246	3	0.0513739	0.475262
chr15	41505777	41507095	Lung	LTK	ENSG00000062524.15		chr15	41516830	41516873	ATCT	0.0512309	1	0.0512309	0.475262
chr12	6639037	6639165	Whole_Blood	ACRBP	ENSG00000111644.7		chr12	6635958	6635982	AGCCC	0.0515459	1	0.0515459	0.475262
chr22	21568377	21592861	Testis	UBE2L3	ENSG00000185651.14		chr22	21598196	21598209	GT	0.0518688	1	0.0518688	0.475498
chr7	501242	510809	Muscle_Skeletal	PDGFA	ENSG00000197461.13		chr7	502769	502810	NA	0.00873794	6	0.0524276	0.477018
chr15	88253478	88255986	Testis	NTRK3-AS1	ENSG00000260305.1		chr15	88243537	88243576	GT	0.0524492	1	0.0524492	0.477018
chr22	42876333	42879048	Muscle_Skeletal	PACSIN2	ENSG00000100266.18		chr22	42886419	42886454	ACCT	0.00881622	6	0.0528973	0.479069
chr18	34838837	34848296	Brain_Nucleus_accumbens_basal_ganglia	DTNA	ENSG00000134769.21		chr18	34833405	34833436	GT	0.0265455	2	0.0530911	0.479069
chr2	37147822	37148857	Cells_Cultured_fibroblasts	EIF2AK2	ENSG00000055332.16		chr2	37156911	37156937	CGG	0.0535509	1	0.0535509	0.48133
chr6	4996420	4999809	Adrenal_Gland	RPP40	ENSG00000124787.13		chr6	4989448	4989467	AC	0.00426043	13	0.0553856	0.486329
chr20	410025	417526	Adipose_Subcutaneous	RBCK1	ENSG00000125826.20		chr20	417396	417423	GT	0.00930773	6	0.0558464	0.486329
chr4	79606956	79623228	Adipose_Visceral_Omentum	RP11-452C8.1	ENSG00000248408.1		chr4	79632002	79632027	CT	0.0279366	2	0.0558731	0.486329
chr10	95653405	95656446	Cells_Cultured_fibroblasts	ALDH18A1	ENSG00000059573.8		chr10	95648321	95648362	ATG	0.0556622	1	0.0556622	0.486329
chr2	233761151	233767034	Liver	UGT1A2P	ENSG00000228445.1		chr2	233760234	233760247	AT	0.0560092	1	0.0560092	0.486329
chr2	233761151	233767034	Liver	UGT1A9	ENSG00000241119.1		chr2	233760234	233760247	AT	0.0560092	1	0.0560092	0.486329
chr2	233761151	233767034	Liver	UGT1A1	ENSG00000241635.7		chr2	233760234	233760247	AT	0.0560092	1	0.0560092	0.486329
chr2	233761151	233767034	Liver	UGT1A3	ENSG00000243135.6		chr2	233760234	233760247	AT	0.0560092	1	0.0560092	0.486329
chr2	233761151	233767034	Liver	UGT1A4	ENSG00000244474.5		chr2	233760234	233760247	AT	0.0560092	1	0.0560092	0.486329
chr1	201143951	201145109	Testis	TMEM9	ENSG00000116857.16		chr1	201152162	201152187	AC	0.0188372	3	0.0565117	0.487017
chr22	39376197	39381696	Testis	SYNGR1	ENSG00000100321.14		chr22	39378374	39378397	ATTC	0.056402	1	0.056402	0.487017
chr7	157381986	157382246	Esophagus_Muscularis	DNAJB6	ENSG00000105993.14		chr7	157381746	157381775	GT	0.00567989	10	0.0567989	0.487665
chr11	10002689	10028452	Adipose_Subcutaneous	SBF2	ENSG00000133812.15		chr11	10033664	10033689	GT	0.0575551	1	0.0575551	0.492321
chr9	114092174	114092333	Thyroid	KIF12	ENSG00000136883.13		chr9	114091468	114091487	GTTTT	0.0291553	2	0.0583106	0.495103
chr11	134177457	134178634	Testis	NCAPD3	ENSG00000151503.12		chr11	134177883	134177906	AAAG	0.0581864	1	0.0581864	0.495103
chr7	27895416	27913392	Testis	JAZF1	ENSG00000153814.11		chr7	27909003	27909026	AATG	0.0293177	2	0.0586354	0.496029
chr20	23356825	23357051	Testis	LINC01431	ENSG00000232645.5		chr20	23355009	23355056	AC	0.0593649	1	0.0593649	0.500362
chr8	23103181	23114657	Whole_Blood	TNFRSF10C	ENSG00000173535.13		chr8	23093586	23093639	AC	0.029798	2	0.0595959	0.500475
chr17	50552180	50554251	Skin_Sun_Exposed_Lower_leg	SPATA20	ENSG00000006282.20		chr17	50554886	50554929	GT	0.00182129	35	0.063745	0.503099
chr17	64350433	64352390	Artery_Coronary	PECAM1	ENSG00000261371.5		chr17	64360815	64360844	AC	0.00249553	26	0.0648838	0.503099
chr20	17570211	17600738	Thyroid	DSTN	ENSG00000125868.15		chr20	17594083	17594118	AAAT	0.00283922	22	0.0624628	0.503099
chr19	43504238	43504589	Esophagus_Mucosa	PHLDB3	ENSG00000176531.10		chr19	43503281	43503316	AG	0.00300885	21	0.0631858	0.503099
chr1	175192716	175192860	Artery_Aorta	KIAA0040	ENSG00000235750.9		chr1	175194113	175194136	AAAT	0.00315039	20	0.0630078	0.503099
chr17	67963506	67964212	Muscle_Skeletal	BPTF	ENSG00000171634.16		chr17	67959646	67959663	AGCCCCTCC	0.0300672	2	0.0601344	0.503099
chr10	132406289	132417061	Skin_Sun_Exposed_Lower_leg	PWWP2B	ENSG00000171813.13		chr10	132409629	132409656	ACCC	0.0305929	2	0.0611859	0.503099
chr22	42560265	42571121	Nerve_Tibial	SERHL2	ENSG00000183569.17		chr22	42564968	42564987	GT	0.0312945	2	0.0625889	0.503099
chr1	16970767	16972360	Skin_Not_Sun_Exposed_Suprapubic	CROCC	ENSG00000058453.16		chr1	16971211	16971252	GT	0.0608088	1	0.0608088	0.503099
chr2	68386686	68388387	Lung	PLEK	ENSG00000115956.9		chr2	68384155	68384202	CCTTCT	0.0609955	1	0.0609955	0.503099
chr20	44197739	44202961	Brain_Nucleus_accumbens_basal_ganglia	FITM2	ENSG00000197296.5		chr20	44203695	44203730	GT	0.0619521	1	0.0619521	0.503099
chr17	43522226	43536412	Cells_Cultured_fibroblasts	DHX8	ENSG00000067596.10		chr17	43518574	43518591	ATT	0.0624933	1	0.0624933	0.503099
chr2	176176692	176177711	Testis	HAGLR	ENSG00000224189.6		chr2	176168567	176168586	AAAAC	0.0628049	1	0.0628049	0.503099
chr7	65976202	65980224	Muscle_Skeletal	GUSB	ENSG00000169919.16		chr7	65988752	65988791	AAAAC	0.0632641	1	0.0632641	0.503099
chr8	22228386	22231796	Brain_Cerebellum	PHYHIP	ENSG00000168490.13		chr8	22241506	22241535	GT	0.063425	1	0.063425	0.503099
chr2	227876494	227885351	Testis	DAW1	ENSG00000123977.9		chr2	227886789	227886812	AAAC	0.0635602	1	0.0635602	0.503099
chr6	32950803	32952949	Cells_Cultured_fibroblasts	HLA-DMB	ENSG00000242574.8		chr6	32961218	32961235	GT	0.0638279	1	0.0638279	0.503099
chr5	132826182	132830594	Adipose_Visceral_Omentum	SHROOM1	ENSG00000164403.14		chr5	132827614	132827648	GTTTT	0.0638536	1	0.0638536	0.503099
chr1	54731700	54737582	Lung	TTC4	ENSG00000243725.6		chr1	54744229	54744274	AC	0.0639272	1	0.0639272	0.503099
chr11	68122203	68129081	Testis	CTD-2655K5.1	ENSG00000255236.2		chr11	68126714	68126731	AAT	0.0641095	1	0.0641095	0.503099
chr3	193263235	193276965	Testis	HRASLS	ENSG00000127252.5		chr3	193270070	193270105	AC	0.0643403	1	0.0643403	0.503099
chr8	143739948	143741752	Testis	FAM83H-AS1	ENSG00000203499.11		chr8	143750945	143750966	GT	0.0648867	1	0.0648867	0.503099
chr10	116692467	116698635	Nerve_Tibial	HSPA12A	ENSG00000165868.13		chr10	116707154	116707191	GT	0.0649371	1	0.0649371	0.503099
chr17	18169621	18171638	Nerve_Tibial	MYO15A	ENSG00000091536.16		chr17	18169453	18169476	AAT	0.0218493	3	0.065548	0.506127
chr7	51025231	51026546	Nerve_Tibial	COBL	ENSG00000106078.17		chr7	51024654	51024693	ATTC	0.0659016	1	0.0659016	0.507156
chr2	44390305	44704283	Muscle_Skeletal	CAMKMT	ENSG00000143919.14		chr2	44505843	44505882	ATTT	0.0669	1	0.0669	0.513123
chr17	58087222	58089142	Stomach	DYNLL2	ENSG00000264364.2		chr17	58081364	58081383	GT	0.0673028	1	0.0673028	0.514498
chr10	130079901	130110704	Stomach	LINC00959	ENSG00000237489.3		chr10	130099511	130099550	AAAT	0.00296472	23	0.0681885	0.519542
chr19	8316645	8320857	Artery_Tibial	NDUFA7	ENSG00000267855.5		chr19	8328388	8328433	GT	0.00263822	26	0.0685938	0.520906
chr3	40446847	40453122	Ovary	ENTPD3-AS1	ENSG00000223797.5		chr3	40451412	40451447	GT	0.00279795	25	0.0699488	0.525988
chr9	135937745	135938222	Muscle_Skeletal	UBAC1	ENSG00000130560.8		chr9	135927905	135927916	AC	0.0232659	3	0.0697977	0.525988
chr10	133381659	133388956	Thyroid	PAOX	ENSG00000148832.15		chr10	133390411	133390446	AC	0.0696385	1	0.0696385	0.525988
chr14	63539689	63542779	Artery_Aorta	PPP2R5E	ENSG00000154001.13		chr14	63546075	63546125	AAC	0.00503227	14	0.0704518	0.528044
chr21	41422911	41427206	Lung	MX1	ENSG00000157601.13		chr21	41420288	41420305	CGCGGG	0.00793158	9	0.0713842	0.529355
chr5	178135312	178138108	Esophagus_Muscularis	RMND5B	ENSG00000145916.18		chr5	178138520	178138547	GT	0.00905223	8	0.0724178	0.529355
chr3	33154033	33207808	Artery_Tibial	SUSD5	ENSG00000173705.8		chr3	33175548	33175563	GT	0.0357697	2	0.0715393	0.529355
chr19	45770640	45770971	Muscle_Skeletal	DMPK	ENSG00000104936.17		chr19	45770205	45770264	CTG	0.0361925	2	0.072385	0.529355
chr6	25777624	25777926	Pancreas	SLC17A4	ENSG00000146039.10		chr6	25777565	25777606	AAC	0.071751	1	0.071751	0.529355
chr1	54184265	54187652	Adipose_Subcutaneous	CYB5RL	ENSG00000215883.10		chr1	54183976	54184003	ATTT	0.0721224	1	0.0721224	0.529355
chr2	99155051	99161957	Stomach	LIPT1	ENSG00000144182.16		chr2	99165020	99165061	GT	0.0724671	1	0.0724671	0.529355
chr2	99155051	99161957	Stomach	MRPL30	ENSG00000185414.19		chr2	99165020	99165061	GT	0.0724671	1	0.0724671	0.529355
chr15	89901803	89903216	Thyroid	ARPIN	ENSG00000242498.7		chr15	89895880	89895907	AAAC	0.00918679	8	0.0734943	0.532362
chr12	32633689	32638655	Whole_Blood	FGD4	ENSG00000139132.14		chr12	32637600	32637623	AAAT	0.0367864	2	0.0735729	0.532362
chr2	186033802	186038331	Testis	LINC01473	ENSG00000237877.6		chr2	186024679	186024693	CTTTG	0.0733859	1	0.0733859	0.532362
chr20	22561095	22564116	Liver	LINC00261	ENSG00000259974.2		chr20	22571522	22571559	AC	0.0371755	2	0.074351	0.532503
chr1	8364838	8365812	Testis	RERE	ENSG00000142599.17		chr1	8372508	8372543	AC	0.0739089	1	0.0739089	0.532503
chr22	44731004	44731730	Whole_Blood	ARHGAP8	ENSG00000241484.9		chr22	44725660	44725683	GTT	0.0742148	1	0.0742148	0.532503
chr14	67392427	67392662	Testis	PLEK2	ENSG00000100558.8		chr14	67391272	67391305	AC	0.0745181	1	0.0745181	0.532503
chr12	6578917	6581038	Lung	CHD4	ENSG00000111642.14		chr12	6580230	6580256	AAC	0.00444472	17	0.0755602	0.535715
chr5	181045598	181047927	Heart_Left_Ventricle	BTNL9	ENSG00000165810.16		chr5	181057009	181057044	GT	0.0063443	12	0.0761316	0.535715
chr2	85847562	85847861	Stomach	ST3GAL5	ENSG00000115525.17		chr2	85849856	85849889	NA	0.015216	5	0.0760802	0.535715
chr11	33026049	33027686	Testis	DEPDC7	ENSG00000121690.10		chr11	33030453	33030476	AGAT	0.0253311	3	0.0759932	0.535715
chr20	3964024	4015437	Whole_Blood	RNF24	ENSG00000101236.16		chr20	4014740	4014777	GT	0.075436	1	0.075436	0.535715
chr11	33039792	33043750	Adipose_Visceral_Omentum	TCP11L1	ENSG00000176148.15		chr11	33030453	33030476	AGAT	0.0764702	1	0.0764702	0.536457
chr20	32029838	32030923	Thyroid	CCM2L	ENSG00000101331.15		chr20	32039241	32039258	AT	0.00647377	12	0.0776852	0.538784
chr15	51829836	51862811	Cells_Cultured_fibroblasts	TMOD3	ENSG00000138594.13		chr15	51837072	51837085	AT	0.0259128	3	0.0777385	0.538784
chr15	78034739	78044900	Artery_Tibial	TBC1D2B	ENSG00000167202.11		chr15	78039752	78039785	GT	0.0770738	1	0.0770738	0.538784
chr5	39269819	39270569	Whole_Blood	FYB	ENSG00000082074.15		chr5	39270927	39270948	AC	0.0776159	1	0.0776159	0.538784
chr14	29656499	29663699	Esophagus_Gastroesophageal_Junction	PRKD1	ENSG00000184304.14		chr14	29646534	29646569	ATCT	0.0111825	7	0.0782772	0.53977
chr5	157505808	157507056	Adipose_Subcutaneous	ADAM19	ENSG00000135074.15		chr5	157497571	157497598	GT	0.0261166	3	0.0783499	0.53977
chr7	2795143	2843853	Skin_Sun_Exposed_Lower_leg	GNA12	ENSG00000146535.13		chr7	2812637	2812696	ATGTG	0.026671	3	0.0800129	0.547945
chr22	26860364	26860684	Thyroid	LINC01422	ENSG00000223704.1		chr22	26863384	26863413	ATTTT	0.0799456	1	0.0799456	0.547945
chr9	75083150	75087651	Skin_Sun_Exposed_Lower_leg	NMRK1	ENSG00000106733.20		chr9	75090295	75090330	GT	0.00389392	21	0.0817723	0.552212
chr7	65230628	65231541	Brain_Nucleus_accumbens_basal_ganglia	INTS4P1	ENSG00000164669.12		chr7	65234604	65234633	AC	0.0270453	3	0.0811358	0.552212
chr12	566178	663328	Skin_Not_Sun_Exposed_Suprapubic	NINJ2	ENSG00000171840.11		chr12	620618	620645	AAAC	0.0272468	3	0.0817405	0.552212
chr16	68086698	68121987	Testis	NFATC3	ENSG00000072736.18		chr16	68120732	68120755	AAAC	0.0813856	1	0.0813856	0.552212
chr17	37519071	37520538	Vagina	SYNRG	ENSG00000275066.4		chr17	37522135	37522156	GT	0.0820458	1	0.0820458	0.552212
chr11	134393814	134411807	Brain_Spinal_cord_cervical_c-1	B3GAT1	ENSG00000109956.12		chr11	134411671	134411704	GT	0.0820759	1	0.0820759	0.552212
chr1	31653676	31653939	Artery_Tibial	COL16A1	ENSG00000084636.17		chr1	31653747	31653774	AC	0.013816	6	0.0828957	0.554485
chr2	226786311	226794989	Thyroid	IRS1	ENSG00000169047.5		chr2	226781866	226781907	GT	0.0827949	1	0.0827949	0.554485
chr2	196146055	196156439	Whole_Blood	STK17B	ENSG00000081320.10		chr2	196154227	196154262	AAC	0.0832192	1	0.0832192	0.555036
chr7	6331235	6348472	Cells_Cultured_fibroblasts	FAM220A	ENSG00000178397.12		chr7	6337795	6337818	AAAT	0.00647821	13	0.0842168	0.555695
chr10	77404023	77637265	Adipose_Subcutaneous	KCNMA1	ENSG00000156113.22		chr10	77621524	77621547	GT	0.0168534	5	0.0842672	0.555695
chr1	19655200	19656866	Esophagus_Gastroesophageal_Junction	NBL1	ENSG00000158747.13		chr1	19660069	19660104	GTTTTT	0.0279617	3	0.0838851	0.555695
chr20	49094614	49094732	Testis	CSE1L	ENSG00000124207.16		chr20	49098323	49098364	GTT	0.084284	1	0.084284	0.555695
chr4	128511645	128512904	Nerve_Tibial	RP11-420A23.1	ENSG00000251432.6		chr4	128505495	128505522	GT	0.00953326	9	0.0857993	0.558671
chr9	4654804	4656041	Thyroid	SPATA6L	ENSG00000106686.16		chr9	4646124	4646145	GT	0.0107957	8	0.0863656	0.558671
chr21	44304455	44305257	Brain_Cortex	PFKL	ENSG00000141959.16		chr21	44299198	44299229	AC	0.0123107	7	0.086175	0.558671
chr7	32559464	32570020	Lung	AVL9	ENSG00000105778.18		chr7	32556520	32556543	AATG	0.0216054	4	0.0864215	0.558671
chr11	3828206	3840568	Cells_Cultured_fibroblasts	RHOG	ENSG00000177105.9		chr11	3849121	3849160	AC	0.0434097	2	0.0868193	0.558671
chr14	22565137	22588947	Whole_Blood	DAD1	ENSG00000129562.10		chr14	22557893	22557922	AC	0.0865636	1	0.0865636	0.558671
chr18	74263477	74291747	Brain_Caudate_basal_ganglia	CYB5A	ENSG00000166347.18		chr18	74276529	74276562	GT	0.0868666	1	0.0868666	0.558671
chr13	60619141	60654902	Testis	LINC00378	ENSG00000225249.5		chr13	60654878	60654892	CTT	0.0869206	1	0.0869206	0.558671
chr13	60619141	60654902	Testis	LINC01442	ENSG00000227510.3		chr13	60654878	60654892	CTT	0.0869206	1	0.0869206	0.558671
chr16	8780761	8781293	Testis	TMEM186	ENSG00000184857.7		chr16	8789445	8789476	AAAC	0.0876494	1	0.0876494	0.561787
chr10	122428316	122429624	Breast_Mammary_Tissue	PLEKHA1	ENSG00000107679.14		chr10	122429495	122429530	GT	0.00739131	12	0.0886958	0.563827
chr16	65142099	65175166	Ovary	LINC02126	ENSG00000259847.1		chr16	65152052	65152072	AGG	0.0885154	1	0.0885154	0.563827
chr6	154750444	154773989	Testis	SCAF8	ENSG00000213079.9		chr6	154778770	154778809	GT	0.0887029	1	0.0887029	0.563827
chr17	42317224	42319856	Spleen	STAT3	ENSG00000168610.14		chr17	42310779	42310800	GT	0.0890938	1	0.0890938	0.564752
chr2	159780998	159783359	Artery_Tibial	LY75	ENSG00000054219.10		chr2	159792423	159792466	AC	0.0447564	2	0.0895128	0.565849
chr2	61158012	61162842	Skin_Not_Sun_Exposed_Suprapubic	KIAA1841	ENSG00000162929.13		chr2	61155506	61155533	GTTT	0.00191415	47	0.0899651	0.56715
chr19	44672964	44676271	Nerve_Tibial	CEACAM19	ENSG00000186567.12		chr19	44675098	44675137	GT	0.0907036	1	0.0907036	0.570243
chr6	43222641	43222779	Artery_Aorta	CUL9	ENSG00000112659.13		chr6	43230577	43230596	AAAT	0.00835997	11	0.0919597	0.571853
chr17	5487694	5488196	Brain_Spinal_cord_cervical_c-1	MIS12	ENSG00000167842.15		chr17	5492704	5492727	AAAC	0.00917016	10	0.0917016	0.571853
chr21	46124920	46125465	Skin_Not_Sun_Exposed_Suprapubic	COL6A2	ENSG00000142173.14		chr21	46126469	46126478	CCTGG	0.0102254	9	0.0920283	0.571853
chr19	14699281	14705054	Skin_Not_Sun_Exposed_Suprapubic	ZNF333	ENSG00000160961.11		chr19	14715039	14715060	GT	0.0115608	8	0.0924865	0.571853
chr4	47952703	47981393	Adipose_Visceral_Omentum	CNGA1	ENSG00000198515.13		chr4	47946771	47946798	CTTT	0.0132783	7	0.0929478	0.571853
chr19	567624	571440	Colon_Transverse	AC009005.2	ENSG00000267751.5		chr19	576963	576978	GT	0.0231385	4	0.0925538	0.571853
chr10	97264906	97265860	Cells_EBV-transformed_lymphocytes	ARHGAP19	ENSG00000213390.10		chr10	97259829	97259848	AAAAC	0.0463985	2	0.0927969	0.571853
chr12	50768223	50780140	Lung	ATF1	ENSG00000123268.8		chr12	50772677	50772694	CT	0.0912127	1	0.0912127	0.571853
chr2	61158012	61162842	Skin_Not_Sun_Exposed_Suprapubic	C2orf74	ENSG00000237651.6		chr2	61155506	61155533	GTTT	0.00191415	49	0.0937934	0.573245
chr17	81108509	81115770	Pituitary	BAIAP2	ENSG00000175866.15		chr17	81098966	81099005	ATCCCCCC	0.00469726	20	0.0939452	0.573245
chr17	42659946	42660149	Heart_Atrial_Appendage	TUBG2	ENSG00000037042.8		chr17	42668819	42668845	AAC	0.00786703	12	0.0944043	0.573245
chr15	23976243	23979071	Testis	PWRN4	ENSG00000260232.1		chr15	23981286	23981305	ATTT	0.0472099	2	0.0944198	0.573245
chr12	51313903	51324022	Adrenal_Gland	BIN2	ENSG00000110934.10		chr12	51324944	51324983	ATTT	0.0941429	1	0.0941429	0.573245
chr5	74636498	74640307	Skin_Not_Sun_Exposed_Suprapubic	ENC1	ENSG00000171617.13		chr5	74637756	74637793	AC	0.0952778	1	0.0952778	0.576668
chr1	182791639	182792232	Whole_Blood	NPL	ENSG00000135838.13		chr1	182790614	182790655	GTT	0.0954847	1	0.0954847	0.576668
chr11	57696043	57696761	Artery_Aorta	ZDHHC5	ENSG00000156599.10		chr11	57698119	57698148	AC	0.0959806	1	0.0959806	0.578145
chr14	24165183	24165847	Esophagus_Gastroesophageal_Junction	IRF9	ENSG00000213928.8		chr14	24169543	24169558	CT	0.0963009	1	0.0963009	0.57856
chr6	138779985	138782340	Muscle_Skeletal	CCDC28A	ENSG00000024862.17		chr6	138774937	138774966	GTTTT	0.0968031	1	0.0968031	0.580062
chr9	34179240	34216674	Brain_Amygdala	UBAP1	ENSG00000165006.13		chr9	34196899	34196936	GT	0.0139028	7	0.0973195	0.581191
chr1	26572476	26573224	Lung	RPS6KA1	ENSG00000117676.13		chr1	26565544	26565568	CTTTT	0.0244373	4	0.0977493	0.581191
chr10	45553204	45594235	Adrenal_Gland	2022-03-08	ENSG00000165406.15		chr10	45594604	45594633	CTGGG	0.0976103	1	0.0976103	0.581191
chr3	141386937	141396259	Artery_Tibial	ZBTB38	ENSG00000177311.11		chr3	141378362	141378377	AC	0.0496265	2	0.0992529	0.588611
chr22	46043699	46044609	Thyroid	LINC00899	ENSG00000231711.2		chr22	46047253	46047276	GTTT	0.0167103	6	0.100262	0.590559
chr1	219449233	219458858	Adipose_Subcutaneous	RP11-392O17.1	ENSG00000228536.2		chr1	219462747	219462778	GT	0.0500058	2	0.100012	0.590559
chr20	63736186	63737533	Artery_Coronary	LIME1	ENSG00000203896.9		chr20	63726516	63726535	GTTT	0.100422	1	0.100422	0.590559
chr5	150446963	150447474	Brain_Cerebellar_Hemisphere	RPS14	ENSG00000164587.11		chr5	150437248	150437279	AGGC	0.100608	1	0.100608	0.590559
chr19	872118	872913	Skin_Not_Sun_Exposed_Suprapubic	MED16	ENSG00000175221.14		chr19	864043	864060	AC	0.0112079	9	0.100871	0.590596
chr3	197063	319683	Skin_Sun_Exposed_Lower_leg	CHL1	ENSG00000134121.9		chr3	228479	228502	AC	0.101462	1	0.101462	0.59126
chr7	36239036	36281115	Prostate	EEPD1	ENSG00000122547.10		chr7	36248995	36249034	AC	0.101498	1	0.101498	0.59126
chr7	37950094	37950200	Artery_Aorta	EPDR1	ENSG00000086289.11		chr7	37953669	37953696	GTTT	0.00859179	12	0.103101	0.594555
chr11	47243321	47245305	Artery_Aorta	ACP2	ENSG00000134575.9		chr11	47245858	47245885	AC	0.0513825	2	0.102765	0.594555
chr16	56639329	56639859	Adipose_Visceral_Omentum	MT1A	ENSG00000205362.11		chr16	56631017	56631036	GT	0.0515871	2	0.103174	0.594555
chr9	37442555	37465215	Skin_Sun_Exposed_Lower_leg	ZBTB5	ENSG00000168795.4		chr9	37465989	37466008	GT	0.102588	1	0.102588	0.594555
chr11	58616815	58617196	Testis	ZFP91	ENSG00000186660.14		chr11	58617071	58617098	GT	0.103356	1	0.103356	0.594555
chr3	113162019	113165054	Testis	RP11-572M11.4	ENSG00000240057.5		chr3	113173219	113173238	AAGG	0.103903	1	0.103903	0.596212
chr2	100563073	100566503	Adipose_Subcutaneous	PDCL3	ENSG00000115539.13		chr2	100564286	100564305	GTTT	0.0209378	5	0.104689	0.596893
chr20	44531978	44589797	Muscle_Skeletal	PKIG	ENSG00000168734.13		chr20	44560250	44560281	AAAT	0.0209853	5	0.104926	0.596893
chr5	178053973	178054058	Pituitary	FAM153C	ENSG00000204677.10		chr5	178062864	178062885	AG	0.0261601	4	0.10464	0.596893
chr6	160349058	160397979	Artery_Tibial	SLC22A3	ENSG00000146477.5		chr6	160400656	160400679	AC	0.0351062	3	0.105319	0.596893
chr10	59738562	59753354	Muscle_Skeletal	MRLN	ENSG00000227877.6		chr10	59758738	59758757	AAAC	0.105239	1	0.105239	0.596893
chr20	46728319	46729353	Cells_Cultured_fibroblasts	SLC2A10	ENSG00000197496.5		chr20	46736387	46736400	AC	0.0352034	3	0.10561	0.597073
chr4	11722615	11770309	Testis	RP11-281P23.2	ENSG00000249631.5		chr4	11773914	11773943	AC	0.106627	1	0.106627	0.601344
chr1	113698387	113698992	Muscle_Skeletal	PHTF1	ENSG00000116793.15		chr1	113698153	113698188	GT	0.0214926	5	0.107463	0.601748
chr1	33165566	33181025	Skin_Not_Sun_Exposed_Suprapubic	TRIM62	ENSG00000116525.13		chr1	33182601	33182634	AC	0.107336	1	0.107336	0.601748
chr19	55056808	55062968	Cells_EBV-transformed_lymphocytes	RDH13	ENSG00000160439.15		chr19	55063046	55063059	ACGCCTG	0.107483	1	0.107483	0.601748
chr1	212230259	212234503	Heart_Atrial_Appendage	RP11-15I11.3	ENSG00000226251.5		chr1	212223315	212223350	AC	0.0360735	3	0.10822	0.604406
chr17	50139581	50140093	Skin_Sun_Exposed_Lower_leg	PPP1R9B	ENSG00000108819.10		chr17	50138154	50138195	GT	0.00726154	15	0.108923	0.605391
chr11	15589250	15622305	Whole_Blood	RP11-531H8.2	ENSG00000254789.2		chr11	15596091	15596150	GT	0.108735	1	0.108735	0.605391
chr10	86972505	86972924	Skin_Sun_Exposed_Lower_leg	MMRN2	ENSG00000173269.13		chr10	86972849	86972878	GT	0.0550059	2	0.110012	0.606916
chr10	86972505	86972924	Skin_Sun_Exposed_Lower_leg	ADIRF-AS1	ENSG00000272734.1		chr10	86972849	86972878	GT	0.0550059	2	0.110012	0.606916
chr4	185055237	185062457	Testis	RP11-386B13.1	ENSG00000249520.1		chr4	185062843	185062862	GTTT	0.110253	1	0.110253	0.606916
chr4	185055237	185062457	Testis	RP11-386B13.3	ENSG00000250754.5		chr4	185062843	185062862	GTTT	0.110253	1	0.110253	0.606916
chr10	97679915	97686766	Adipose_Visceral_Omentum	AVPI1	ENSG00000119986.6		chr10	97696449	97696475	GTT	0.00235666	48	0.11312	0.614205
chr15	64751638	64775233	Adipose_Subcutaneous	RBPMS2	ENSG00000166831.8		chr15	64782807	64782824	GT	0.0141034	8	0.112827	0.614205
chr12	68641153	68648699	Cells_Cultured_fibroblasts	RAP1B	ENSG00000127314.17		chr12	68657726	68657773	AC	0.0161651	7	0.113156	0.614205
chr22	46530500	46533627	Lung	CELSR1	ENSG00000075275.16		chr22	46531186	46531221	AAAT	0.0281186	4	0.112475	0.614205
chr2	233761151	233767034	Liver	UGT1A6	ENSG00000167165.18		chr2	233760234	233760247	AT	0.0560092	2	0.112018	0.614205
chr3	4420146	4452876	Thyroid	SUMF1	ENSG00000144455.13		chr3	4423280	4423315	GT	0.113178	1	0.113178	0.614205
chr1	53888986	53889244	Brain_Putamen_basal_ganglia	YIPF1	ENSG00000058799.14		chr1	53897475	53897494	AAAAT	0.0028343	41	0.116206	0.617214
chr1	16315435	16352255	Skin_Sun_Exposed_Lower_leg	FBXO42	ENSG00000037637.10		chr1	16317602	16317625	GTTT	0.00364965	33	0.120438	0.617214
chr19	6754932	6759594	Thyroid	SH2D3A	ENSG00000125731.12		chr19	6758134	6758153	AAAAT	0.0105908	11	0.116499	0.617214
chr2	159783469	159798132	Lung	CD302	ENSG00000241399.6		chr2	159792423	159792466	AC	0.0130611	9	0.11755	0.617214
chr15	90231507	90233669	Colon_Sigmoid	CIB1	ENSG00000185043.10		chr15	90239306	90239339	GT	0.0132881	9	0.119593	0.617214
chr2	3533848	3534113	Esophagus_Muscularis	AC108488.4	ENSG00000242282.6		chr2	3528275	3528294	AC	0.0133476	9	0.120128	0.617214
chr11	134371830	134373721	Thyroid	GLB1L2	ENSG00000149328.14		chr11	134382307	134382318	AC	0.0196101	6	0.117661	0.617214
chr17	6758224	6759256	Thyroid	XAF1	ENSG00000132530.16		chr17	6750443	6750474	AC	0.0197257	6	0.118354	0.617214
chr2	73927052	73958146	Skin_Sun_Exposed_Lower_leg	DGUOK	ENSG00000114956.19		chr2	73920534	73920569	CCT	0.0232945	5	0.116473	0.617214
chr1	169609689	169612217	Breast_Mammary_Tissue	SELP	ENSG00000174175.16		chr1	169610780	169610815	GTTT	0.0295005	4	0.118002	0.617214
chr11	67433216	67433340	Cells_EBV-transformed_lymphocytes	RPS6KB2	ENSG00000175634.14		chr11	67424862	67424891	AC	0.0394896	3	0.118469	0.617214
chr12	31960871	31980878	Artery_Tibial	KIAA1551	ENSG00000174718.11		chr12	31987720	31987751	ATTT	0.0577791	2	0.115558	0.617214
chr12	21559710	21560386	Liver	GYS2	ENSG00000111713.2		chr12	21550315	21550352	GT	0.114008	1	0.114008	0.617214
chr7	137254974	137343439	Thyroid	PTN	ENSG00000105894.11		chr7	137326943	137326970	AATG	0.114957	1	0.114957	0.617214
chr11	73817947	73825708	Thyroid	MRPL48	ENSG00000175581.13		chr11	73820740	73820751	AT	0.115648	1	0.115648	0.617214
chr1	161222994	161223350	Liver	APOA2	ENSG00000158874.11		chr1	161223056	161223093	GT	0.115833	1	0.115833	0.617214
chr2	169875949	169878525	Muscle_Skeletal	UBR3	ENSG00000144357.16		chr2	169876532	169876566	ATTGT	0.115887	1	0.115887	0.617214
chr15	30832898	30899483	Testis	HERC2P10	ENSG00000259845.1		chr15	30889630	30889664	GTTTT	0.117087	1	0.117087	0.617214
chr9	83820439	83829607	Testis	RP11-575L7.2	ENSG00000226877.7		chr9	83825820	83825849	AC	0.118364	1	0.118364	0.617214
chr9	83820439	83829607	Testis	RP11-575L7.4	ENSG00000231616.8		chr9	83825820	83825849	AC	0.118364	1	0.118364	0.617214
chr1	150511198	150512352	Skin_Not_Sun_Exposed_Suprapubic	ECM1	ENSG00000143369.14		chr1	150506575	150506606	AC	0.119078	1	0.119078	0.617214
chr12	103980072	103980893	Skin_Not_Sun_Exposed_Suprapubic	TDG	ENSG00000139372.14		chr12	103976409	103976436	AC	0.119141	1	0.119141	0.617214
chr4	5438288	5446673	Testis	STK32B	ENSG00000152953.12		chr4	5453225	5453244	AG	0.119189	1	0.119189	0.617214
chr4	122318270	122324427	Adipose_Subcutaneous	KIAA1109	ENSG00000138688.15		chr4	122327100	122327134	GTTTT	0.119716	1	0.119716	0.617214
chr19	5835077	5838677	Esophagus_Mucosa	FUT6	ENSG00000156413.13		chr19	5846354	5846385	ATTT	0.120237	1	0.120237	0.617214
chr10	59324106	59352270	Testis	FAM13C	ENSG00000148541.12		chr10	59317127	59317154	AC	0.00683972	18	0.123115	0.620501
chr10	70209685	70213463	Brain_Spinal_cord_cervical_c-1	PPA1	ENSG00000180817.11		chr10	70223218	70223235	CT	0.0135373	9	0.121836	0.620501
chr17	1937808	2024853	Skin_Sun_Exposed_Lower_leg	RTN4RL1	ENSG00000185924.6		chr17	2010730	2010757	GTTT	0.0206294	6	0.123777	0.620501
chr9	137374763	137377074	Pituitary	EXD3	ENSG00000187609.15		chr9	137381099	137381122	GT	0.0308396	4	0.123358	0.620501
chr9	128824869	128824977	Artery_Tibial	SPOUT1	ENSG00000198917.12		chr9	128832900	128832938	GTT	0.0411724	3	0.123517	0.620501
chr15	30975003	30976819	Adipose_Visceral_Omentum	MTMR10	ENSG00000166912.16		chr15	30968535	30968576	GT	0.061294	2	0.122588	0.620501
chr16	954666	981145	Brain_Frontal_Cortex_BA9	RP11-161M6.2	ENSG00000260807.6		chr16	954959	954970	GT	0.121731	1	0.121731	0.620501
chr1	212333598	212345803	Artery_Tibial	PPP2R5A	ENSG00000066027.11		chr1	212354726	212354747	AG	0.122351	1	0.122351	0.620501
chr14	76837971	76839195	Testis	LRRC74A	ENSG00000100565.15		chr14	76842660	76842687	ATTC	0.12265	1	0.12265	0.620501
chr7	19943488	19960922	Testis	AC005062.2	ENSG00000243004.5		chr7	19943102	19943139	AC	0.123282	1	0.123282	0.620501
chr15	99720452	99720784	Adipose_Subcutaneous	LYSMD4	ENSG00000183060.15		chr15	99718910	99718941	GT	0.0028928	43	0.124391	0.620874
chr15	65055274	65058427	Brain_Nucleus_accumbens_basal_ganglia	RASL12	ENSG00000103710.10		chr15	65051768	65051787	AAAC	0.031096	4	0.124384	0.620874
chr3	197546486	197547135	Skin_Sun_Exposed_Lower_leg	BDH1	ENSG00000161267.11		chr3	197547102	197547117	GT	0.00665075	19	0.126364	0.625847
chr19	52406643	52415124	Colon_Sigmoid	ZNF528	ENSG00000167555.13		chr19	52400228	52400265	AC	0.00900877	14	0.126123	0.625847
chr4	99089284	99133555	Artery_Coronary	RP11-696N14.1	ENSG00000246090.6		chr4	99086038	99086057	GTTT	0.0115865	11	0.127451	0.625847
chr14	21489403	21492296	Esophagus_Muscularis	TOX4	ENSG00000092203.13		chr14	21493739	21493763	GTTTT	0.0140715	9	0.126643	0.625847
chr1	109629490	109630233	Breast_Mammary_Tissue	AMPD2	ENSG00000116337.15		chr1	109638059	109638082	ATTT	0.0159279	8	0.127423	0.625847
chr19	56334745	56363235	Testis	AC006116.21	ENSG00000267606.1		chr19	56326306	56326337	GT	0.0641451	2	0.12829	0.625847
chr7	156432879	156432970	Colon_Transverse	AC073133.2	ENSG00000228569.1		chr7	156441383	156441406	ATTT	0.0641895	2	0.128379	0.625847
chr7	156432879	156432970	Colon_Transverse	AC073133.1	ENSG00000233878.1		chr7	156441383	156441406	ATTT	0.0641895	2	0.128379	0.625847
chr2	237749324	237753309	Esophagus_Gastroesophageal_Junction	LRRFIP1	ENSG00000124831.18		chr2	237758224	237758245	GT	0.125751	1	0.125751	0.625847
chr5	12888284	12901946	Testis	LINC02220	ENSG00000248457.1		chr5	12883371	12883402	GT	0.127099	1	0.127099	0.625847
chr19	55160010	55160640	Thyroid	DNAAF3	ENSG00000167646.13		chr19	55169934	55169953	ATTT	0.127819	1	0.127819	0.625847
chr17	42689047	42689521	Muscle_Skeletal	CNTNAP1	ENSG00000108797.11		chr17	42698446	42698481	GT	0.128661	1	0.128661	0.625894
chr4	25409791	25414324	Breast_Mammary_Tissue	ANAPC4	ENSG00000053900.10		chr4	25422754	25422785	GT	0.0647942	2	0.129588	0.629078
chr10	80512269	80512719	Whole_Blood	TSPAN14	ENSG00000108219.14		chr10	80512872	80512898	GTT	0.00390722	34	0.132845	0.63019
chr6	26411581	26413169	Skin_Sun_Exposed_Lower_leg	BTN3A1	ENSG00000026950.16		chr6	26422160	26422174	CCT	0.00409438	32	0.13102	0.63019
chr3	37980863	37981825	Colon_Transverse	CTDSPL	ENSG00000144677.14		chr3	37987803	37987822	AC	0.00879008	15	0.131851	0.63019
chr4	185164179	185175786	Skin_Not_Sun_Exposed_Suprapubic	CFAP97	ENSG00000164323.12		chr4	185175239	185175260	AG	0.0218302	6	0.130981	0.63019
chr7	106020544	106024381	Esophagus_Gastroesophageal_Junction	CDHR3	ENSG00000128536.15		chr7	106020036	106020049	GT	0.0267045	5	0.133523	0.63019
chr11	129884882	129885435	Esophagus_Muscularis	NFRKB	ENSG00000170322.14		chr11	129889952	129889983	AC	0.0438999	3	0.1317	0.63019
chr16	1067043	1073087	Heart_Left_Ventricle	SSTR5-AS1	ENSG00000261713.6		chr16	1067104	1067123	AAAC	0.0442122	3	0.132637	0.63019
chr15	78163780	78166150	Colon_Transverse	IDH3A	ENSG00000166411.13		chr15	78165682	78165701	ATTT	0.0659573	2	0.131915	0.63019
chr4	44711137	44726474	Esophagus_Gastroesophageal_Junction	GNPDA2	ENSG00000163281.11		chr4	44734577	44734600	GTTT	0.0660069	2	0.132014	0.63019
chr10	49679794	49693774	Testis	C10orf53	ENSG00000178645.12		chr10	49702226	49702257	AGGG	0.131226	1	0.131226	0.63019
chr2	99161668	99169550	Brain_Nucleus_accumbens_basal_ganglia	MITD1	ENSG00000158411.11		chr2	99165020	99165061	GT	0.131453	1	0.131453	0.63019
chr14	66492900	66496827	Testis	LINC00238	ENSG00000196553.14		chr14	66486591	66486614	CT	0.132446	1	0.132446	0.63019
chr1	246781627	246789617	Brain_Cerebellum	LINC01341	ENSG00000227953.6		chr1	246788447	246788471	GTTTT	0.133347	1	0.133347	0.63019
chr2	233832279	233832505	Testis	MROH2A	ENSG00000185038.14		chr2	233837286	233837313	GTTT	0.133652	1	0.133652	0.63019
chr7	108515574	108526029	Esophagus_Mucosa	PNPLA8	ENSG00000135241.16		chr7	108526355	108526374	ACGC	0.00569608	24	0.136706	0.630924
chr16	87303075	87305719	Cells_Cultured_fibroblasts	C16orf95	ENSG00000260456.6		chr16	87308477	87308520	ATTT	0.0193142	7	0.1352	0.630924
chr11	66478096	66480039	Muscle_Skeletal	CTD-3074O7.5	ENSG00000255517.6		chr11	66485913	66485952	CTTTT	0.0339815	4	0.135926	0.630924
chr16	88727661	88731706	Thyroid	PIEZO1	ENSG00000103335.21		chr16	88739847	88739864	CCCTGG	0.034534	4	0.138136	0.630924
chr6	31177899	31186026	Small_Intestine_Terminal_Ileum	PSORS1C3	ENSG00000204528.3		chr6	31194097	31194116	AAAT	0.045231	3	0.135693	0.630924
chr6	31177899	31186026	Small_Intestine_Terminal_Ileum	POU5F1	ENSG00000204531.17		chr6	31194097	31194116	AAAT	0.045231	3	0.135693	0.630924
chr11	537605	539580	Pituitary	LRRC56	ENSG00000161328.10		chr11	548452	548475	GTTT	0.0454946	3	0.136484	0.630924
chr2	33273781	33274965	Artery_Aorta	LTBP1	ENSG00000049323.15		chr2	33269102	33269133	ATTC	0.0455006	3	0.136502	0.630924
chr6	116752695	116761977	Colon_Transverse	ZUFSP	ENSG00000153975.9		chr6	116771068	116771102	AAAAC	0.135167	1	0.135167	0.630924
chr7	100896452	100896553	Brain_Hypothalamus	ACHE	ENSG00000087085.13		chr7	100889742	100889776	AGGGG	0.135722	1	0.135722	0.630924
chr2	30987047	30991168	Testis	AC009305.1	ENSG00000234579.1		chr2	30985153	30985172	ATTC	0.136601	1	0.136601	0.630924
chr1	24169601	24180731	Testis	IFNLR1	ENSG00000185436.11		chr1	24182919	24182946	ATTT	0.137334	1	0.137334	0.630924
chr19	52397267	52397462	Adipose_Visceral_Omentum	ZNF528-AS1	ENSG00000269834.5		chr19	52400228	52400265	AC	0.137492	1	0.137492	0.630924
chr1	47434641	47437290	Artery_Tibial	LINC01389	ENSG00000225762.1		chr1	47442394	47442425	GT	0.137824	1	0.137824	0.630924
chr1	47434641	47437290	Artery_Tibial	FOXD2-AS1	ENSG00000237424.1		chr1	47442394	47442425	GT	0.137824	1	0.137824	0.630924
chr5	75275505	75334947	Testis	CTD-2235C13.2	ENSG00000247372.2		chr5	75333342	75333385	GT	0.138195	1	0.138195	0.630924
chr17	55774859	55776035	Testis	PCTP	ENSG00000141179.13		chr17	55781914	55781935	GT	0.0693748	2	0.13875	0.632042
chr14	89246854	89280950	Testis	FOXN3	ENSG00000053254.15		chr14	89242314	89242327	AT	0.139228	1	0.139228	0.632042
chr11	6395701	6395786	Thyroid	APBB1	ENSG00000166313.18		chr11	6390707	6390736	CGCTGG	0.139264	1	0.139264	0.632042
chr4	344430	372664	Lung	ZNF141	ENSG00000131127.13		chr4	371543	371560	GT	0.0117202	12	0.140642	0.632481
chr13	100449305	100527675	Esophagus_Mucosa	PCCA	ENSG00000175198.15		chr13	100517047	100517090	GT	0.0702847	2	0.140569	0.632481
chr10	70124097	70132947	Brain_Cortex	TYSND1	ENSG00000156521.13		chr10	70132770	70132787	AGCGGG	0.13973	1	0.13973	0.632481
chr16	85708066	85710164	Cells_Cultured_fibroblasts	C16orf74	ENSG00000154102.10		chr16	85700870	85700881	GTTT	0.140218	1	0.140218	0.632481
chr5	149996429	149999928	Testis	TIGD6	ENSG00000164296.6		chr5	150008056	150008099	AC	0.140735	1	0.140735	0.632481
chr18	47870564	47896521	Testis	SMAD2	ENSG00000175387.15		chr18	47879496	47879527	GT	0.142142	1	0.142142	0.636783
chr19	27746340	27771664	Brain_Hypothalamus	LINC00662	ENSG00000261824.6		chr19	27774808	27774825	CT	0.142245	1	0.142245	0.636783
chr9	113178801	113182766	Nerve_Tibial	FKBP15	ENSG00000119321.8		chr9	113180401	113180432	AC	0.0131164	11	0.14428	0.640905
chr9	128635175	128635658	Small_Intestine_Terminal_Ileum	WDR34	ENSG00000119333.11		chr9	128641977	128642002	GT	0.0180298	8	0.144238	0.640905
chr22	37765817	37768074	Muscle_Skeletal	TRIOBP	ENSG00000100106.19		chr22	37773178	37773225	GGTT	0.0479482	3	0.143844	0.640905
chr6	149729518	149731613	Esophagus_Gastroesophageal_Junction	NUP43	ENSG00000120253.13		chr6	149720691	149720726	AC	0.144227	1	0.144227	0.640905
chr12	7136391	7136829	Pituitary	CLSTN3	ENSG00000139182.13		chr12	7145347	7145370	GT	0.0105588	14	0.147823	0.644207
chr11	44081320	44082065	Breast_Mammary_Tissue	ACCS	ENSG00000110455.13		chr11	44072149	44072176	ATTT	0.0182517	8	0.146014	0.644207
chr12	6443717	6446961	Prostate	CD27-AS1	ENSG00000215039.6		chr12	6446777	6446800	AC	0.0184555	8	0.147644	0.644207
chr1	154589928	154590184	Cells_Cultured_fibroblasts	ADAR	ENSG00000160710.15		chr1	154581772	154581807	AATC	0.0365864	4	0.146346	0.644207
chr18	4264901	4280730	Cells_EBV-transformed_lymphocytes	DLGAP1-AS5	ENSG00000261520.5		chr18	4278748	4278761	AC	0.0729616	2	0.145923	0.644207
chr13	48090418	48127543	Brain_Cerebellar_Hemisphere	MED4	ENSG00000136146.14		chr13	48123028	48123052	ATCCT	0.14579	1	0.14579	0.644207
chr4	142384116	142402938	Testis	INPP4B	ENSG00000109452.12		chr4	142409500	142409523	ATTT	0.147029	1	0.147029	0.644207
chr14	35122052	35122952	Cells_Cultured_fibroblasts	KIAA0391	ENSG00000100890.15		chr14	35132903	35132932	GTTTT	0.147119	1	0.147119	0.644207
chr1	212831471	212835873	Testis	NSL1	ENSG00000117697.14		chr1	212827091	212827118	AAAC	0.147644	1	0.147644	0.644207
chr1	212831471	212835873	Testis	SPATA45	ENSG00000185523.6		chr1	212827091	212827118	AAAC	0.147644	1	0.147644	0.644207
chr12	101737952	101739285	Testis	SYCP3	ENSG00000139351.14		chr12	101736709	101736740	GT	0.148392	1	0.148392	0.645464
chr19	39457740	39458818	Cells_Cultured_fibroblasts	SUPT5H	ENSG00000196235.13		chr19	39458232	39458273	ACC	0.0124229	12	0.149075	0.646145
chr1	244424387	244432545	Heart_Atrial_Appendage	ADSS	ENSG00000035687.9		chr1	244442243	244442268	GT	0.074836	2	0.149672	0.646145
chr22	32327437	32343012	Testis	RP1-149A16.12	ENSG00000234626.1		chr22	32329511	32329522	AC	0.149254	1	0.149254	0.646145
chr16	1765178	1765960	Thyroid	MAPK8IP3	ENSG00000138834.12		chr16	1756624	1756669	AC	0.149597	1	0.149597	0.646145
chr1	11841207	11842650	Small_Intestine_Terminal_Ileum	NPPA-AS1	ENSG00000242349.5		chr1	11852188	11852212	AAAAT	0.0188251	8	0.150601	0.647724
chr3	98718521	98732426	Brain_Hippocampus	ST3GAL6-AS1	ENSG00000239445.5		chr3	98741052	98741083	GT	0.150444	1	0.150444	0.647724
chr10	114861334	114899490	Testis	FAM160B1	ENSG00000151553.14		chr10	114880681	114880710	AC	0.151157	1	0.151157	0.648903
chr20	62353208	62356192	Adrenal_Gland	LAMA5-AS1	ENSG00000228812.7		chr20	62354328	62354355	CCCT	0.0506825	3	0.152047	0.651511
chr2	102154017	102156146	Cells_Cultured_fibroblasts	IL1R1	ENSG00000115594.11		chr2	102148946	102148981	AAAC	0.017004	9	0.153036	0.652447
chr7	103490040	103490178	Testis	CTB-107G13.1	ENSG00000234715.1		chr7	103489204	103489229	GT	0.153126	1	0.153126	0.652447
chr5	142614161	142621297	Artery_Tibial	FGF1	ENSG00000113578.17		chr5	142625314	142625351	AC	0.153135	1	0.153135	0.652447
chr1	24081850	24086750	Testis	RP11-293P20.2	ENSG00000225315.2		chr1	24075077	24075106	CTTTT	0.153692	1	0.153692	0.652447
chr1	24081850	24086750	Testis	RP11-293P20.4	ENSG00000230703.1		chr1	24075077	24075106	CTTTT	0.153692	1	0.153692	0.652447
chr3	8659801	8663744	Testis	SSUH2	ENSG00000125046.14		chr3	8656863	8656894	AAAC	0.153967	1	0.153967	0.652447
chr4	26321048	26386353	Adipose_Subcutaneous	RBPJ	ENSG00000168214.20		chr4	26358021	26358052	GT	0.154325	1	0.154325	0.652762
chr10	28069852	28089671	Artery_Tibial	MPP7	ENSG00000150054.18		chr10	28062532	28062581	GT	0.0773737	2	0.154747	0.653346
chr4	186256087	186258021	Liver	KLKB1	ENSG00000164344.15		chr4	186257745	186257780	GT	0.155244	1	0.155244	0.654242
chr15	41525165	41526898	Nerve_Tibial	RPAP1	ENSG00000103932.11		chr15	41516830	41516873	ATCT	0.0224104	7	0.156873	0.658456
chr1	245059458	245082083	Thyroid	EFCAB2	ENSG00000203666.12		chr1	245082687	245082716	ATTTT	0.0224432	7	0.157102	0.658456
chr6	10491816	10509087	Testis	GCNT2	ENSG00000111846.16		chr6	10486756	10486769	AC	0.156711	1	0.156711	0.658456
chr5	133006920	133026497	Esophagus_Mucosa	ZCCHC10	ENSG00000155329.11		chr5	133031825	133031852	AAAC	0.15836	1	0.15836	0.662519
chr5	149407078	149420481	Artery_Tibial	CARMN	ENSG00000249669.9		chr5	149416932	149416951	AAAAC	0.00756737	21	0.158915	0.663405
chr7	29001055	29001205	Testis	AC005013.5	ENSG00000228421.2		chr7	29007753	29007774	AC	0.159436	1	0.159436	0.663405
chr7	29001055	29001205	Testis	CTB-113D17.1	ENSG00000272568.5		chr7	29007753	29007774	AC	0.159436	1	0.159436	0.663405
chr15	74370078	74401526	Cells_EBV-transformed_lymphocytes	CYP11A1	ENSG00000140459.17		chr15	74368987	74369010	AC	0.159828	1	0.159828	0.663599
chr3	24337371	24494687	Skin_Sun_Exposed_Lower_leg	THRB	ENSG00000151090.17		chr3	24417096	24417139	GT	0.160445	1	0.160445	0.663599
chr1	22569353	22576217	Pituitary	EPHA8	ENSG00000070886.11		chr1	22585028	22585051	GT	0.160647	1	0.160647	0.663599
chr6	5109491	5216618	Liver	LYRM4	ENSG00000214113.10		chr6	5170483	5170510	AAAT	0.160753	1	0.160753	0.663599
chr12	122871061	122895952	Vagina	VPS37B	ENSG00000139722.6		chr12	122899051	122899094	GT	0.16108	1	0.16108	0.663599
chr7	4781754	4782796	Artery_Tibial	AP5Z1	ENSG00000242802.6		chr7	4777354	4777385	ATTT	0.161213	1	0.161213	0.663599
chr12	55834726	55834851	Testis	TMEM198B	ENSG00000182796.13		chr12	55841511	55841554	AAGG	0.00642051	26	0.166933	0.666166
chr8	17265981	17268258	Cells_Cultured_fibroblasts	VPS37A	ENSG00000155975.9		chr8	17262574	17262599	GT	0.0106094	16	0.169751	0.666166
chr13	36335832	36346582	Stomach	SPG20	ENSG00000133104.12		chr13	36330430	36330453	GT	0.0109634	15	0.164451	0.666166
chr1	201520650	201521441	Brain_Caudate_basal_ganglia	RP11-134G8.5	ENSG00000223396.2		chr1	201529589	201529618	GTT	0.0137646	12	0.165175	0.666166
chr1	201520650	201521441	Brain_Caudate_basal_ganglia	RP11-134G8.7	ENSG00000224536.2		chr1	201529589	201529618	GTT	0.0137646	12	0.165175	0.666166
chr8	98106326	98117032	Brain_Anterior_cingulate_cortex_BA24	RIDA	ENSG00000132541.10		chr8	98112196	98112223	GT	0.0182039	9	0.163835	0.666166
chr5	134624037	134632077	Colon_Transverse	SAR1B	ENSG00000152700.13		chr5	134621476	134621515	ATTT	0.0183941	9	0.165547	0.666166
chr13	75569507	75589938	Skin_Sun_Exposed_Lower_leg	UCHL3	ENSG00000118939.17		chr13	75563128	75563163	ATGT	0.0272698	6	0.163619	0.666166
chr2	54659999	54664453	Colon_Sigmoid	SPTBN1	ENSG00000115306.15		chr2	54673060	54673091	AC	0.041043	4	0.164172	0.666166
chr22	42571883	42574680	Skin_Sun_Exposed_Lower_leg	RRP7BP	ENSG00000182841.12		chr22	42564968	42564987	GT	0.0423985	4	0.169594	0.666166
chr16	10547677	10580549	Skin_Not_Sun_Exposed_Suprapubic	EMP2	ENSG00000213853.9		chr16	10558479	10558506	AC	0.0816083	2	0.163217	0.666166
chr4	141226846	141230166	Muscle_Skeletal	ZNF330	ENSG00000109445.10		chr4	141218023	141218070	NA	0.082469	2	0.164938	0.666166
chr2	3558998	3559404	Heart_Atrial_Appendage	RNASEH1-AS1	ENSG00000234171.2		chr2	3560493	3560540	CCTT	0.0830632	2	0.166126	0.666166
chr6	108988687	108990645	Testis	SESN1	ENSG00000080546.13		chr6	108991229	108991254	AC	0.0838457	2	0.167691	0.666166
chr12	110936698	110938290	Muscle_Skeletal	LINC01405	ENSG00000185847.7		chr12	110942818	110942839	AC	0.0846042	2	0.169208	0.666166
chr19	56225048	56313283	Testis	ZSCAN5A	ENSG00000131848.9		chr19	56230616	56230655	AC	0.163282	1	0.163282	0.666166
chr15	99703385	99706729	Muscle_Skeletal	MEF2A	ENSG00000068305.17		chr15	99695542	99695569	GT	0.164191	1	0.164191	0.666166
chr22	17191810	17203563	Adipose_Subcutaneous	CECR1	ENSG00000093072.15		chr22	17200195	17200210	GTTT	0.167816	1	0.167816	0.666166
chr19	51136130	51136693	Whole_Blood	SIGLEC9	ENSG00000129450.8		chr19	51138840	51138867	AATG	0.167946	1	0.167946	0.666166
chr19	51136130	51136693	Whole_Blood	CTD-3187F8.15	ENSG00000267990.1		chr19	51138840	51138867	AATG	0.167946	1	0.167946	0.666166
chr16	9938551	10179998	Testis	GRIN2A	ENSG00000183454.16		chr16	9988543	9988562	AG	0.168234	1	0.168234	0.666166
chr2	218622878	218632136	Muscle_Skeletal	PLCD4	ENSG00000115556.13		chr2	218618090	218618121	AAAC	0.168267	1	0.168267	0.666166
chr12	119998736	120061710	Testis	BICDL1	ENSG00000135127.11		chr12	120013440	120013483	GT	0.168312	1	0.168312	0.666166
chr6	29944397	30261587	Adipose_Subcutaneous	HLA-L	ENSG00000243753.5		chr6	30138067	30138090	AC	0.168744	1	0.168744	0.666166
chr9	2948282	2949501	Testis	CARM1P1	ENSG00000227835.8		chr9	2957926	2957950	GTTTT	0.169031	1	0.169031	0.666166
chr20	58218805	58219430	Testis	ANKRD60	ENSG00000124227.5		chr20	58220684	58220729	AC	0.169306	1	0.169306	0.666166
chr11	33775363	33776189	Testis	FBXO3-AS1	ENSG00000254508.5		chr11	33767027	33767041	CTG	0.170018	1	0.170018	0.666166
chr11	33775363	33776189	Testis	RP11-646J21.6	ENSG00000255272.1		chr11	33767027	33767041	CTG	0.170018	1	0.170018	0.666166
chr13	21262574	21278049	Testis	ESRRAP2	ENSG00000235438.7		chr13	21280759	21280778	ATCT	0.170503	1	0.170503	0.666166
chr1	22643714	22647227	Nerve_Tibial	C1QC	ENSG00000159189.11		chr1	22643381	22643412	AC	0.170522	1	0.170522	0.666166
chr10	85620033	85647202	Brain_Amygdala	GRID1	ENSG00000182771.18		chr10	85631986	85632015	GT	0.017139	10	0.17139	0.66842
chr12	6883919	6905585	Nerve_Tibial	RPL13P5	ENSG00000240370.6		chr12	6896016	6896063	ACT	0.0860894	2	0.172179	0.670361
chr4	146176437	146182912	Brain_Cerebellum	LSM6	ENSG00000164167.10		chr4	146177028	146177049	GT	0.0061958	28	0.173482	0.672145
chr6	80129229	80167678	Heart_Left_Ventricle	BCKDHB	ENSG00000083123.14		chr6	80128873	80128908	GT	0.0578378	3	0.173513	0.672145
chr20	60762487	60767222	Testis	RP5-1016A21.1	ENSG00000276627.1		chr20	60762796	60762819	AATG	0.173462	1	0.173462	0.672145
chr7	151079922	151080437	Heart_Atrial_Appendage	FASTK	ENSG00000164896.19		chr7	151073253	151073287	ATTTT	0.0109204	16	0.174726	0.675704
chr7	95609862	95610544	Adipose_Subcutaneous	AC002451.3	ENSG00000231170.5		chr7	95616729	95616756	AAAC	0.175091	1	0.175091	0.675982
chr10	100275493	100280124	Spleen	BLOC1S2	ENSG00000196072.11		chr10	100267911	100267945	AGGTT	0.0352519	5	0.176259	0.679351
chr4	177451590	177593472	Testis	RP11-130F10.1	ENSG00000250131.1		chr4	177551808	177551855	GT	0.17671	1	0.17671	0.679786
chr3	183899474	183904195	Stomach	CYP2AB1P	ENSG00000233441.6		chr3	183894896	183894923	AAAC	0.177187	1	0.177187	0.679786
chr11	43680987	43750911	Brain_Putamen_basal_ganglia	RP11-472I20.3	ENSG00000283217.1		chr11	43673660	43673695	GTTT	0.177259	1	0.177259	0.679786
chr4	2469229	2490337	Cells_Cultured_fibroblasts	RNF4	ENSG00000063978.15		chr4	2466648	2466663	GT	0.17842	1	0.17842	0.683103
chr10	114995538	114996475	Testis	RP11-383C6.2	ENSG00000236799.1		chr10	114989627	114989674	AC	0.179337	1	0.179337	0.685078
chr12	129111139	129113065	Testis	RP11-669N7.2	ENSG00000249196.6		chr12	129114402	129114433	AAGGAGGG	0.179532	1	0.179532	0.685078
chr9	100442356	100498765	Artery_Tibial	MSANTD3	ENSG00000066697.14		chr9	100438428	100438445	GT	0.090452	2	0.180904	0.686898
chr9	100442356	100498765	Artery_Tibial	TMEFF1	ENSG00000241697.4		chr9	100438428	100438445	GT	0.090452	2	0.180904	0.686898
chr3	3174261	3179621	Artery_Tibial	CRBN	ENSG00000113851.14		chr3	3183952	3184003	AC	0.180497	1	0.180497	0.686898
chr9	111627448	111631040	Brain_Amygdala	LRRC37A5P	ENSG00000204173.10		chr9	111619132	111619157	GT	0.0917128	2	0.183426	0.690907
chr2	151468146	151468641	Nerve_Tibial	RIF1	ENSG00000080345.17		chr2	151462649	151462668	GT	0.0917306	2	0.183461	0.690907
chr8	144116494	144116604	Testis	WDR97	ENSG00000179698.13		chr8	144117600	144117629	GTTTT	0.182809	1	0.182809	0.690907
chr7	23106146	23117834	Artery_Tibial	KLHL7	ENSG00000122550.17		chr7	23104754	23104783	GGT	0.182932	1	0.182932	0.690907
chr6	56077573	56091497	Artery_Aorta	COL21A1	ENSG00000124749.16		chr6	56087062	56087111	AAAAC	0.183412	1	0.183412	0.690907
chr13	49549648	49551326	Pancreas	RCBTB1	ENSG00000136144.11		chr13	49544477	49544500	GTTT	0.0142518	13	0.185274	0.691965
chr17	28724893	28725304	Brain_Nucleus_accumbens_basal_ganglia	TLCD1	ENSG00000160606.10		chr17	28719026	28719053	ATTT	0.018487	10	0.18487	0.691965
chr7	780144	785517	Esophagus_Muscularis	DNAAF5	ENSG00000164818.15		chr7	775512	775539	GT	0.0310373	6	0.186224	0.691965
chr11	104905557	104906450	Stomach	RP11-693N9.2	ENSG00000235505.7		chr11	104908688	104908727	GT	0.0310717	6	0.18643	0.691965
chr11	126356302	126406096	Esophagus_Muscularis	ST3GAL4	ENSG00000110080.18		chr11	126359733	126359764	CCCTCCTT	0.0921374	2	0.184275	0.691965
chr17	76459366	76462387	Testis	AANAT	ENSG00000129673.9		chr17	76451780	76451803	AC	0.18556	1	0.18556	0.691965
chr4	56811794	56821608	Testis	SPINK2	ENSG00000128040.10		chr4	56803425	56803472	AC	0.186095	1	0.186095	0.691965
chr17	7834350	7844901	Lung	KDM6B	ENSG00000132510.10		chr17	7834631	7834650	CGGGG	0.186115	1	0.186115	0.691965
chr12	126033295	126042439	Testis	RP3-446N13.5	ENSG00000275212.1		chr12	126039841	126039870	GT	0.186449	1	0.186449	0.691965
chr17	27294435	27303367	Artery_Tibial	WSB1	ENSG00000109046.14		chr17	27302499	27302512	AT	0.00392625	48	0.18846	0.693416
chr16	66366758	66368643	Heart_Atrial_Appendage	CDH5	ENSG00000179776.17		chr16	66369981	66370012	GTTT	0.00891698	21	0.187257	0.693416
chr2	113197913	113199083	Adrenal_Gland	PSD4	ENSG00000125637.15		chr2	113195535	113195578	ATGG	0.0145379	13	0.188993	0.693416
chr19	40714635	40715707	Esophagus_Mucosa	COQ8B	ENSG00000123815.11		chr19	40715846	40715871	AC	0.0234772	8	0.187818	0.693416
chr1	43814933	43838219	Cells_Cultured_fibroblasts	ST3GAL3	ENSG00000126091.19		chr1	43815884	43815931	ATGG	0.0378341	5	0.18917	0.693416
chr17	70051410	70100658	Nerve_Tibial	KCNJ16	ENSG00000153822.13		chr17	70081807	70081834	GT	0.188305	1	0.188305	0.693416
chr17	70051410	70100658	Nerve_Tibial	LINC01028	ENSG00000267603.1		chr17	70081807	70081834	GT	0.188305	1	0.188305	0.693416
chr17	51631606	51633476	Testis	CA10	ENSG00000154975.13		chr17	51636776	51636811	AC	0.18925	1	0.18925	0.693416
chr20	44181570	44186327	Muscle_Skeletal	JPH2	ENSG00000149596.6		chr20	44193982	44194013	ATTC	0.0474985	4	0.189994	0.694082
chr5	61697639	61698267	Testis	RP11-2O17.2	ENSG00000248529.5		chr5	61697166	61697201	AAAC	0.190035	1	0.190035	0.694082
chr1	21835637	21838825	Adipose_Subcutaneous	HSPG2	ENSG00000142798.17		chr1	21832255	21832278	ATTC	0.0956997	2	0.191399	0.69575
chr2	39067753	39120336	Testis	SOS1	ENSG00000115904.12		chr2	39094653	39094680	ATTT	0.190877	1	0.190877	0.69575
chr18	76623196	76634882	Testis	LINC01927	ENSG00000266312.1		chr18	76628748	76628783	GT	0.191295	1	0.191295	0.69575
chr17	36511455	36513429	Cells_EBV-transformed_lymphocytes	MYO19	ENSG00000278259.4		chr17	36512197	36512236	GT	0.191765	1	0.191765	0.695981
chr9	32552479	32566391	Brain_Frontal_Cortex_BA9	TOPORS-AS1	ENSG00000235453.8		chr9	32547039	32547062	GTTT	0.19307	1	0.19307	0.69906
chr10	73913075	73913503	Testis	C10orf55	ENSG00000222047.8		chr10	73909890	73909907	GT	0.193221	1	0.193221	0.69906
chr7	140700959	140702866	Brain_Anterior_cingulate_cortex_BA24	NDUFB2	ENSG00000090266.12		chr7	140695230	140695253	AC	0.00976586	20	0.195317	0.702695
chr19	16863796	16864373	Lung	SIN3B	ENSG00000127511.9		chr19	16857518	16857553	GT	0.0975868	2	0.195174	0.702695
chr3	133662033	133688192	Brain_Cerebellum	TFP1	ENSG00000242337.5		chr3	133678852	133678891	GTTTT	0.194664	1	0.194664	0.702695
chr17	11263526	11379414	Adipose_Subcutaneous	SHISA6	ENSG00000188803.14		chr17	11330490	11330515	AG	0.19569	1	0.19569	0.702695
chr3	124633953	124650808	Thyroid	KALRN	ENSG00000160145.15		chr3	124649610	124649633	AAAC	0.195753	1	0.195753	0.702695
chr11	58622866	58624034	Brain_Spinal_cord_cervical_c-1	CNTF	ENSG00000242689.2		chr11	58617071	58617098	GT	0.0490629	4	0.196252	0.703388
chr17	45398047	45402714	Skin_Not_Sun_Exposed_Suprapubic	ARHGAP27	ENSG00000159314.11		chr17	45399592	45399621	CTTTT	0.0123806	16	0.198089	0.704699
chr8	144932590	144945913	Muscle_Skeletal	ZNF16	ENSG00000170631.14		chr8	144936717	144936744	AAAT	0.0990743	2	0.198149	0.704699
chr14	92456608	92482680	Whole_Blood	SLC24A4	ENSG00000140090.17		chr14	92468893	92468934	GT	0.197299	1	0.197299	0.704699
chr11	72597619	72598509	Adipose_Subcutaneous	PDE2A	ENSG00000186642.15		chr11	72593181	72593200	GT	0.197641	1	0.197641	0.704699
chr11	637589	639433	Pituitary	DRD4	ENSG00000069696.6		chr11	637987	638004	AC	0.197896	1	0.197896	0.704699
chr19	58259691	58266868	Cells_Cultured_fibroblasts	CTD-3138B18.5	ENSG00000268516.2		chr19	58265283	58265314	ATTT	0.0124511	16	0.199217	0.706076
chr5	113385212	113488245	Prostate	MCC	ENSG00000171444.17		chr5	113459826	113459857	GT	0.19893	1	0.19893	0.706076
chr1	53349253	53350176	Testis	RP11-117D22.1	ENSG00000226938.1		chr1	53348127	53348180	GT	0.199457	1	0.199457	0.706076
chr18	12749533	12775669	Testis	LINC01882	ENSG00000267654.1		chr18	12764820	12764835	AAAC	0.200137	1	0.200137	0.707395
chr8	96231132	96231774	Artery_Aorta	UQCRB	ENSG00000156467.9		chr8	96222795	96222836	GT	0.00956992	21	0.200968	0.708201
chr2	230865145	230873417	Heart_Atrial_Appendage	ITM2C	ENSG00000135916.15		chr2	230868464	230868483	AC	0.00957048	21	0.20098	0.708201
chr7	77286926	77287440	Lung	CCDC146	ENSG00000135205.14		chr7	77295948	77295963	GT	0.0183192	11	0.201511	0.708986
chr5	43068217	43116447	Lung	ZNF131	ENSG00000172262.11		chr5	43064616	43064636	GTT	0.0506025	4	0.20241	0.710087
chr2	233854952	233868327	Testis	MSL3P1	ENSG00000224287.2		chr2	233859735	233859768	GT	0.202582	1	0.202582	0.710087
chr17	43131270	43138657	Stomach	NBR1	ENSG00000188554.13		chr17	43131381	43131398	AAT	0.202858	1	0.202858	0.710087
chr19	11296426	11321224	Whole_Blood	CTC-510F12.4	ENSG00000267174.5		chr19	11297483	11297512	ATTTT	0.203058	1	0.203058	0.710087
chr5	132866691	132866869	Heart_Atrial_Appendage	UQCRQ	ENSG00000164405.10		chr5	132857971	132857990	GT	0.00510702	40	0.204281	0.71112
chr2	201195948	201200443	Spleen	CASP10	ENSG00000003400.14		chr2	201194088	201194121	GT	0.203783	1	0.203783	0.71112
chr2	233264065	233270002	Skin_Not_Sun_Exposed_Suprapubic	ATG16L1	ENSG00000085978.21		chr2	233266199	233266228	AGGCGG	0.204125	1	0.204125	0.71112
chr5	156922216	156924436	Testis	TIMD4	ENSG00000145850.8		chr5	156933007	156933031	CTTTT	0.20637	1	0.20637	0.717306
chr12	6492972	6493717	Adipose_Subcutaneous	MRPL51	ENSG00000111639.7		chr12	6485520	6485559	ATTT	0.0188126	11	0.206939	0.7182
chr12	108592397	108597970	Colon_Sigmoid	TMEM119	ENSG00000183160.8		chr12	108585255	108585284	AAC	0.00601363	35	0.210477	0.722019
chr9	113273410	113275382	Breast_Mammary_Tissue	CDC26	ENSG00000176386.8		chr9	113279336	113279375	GTTTT	0.00676027	31	0.209568	0.722019
chr17	42668303	42669430	Esophagus_Gastroesophageal_Junction	PLEKHH3	ENSG00000068137.14		chr17	42668819	42668845	AAC	0.00971206	22	0.213665	0.722019
chr3	126033678	126050898	Breast_Mammary_Tissue	SLC41A3	ENSG00000114544.16		chr3	126046357	126046380	GT	0.0122887	17	0.208908	0.722019
chr1	61990364	61991482	Prostate	PATJ	ENSG00000132849.19		chr1	61991183	61991218	ATG	0.0142109	15	0.213164	0.722019
chr16	28152785	28156074	Lung	XPO6	ENSG00000169180.11		chr16	28152075	28152088	AC	0.0264457	8	0.211566	0.722019
chr2	85554628	85555484	Lung	GGCX	ENSG00000115486.11		chr2	85554455	85554484	AAC	0.0266948	8	0.213559	0.722019
chr12	132201261	132201581	Brain_Cerebellum	GALNT9	ENSG00000182870.12		chr12	132198428	132198445	AGCCCC	0.105781	2	0.211562	0.722019
chr15	76733384	76753808	Esophagus_Muscularis	SCAPER	ENSG00000140386.12		chr15	76757456	76757479	GT	0.105992	2	0.211985	0.722019
chr19	16357025	16361886	Spleen	EPS15L1	ENSG00000127527.13		chr19	16369677	16369708	AC	0.106816	2	0.213631	0.722019
chr19	5915065	5915221	Nerve_Tibial	CAPS	ENSG00000105519.15		chr19	5910676	5910711	AAC	0.209033	1	0.209033	0.722019
chr2	197187106	197310578	Testis	ANKRD44	ENSG00000065413.18		chr2	197308153	197308172	GT	0.211517	1	0.211517	0.722019
chr2	197187106	197310578	Testis	ANKRD44-IT1	ENSG00000236977.1		chr2	197308153	197308172	GT	0.211517	1	0.211517	0.722019
chr12	8664115	8668633	Testis	RP11-20D14.3	ENSG00000255829.1		chr12	8671911	8671935	AAAAC	0.211697	1	0.211697	0.722019
chr15	93906289	93946698	Testis	LINC01580	ENSG00000258785.5		chr15	93945760	93945795	AAC	0.211799	1	0.211799	0.722019
chr1	161054705	161059614	Whole_Blood	ARHGAP30	ENSG00000186517.13		chr1	161067571	161067594	CTTT	0.21293	1	0.21293	0.722019
chr9	93110721	93112218	Esophagus_Muscularis	CARD19	ENSG00000165233.17		chr9	93113512	93113555	AC	0.213535	1	0.213535	0.722019
chr1	153259733	153260927	Skin_Not_Sun_Exposed_Suprapubic	LOR	ENSG00000203782.5		chr1	153270833	153270872	GTTTT	0.213688	1	0.213688	0.722019
chr14	25127281	25145402	Testis	RP11-89K22.1	ENSG00000258098.1		chr14	25151946	25151971	AC	0.214173	1	0.214173	0.722598
chr17	81670453	81671744	Whole_Blood	CCDC137	ENSG00000185298.12		chr17	81676449	81676462	CT	0.0238599	9	0.214739	0.723333
chr8	17715901	17716473	Brain_Cerebellum	MTUS1	ENSG00000129422.14		chr8	17716547	17716570	AAAC	0.21502	1	0.21502	0.723333
chr16	58227846	58230855	Testis	RP11-459F6.1	ENSG00000260867.1		chr16	58221565	58221590	GT	0.215715	1	0.215715	0.724612
chr6	111574802	111576362	Cells_Cultured_fibroblasts	TRAF3IP2-AS1	ENSG00000231889.7		chr6	111568433	111568490	NA	0.108206	2	0.216412	0.72524
chr5	35709121	35727675	Pituitary	SPEF2	ENSG00000152582.13		chr5	35736469	35736498	GT	0.216755	1	0.216755	0.72524
chr3	97638082	97648286	Testis	EPHA6	ENSG00000080224.17		chr3	97649765	97649792	AC	0.216847	1	0.216847	0.72524
chr12	100540818	100561885	Liver	NR1H4	ENSG00000012504.13		chr12	100554393	100554424	AC	0.109737	2	0.219474	0.732961
chr7	99672679	99674533	Breast_Mammary_Tissue	CYP3A5	ENSG00000106258.13		chr7	99671118	99671163	AC	0.0147029	15	0.220544	0.73425
chr10	13496888	13499739	Colon_Sigmoid	BEND7	ENSG00000165626.16		chr10	13503713	13503736	GTTT	0.0370805	6	0.222483	0.73425
chr2	71110122	71124206	Skin_Sun_Exposed_Lower_leg	MCEE	ENSG00000124370.10		chr2	71106072	71106101	GT	0.11057	2	0.22114	0.73425
chr2	142986021	143033236	Testis	KYNU	ENSG00000115919.14		chr2	143028849	143028878	AAAAC	0.221638	1	0.221638	0.73425
chr10	68195532	68197352	Heart_Atrial_Appendage	MYPN	ENSG00000138347.15		chr10	68193798	68193839	AC	0.221686	1	0.221686	0.73425
chr9	99951285	99959917	Skin_Sun_Exposed_Lower_leg	STX17	ENSG00000136874.10		chr9	99949943	99949966	AC	0.222176	1	0.222176	0.73425
chr9	136016429	136049636	Testis	NACC2	ENSG00000148411.7		chr9	136031325	136031352	AATG	0.222208	1	0.222208	0.73425
chr10	2446950	2447287	Testis	RP11-446F3.2	ENSG00000234170.5		chr10	2444326	2444377	GT	0.222287	1	0.222287	0.73425
chr1	73348203	73355073	Testis	LINC01360	ENSG00000233973.6		chr1	73349190	73349209	AC	0.222732	1	0.222732	0.73425
chr9	128185776	128190329	Skin_Sun_Exposed_Lower_leg	CIZ1	ENSG00000148337.20		chr9	128183749	128183784	AAAC	0.0563566	4	0.225427	0.741009
chr22	36811692	36813646	Brain_Cerebellum	PVALB	ENSG00000100362.12		chr22	36811276	36811307	ATTT	0.225322	1	0.225322	0.741009
chr17	6164302	6166915	Testis	RP11-960B9.2	ENSG00000262231.1		chr17	6172485	6172502	CT	0.227076	1	0.227076	0.745368
chr1	150294449	150308048	Whole_Blood	MRPS21	ENSG00000266472.5		chr1	150312296	150312325	GT	0.0568947	4	0.227579	0.745952
chr14	39159550	39170015	Esophagus_Muscularis	TRAPPC6B	ENSG00000182400.14		chr14	39172285	39172302	GT	0.0580338	4	0.232135	0.751591
chr3	132352823	132356686	Skin_Not_Sun_Exposed_Suprapubic	ACPP	ENSG00000014257.15		chr3	132363086	132363113	AAAT	0.0775152	3	0.232546	0.751591
chr4	184372480	184373424	Liver	RP11-290F5.1	ENSG00000249096.6		chr4	184376871	184376906	AC	0.115367	2	0.230733	0.751591
chr15	42004978	42005990	Skin_Not_Sun_Exposed_Suprapubic	PLA2G4E	ENSG00000188089.13		chr15	41999050	41999079	AAAAT	0.115841	2	0.231683	0.751591
chr22	50556405	50562858	Testis	SYCE3	ENSG00000217442.3		chr22	50553203	50553222	ATTT	0.230166	1	0.230166	0.751591
chr14	103122116	103122609	Testis	LINC00677	ENSG00000259717.1		chr14	103112866	103112889	GT	0.230719	1	0.230719	0.751591
chr11	9758503	9780376	Brain_Nucleus_accumbens_basal_ganglia	SBF2-AS1	ENSG00000246273.6		chr11	9770773	9770811	GTT	0.231139	1	0.231139	0.751591
chr19	52160591	52168058	Heart_Atrial_Appendage	ZNF836	ENSG00000196267.12		chr19	52164450	52164477	CCTT	0.231676	1	0.231676	0.751591
chr10	89727896	89729128	Cells_Cultured_fibroblasts	KIF20B	ENSG00000138182.14		chr10	89728906	89728947	GT	0.232334	1	0.232334	0.751591
chr1	217635919	217648882	Testis	SPATA17	ENSG00000162814.10		chr1	217656547	217656578	ATGT	0.232565	1	0.232565	0.751591
chr9	133354957	133356400	Artery_Coronary	SURF1	ENSG00000148290.9		chr9	133356367	133356387	CGGGGTG	0.0062449	38	0.237306	0.755425
chr20	3669000	3669299	Nerve_Tibial	ADAM33	ENSG00000149451.17		chr20	3664474	3664501	GTTT	0.0235508	10	0.235508	0.755425
chr17	50081408	50087744	Artery_Tibial	ITGA3	ENSG00000005884.17		chr17	50080464	50080505	GT	0.0588782	4	0.235513	0.755425
chr1	43120272	43150761	Skin_Sun_Exposed_Lower_leg	FAM183A	ENSG00000186973.10		chr1	43142265	43142312	AC	0.0790712	3	0.237213	0.755425
chr1	223623995	223625805	Minor_Salivary_Gland	CAPN8	ENSG00000203697.11		chr1	223629198	223629231	AC	0.0791193	3	0.237358	0.755425
chr7	37429756	37448675	Lung	ELMO1	ENSG00000155849.15		chr7	37439981	37440000	AC	0.117121	2	0.234241	0.755425
chr16	50026467	50033397	Esophagus_Mucosa	CNEP1R1	ENSG00000205423.11		chr16	50023112	50023143	GTTT	0.234649	1	0.234649	0.755425
chr4	153466521	153467211	Muscle_Skeletal	KIAA0922	ENSG00000121210.15		chr4	153469930	153469953	AAAC	0.235254	1	0.235254	0.755425
chr8	6841967	6844762	Testis	GS1-24F4.2	ENSG00000245857.2		chr8	6850742	6850757	AC	0.235751	1	0.235751	0.755425
chr6	31587733	31588518	Whole_Blood	LST1	ENSG00000204482.10		chr6	31588225	31588242	AG	0.23627	1	0.23627	0.755425
chr20	37200494	37203885	Esophagus_Muscularis	RPN2	ENSG00000118705.16		chr20	37194256	37194279	GTT	0.237363	1	0.237363	0.755425
chr8	22565872	22566661	Artery_Aorta	SORBS3	ENSG00000120896.13		chr8	22575903	22575932	GT	0.237902	1	0.237902	0.75605
chr14	54776540	54784537	Muscle_Skeletal	SAMD4A	ENSG00000020577.13		chr14	54776856	54776881	GT	0.238216	1	0.238216	0.75605
chr8	98231855	98236155	Vagina	NIPAL2	ENSG00000104361.9		chr8	98233341	98233366	AC	0.0342385	7	0.23967	0.757749
chr4	44017062	44019751	Testis	LVCAT1	ENSG00000251350.1		chr4	44022903	44022926	CCT	0.239399	1	0.239399	0.757749
chr3	136959552	136982063	Testis	IL20RB-AS1	ENSG00000249407.1		chr3	136970612	136970663	CCTT	0.240055	1	0.240055	0.757749
chr14	34758846	34764707	Testis	BAZ1A	ENSG00000198604.10		chr14	34755732	34755743	AT	0.240069	1	0.240069	0.757749
chr6	29725563	29726011	Whole_Blood	HLA-F	ENSG00000204642.13		chr6	29726560	29726583	GT	0.080197	3	0.240591	0.758356
chr8	1909470	1922964	Thyroid	ARHGEF10	ENSG00000104728.15		chr8	1918461	1918504	GT	0.0806271	3	0.241881	0.759149
chr1	234373840	234374230	Muscle_Skeletal	COA6	ENSG00000168275.14		chr1	234383574	234383597	AC	0.08072	3	0.24216	0.759149
chr3	113580709	113583409	Brain_Cerebellar_Hemisphere	SIDT1	ENSG00000072858.10		chr3	113571487	113571510	AC	0.120686	2	0.241371	0.759149
chr7	143876622	143881923	Cells_Cultured_fibroblasts	TCAF1	ENSG00000198420.9		chr7	143882194	143882219	GT	0.242162	1	0.242162	0.759149
chr2	219362808	219368351	Prostate	DNPEP	ENSG00000123992.18		chr2	219357485	219357500	GTTT	0.0608507	4	0.243403	0.76016
chr2	25421223	25427467	Cells_EBV-transformed_lymphocytes	AC104699.1	ENSG00000224220.1		chr2	25420468	25420523	AGAT	0.242826	1	0.242826	0.76016
chr4	23003243	23055839	Testis	RP11-412P11.1	ENSG00000248837.5		chr4	23061222	23061251	AC	0.243476	1	0.243476	0.76016
chr15	63156521	63157400	Breast_Mammary_Tissue	RPS27L	ENSG00000185088.13		chr15	63160255	63160294	ATTT	0.244219	1	0.244219	0.761446
chr21	38272557	38296926	Spleen	KCNJ15	ENSG00000157551.17		chr21	38277028	38277047	GT	0.245769	1	0.245769	0.765243
chr9	33472412	33473789	Nerve_Tibial	NOL6	ENSG00000165271.16		chr9	33483458	33483487	GTTTT	0.12313	2	0.246259	0.765732
chr7	151351482	151352812	Brain_Cerebellum	NUB1	ENSG00000013374.15		chr7	151351917	151351936	AC	0.0212505	12	0.255005	0.766015
chr2	28633039	28642858	Skin_Not_Sun_Exposed_Suprapubic	PLB1	ENSG00000163803.12		chr2	28646433	28646454	AC	0.0362336	7	0.253636	0.766015
chr7	150804472	150804827	Esophagus_Gastroesophageal_Junction	TMEM176A	ENSG00000002933.7		chr7	150802077	150802101	CTCTT	0.0416085	6	0.249651	0.766015
chr6	32255414	32390214	Ovary	XXbac-BPG154L12.4	ENSG00000225914.1		chr6	32367053	32367078	AC	0.0623771	4	0.249508	0.766015
chr6	32255414	32390214	Ovary	XXbac-BPG154L12.5	ENSG00000277427.1		chr6	32367053	32367078	AC	0.0623771	4	0.249508	0.766015
chr8	97029494	97066009	Thyroid	CPQ	ENSG00000104324.15		chr8	97056102	97056131	AC	0.063042	4	0.252168	0.766015
chr16	83125501	83217345	Adipose_Subcutaneous	CDH13	ENSG00000140945.16		chr16	83197272	83197289	AT	0.0841883	3	0.252565	0.766015
chr4	102418988	102431062	Artery_Tibial	RP11-499E18.1	ENSG00000248161.5		chr4	102413772	102413799	GT	0.124998	2	0.249997	0.766015
chr1	202811370	202811689	Testis	PCAT6	ENSG00000228288.6		chr1	202819075	202819100	GT	0.126626	2	0.253251	0.766015
chr1	77521943	77535847	Cells_Cultured_fibroblasts	AK5	ENSG00000154027.18		chr1	77531990	77532005	CCGG	0.127404	2	0.254807	0.766015
chr2	1552857	1554170	Thyroid	AC141930.3	ENSG00000283766.1		chr2	1545026	1545049	ATCT	0.246913	1	0.246913	0.766015
chr9	69817805	69820553	Testis	C9orf135-AS1	ENSG00000225626.2		chr9	69820433	69820472	GT	0.247022	1	0.247022	0.766015
chr17	61480319	61481325	Lung	TBX4	ENSG00000121075.9		chr17	61483614	61483653	GT	0.248683	1	0.248683	0.766015
chr6	46248896	46456752	Esophagus_Muscularis	RCAN2	ENSG00000172348.14		chr6	46354898	46354945	AC	0.249961	1	0.249961	0.766015
chr3	71198392	71289543	Testis	FOXP1	ENSG00000114861.18		chr3	71267125	71267156	AC	0.250823	1	0.250823	0.766015
chr3	71198392	71289543	Testis	RP11-298C2.1	ENSG00000277539.1		chr3	71267125	71267156	AC	0.250823	1	0.250823	0.766015
chr7	5712863	5713305	Testis	RNF216	ENSG00000011275.18		chr7	5705918	5705967	GTTTT	0.250911	1	0.250911	0.766015
chr3	28514122	28520992	Testis	ZCWPW2	ENSG00000206559.7		chr3	28515716	28515745	GT	0.252226	1	0.252226	0.766015
chr6	36598983	36601152	Stomach	SRSF3	ENSG00000112081.16		chr6	36591070	36591093	AAC	0.252923	1	0.252923	0.766015
chr12	53720011	53721467	Adipose_Subcutaneous	CALCOCO1	ENSG00000012822.15		chr12	53730421	53730447	GTT	0.253213	1	0.253213	0.766015
chr10	78945989	78952310	Testis	ZMIZ1-AS1	ENSG00000224596.7		chr10	78941950	78941976	AAC	0.253698	1	0.253698	0.766015
chr8	41596878	41598292	Muscle_Skeletal	GPAT4	ENSG00000158669.11		chr8	41603897	41603924	AATG	0.253789	1	0.253789	0.766015
chr13	90066810	90079127	Testis	LINC00559	ENSG00000261446.2		chr13	90066081	90066106	AC	0.253922	1	0.253922	0.766015
chr22	20870533	20881049	Lung	SNAP29	ENSG00000099940.11		chr22	20884767	20884791	GTTTT	0.254252	1	0.254252	0.766015
chr4	155347905	155352596	Testis	MAP9	ENSG00000164114.18		chr4	155359211	155359246	AC	0.254265	1	0.254265	0.766015
chr21	36137932	36141924	Esophagus_Mucosa	CBR3	ENSG00000159231.5		chr21	36138104	36138133	AGTTT	0.254441	1	0.254441	0.766015
chr17	5109868	5111076	Thyroid	ZNF232	ENSG00000167840.13		chr17	5115556	5115575	GT	0.051144	5	0.25572	0.766161
chr14	67662535	67674375	Muscle_Skeletal	VTI1B	ENSG00000100568.10		chr14	67657599	67657622	GT	0.255408	1	0.255408	0.766161
chr2	130358975	130369133	Esophagus_Muscularis	PTPN18	ENSG00000072135.12		chr2	130353872	130353903	AC	0.0426885	6	0.256131	0.766394
chr1	58481174	58527261	Brain_Spinal_cord_cervical_c-1	OMA1	ENSG00000162600.11		chr1	58475478	58475505	GT	0.00700717	37	0.259265	0.766638
chr7	30753938	30778432	Lung	MINDY4	ENSG00000106125.14		chr7	30766196	30766233	AC	0.0236024	11	0.259627	0.766638
chr7	30753938	30778432	Lung	INMT	ENSG00000241644.2		chr7	30766196	30766233	AC	0.0236024	11	0.259627	0.766638
chr10	133554328	133555351	Brain_Frontal_Cortex_BA9	SYCE1	ENSG00000171772.15		chr10	133562262	133562315	AC	0.0516545	5	0.258273	0.766638
chr11	73919032	73919298	Skin_Sun_Exposed_Lower_leg	PAAF1	ENSG00000175575.12		chr11	73924005	73924028	AC	0.064846	4	0.259384	0.766638
chr15	89075384	89079434	Artery_Tibial	RP11-326A19.4	ENSG00000260123.1		chr15	89068197	89068222	AC	0.128809	2	0.257617	0.766638
chr14	80906081	80914322	Testis	CEP128	ENSG00000100629.16		chr14	80909372	80909403	GT	0.256823	1	0.256823	0.766638
chr9	105705753	105706847	Muscle_Skeletal	TMEM38B	ENSG00000095209.11		chr9	105716375	105716390	GT	0.25893	1	0.25893	0.766638
chr5	6583801	6585774	Adipose_Visceral_Omentum	LINC01018	ENSG00000250056.5		chr5	6585186	6585201	AC	0.258964	1	0.258964	0.766638
chr11	8140193	8168866	Skin_Sun_Exposed_Lower_leg	LMO1	ENSG00000166407.13		chr11	8131108	8131143	AGTG	0.259721	1	0.259721	0.766638
chr2	113705548	113717753	Cells_Cultured_fibroblasts	SLC35F5	ENSG00000115084.13		chr2	113699927	113699954	GTTT	0.259877	1	0.259877	0.766638
chr3	119676966	119677204	Artery_Aorta	COX17	ENSG00000138495.6		chr3	119670753	119670786	AC	0.0144888	18	0.260798	0.767664
chr15	42495713	42511833	Testis	SNAP23	ENSG00000092531.9		chr15	42491902	42491921	AGTT	0.260911	1	0.260911	0.767664
chr8	132747057	132751785	Whole_Blood	TMEM71	ENSG00000165071.14		chr8	132738859	132738880	GT	0.261226	1	0.261226	0.767664
chr5	170019108	170027863	Lung	DOCK2	ENSG00000134516.15		chr5	170028741	170028768	AC	0.131216	2	0.262432	0.768863
chr20	34550029	34559208	Brain_Cerebellum	MAP1LC3A	ENSG00000101460.12		chr20	34567803	34567828	AG	0.262584	1	0.262584	0.768863
chr10	73250991	73251763	Brain_Hypothalamus	MRPS16	ENSG00000182180.13		chr10	73255628	73255643	AAAC	0.262669	1	0.262669	0.768863
chr13	95497125	95528492	Pancreas	CLDN10-AS1	ENSG00000223392.1		chr13	95516969	95517024	CCTT	0.262971	1	0.262971	0.768863
chr2	127643072	127649488	Adipose_Subcutaneous	LIMS2	ENSG00000072163.19		chr2	127638463	127638474	GTTT	0.0439193	6	0.263516	0.76948
chr1	36423466	36431802	Colon_Transverse	OSCP1	ENSG00000116885.18		chr1	36423024	36423041	ATT	0.0072604	37	0.268635	0.773671
chr2	85577649	85581576	Lung	VAMP8	ENSG00000118640.10		chr2	85586581	85586600	AAAC	0.014981	18	0.269658	0.773671
chr18	690745	691068	Esophagus_Gastroesophageal_Junction	ENOSF1	ENSG00000132199.18		chr18	699479	699505	ATT	0.0151393	18	0.272508	0.773671
chr5	82312851	82317998	Brain_Putamen_basal_ganglia	ATP6AP1L	ENSG00000205464.11		chr5	82314022	82314051	GT	0.0194018	14	0.271626	0.773671
chr7	151216029	151218081	Esophagus_Mucosa	ABCF2	ENSG00000033050.7		chr7	151206720	151206751	ATCT	0.0277244	10	0.277244	0.773671
chr15	100575128	100580263	Lung	LINS1	ENSG00000140471.16		chr15	100573117	100573134	AG	0.0332756	8	0.266204	0.773671
chr6	71296817	71301386	Esophagus_Mucosa	OGFRL1	ENSG00000119900.7		chr6	71287931	71287990	CTGTT	0.039477	7	0.276339	0.773671
chr11	62357144	62389133	Breast_Mammary_Tissue	ASRGL1	ENSG00000162174.12		chr11	62357225	62357264	GTTTT	0.0536663	5	0.268332	0.773671
chr2	69788141	69804533	Adipose_Subcutaneous	ANXA4	ENSG00000196975.15		chr2	69785552	69785578	ATG	0.0550396	5	0.275198	0.773671
chr12	9998380	9999037	Testis	CLEC1B	ENSG00000165682.14		chr12	9998645	9998674	AAAAC	0.0897278	3	0.269183	0.773671
chr10	12108015	12117673	Thyroid	DHTKD1	ENSG00000181192.11		chr10	12112501	12112530	AC	0.133675	2	0.26735	0.773671
chr6	116752695	116761977	Colon_Transverse	FAM162B	ENSG00000183807.7		chr6	116771068	116771102	AAAAC	0.135167	2	0.270335	0.773671
chr10	110783427	110784341	Muscle_Skeletal	RBM20	ENSG00000203867.7		chr10	110792142	110792189	ATCT	0.135968	2	0.271936	0.773671
chr2	110996004	111016512	Testis	ACOXL	ENSG00000153093.18		chr2	110988858	110988893	GT	0.136145	2	0.272289	0.773671
chr6	42173814	42178280	Testis	GUCA1A	ENSG00000048545.13		chr6	42187103	42187117	AAAAT	0.265491	1	0.265491	0.773671
chr10	119726359	119751076	Testis	INPP5F	ENSG00000198825.12		chr10	119738649	119738676	AC	0.265795	1	0.265795	0.773671
chr12	116988869	117004436	Cells_Cultured_fibroblasts	FBXW8	ENSG00000174989.12		chr12	116992762	116992797	GT	0.268769	1	0.268769	0.773671
chr18	47077461	47099243	Testis	KATNAL2	ENSG00000167216.16		chr18	47087753	47087782	GT	0.269001	1	0.269001	0.773671
chr6	9897003	9900326	Testis	OFCC1	ENSG00000181355.20		chr6	9890356	9890395	AC	0.269353	1	0.269353	0.773671
chr20	18588115	18593731	Breast_Mammary_Tissue	DTD1	ENSG00000125821.11		chr20	18597155	18597200	GT	0.269778	1	0.269778	0.773671
chr20	18588115	18593731	Breast_Mammary_Tissue	LINC00493	ENSG00000232388.4		chr20	18597155	18597200	GT	0.269778	1	0.269778	0.773671
chr1	173907514	173909552	Liver	SERPINC1	ENSG00000117601.13		chr1	173909166	173909186	ATT	0.27023	1	0.27023	0.773671
chr12	118212995	118214017	Testis	TAOK3	ENSG00000135090.13		chr12	118207859	118207890	GT	0.271114	1	0.271114	0.773671
chr3	196324866	196326777	Testis	TM4SF19-AS1	ENSG00000235897.1		chr3	196326390	196326415	AC	0.272345	1	0.272345	0.773671
chr1	202305749	202306417	Testis	LGR6	ENSG00000133067.17		chr1	202295871	202295914	GT	0.273565	1	0.273565	0.773671
chr19	2555188	2646224	Brain_Cerebellar_Hemisphere	GNG7	ENSG00000176533.12		chr19	2621697	2621720	GTTT	0.273629	1	0.273629	0.773671
chr1	56645481	56674381	Artery_Aorta	PRKAA2	ENSG00000162409.10		chr1	56664856	56664891	AC	0.273951	1	0.273951	0.773671
chr21	42022211	42024306	Testis	ZNF295-AS1	ENSG00000237232.7		chr21	42024967	42025008	GT	0.274039	1	0.274039	0.773671
chr1	15121059	15124228	Brain_Cerebellum	TMEM51-AS1	ENSG00000175147.11		chr1	15112330	15112373	AC	0.274515	1	0.274515	0.773671
chr1	247000074	247007906	Cells_Cultured_fibroblasts	ZNF695	ENSG00000197472.14		chr1	247008344	247008375	GT	0.274814	1	0.274814	0.773671
chr1	247000074	247007906	Cells_Cultured_fibroblasts	ZNF670	ENSG00000277462.1		chr1	247008344	247008375	GT	0.274814	1	0.274814	0.773671
chr9	34580201	34582335	Testis	CNTFR-AS1	ENSG00000237159.5		chr9	34571562	34571589	AC	0.276559	1	0.276559	0.773671
chr3	60822011	61042047	Cells_EBV-transformed_lymphocytes	FHIT	ENSG00000189283.9		chr3	60983136	60983163	AC	0.276926	1	0.276926	0.773671
chr12	103857243	103861118	Testis	TTC41P	ENSG00000214198.8		chr12	103856382	103856416	AAAAC	0.277132	1	0.277132	0.773671
chr18	76816171	76816755	Stomach	RP11-162A12.2	ENSG00000264278.1		chr18	76816034	76816061	ATTT	0.277345	1	0.277345	0.773671
chr6	3089657	3090658	Muscle_Skeletal	RIPK1	ENSG00000137275.13		chr6	3098178	3098197	AAAT	0.277411	1	0.277411	0.773671
chr11	116639537	116645844	Testis	AP000770.1	ENSG00000237937.5		chr11	116639133	116639156	AG	0.277587	1	0.277587	0.773671
chr10	101017783	101018099	Brain_Cerebellum	PDZD7	ENSG00000186862.17		chr10	101015465	101015492	AC	0.277728	1	0.277728	0.773671
chr4	155718883	155722038	Artery_Aorta	GUCY1A3	ENSG00000164116.16		chr4	155720338	155720377	ATCT	0.0173831	16	0.278129	0.773671
chr21	32582415	32585421	Testis	TCP10L	ENSG00000242220.6		chr21	32580477	32580516	AC	0.1392	2	0.278401	0.773671
chr19	47695080	47695365	Prostate	GLTSCR1	ENSG00000063169.10		chr19	47690793	47690814	GT	0.0701667	4	0.280667	0.775288
chr10	70124097	70132947	Brain_Cortex	AIFM2	ENSG00000042286.14		chr10	70132770	70132787	AGCGGG	0.13973	2	0.279461	0.775288
chr15	78257741	78263872	Testis	RP11-762H8.3	ENSG00000259708.1		chr15	78258042	78258059	GT	0.279783	1	0.279783	0.775288
chr17	7883335	7885443	Testis	NAA38	ENSG00000183011.13		chr17	7884072	7884095	GT	0.280046	1	0.280046	0.775288
chr7	149771074	149776236	Lung	ZNF467	ENSG00000181444.12		chr7	149781608	149781633	AC	0.280581	1	0.280581	0.775288
chr2	27099840	27102097	Brain_Putamen_basal_ganglia	CGREF1	ENSG00000138028.15		chr2	27107256	27107270	AAAAC	0.0256403	11	0.282043	0.775468
chr13	105707629	105718475	Testis	LINC00343	ENSG00000226620.7		chr13	105720964	105720985	GT	0.281269	1	0.281269	0.775468
chr6	75265338	75284402	Cells_Cultured_fibroblasts	TMEM30A	ENSG00000112697.15		chr6	75283308	75283335	AC	0.281558	1	0.281558	0.775468
chr1	153741368	153746957	Artery_Tibial	INTS3	ENSG00000143624.13		chr1	153753043	153753070	AC	0.28208	1	0.28208	0.775468
chr1	12202171	12202507	Whole_Blood	TNFRSF1B	ENSG00000028137.18		chr1	12204791	12204814	ACC	0.282639	1	0.282639	0.776078
chr3	98586218	98588713	Esophagus_Muscularis	CPOX	ENSG00000080819.6		chr3	98596091	98596118	GT	0.0258475	11	0.284322	0.778841
chr3	149009402	149026760	Muscle_Skeletal	GYG1	ENSG00000163754.17		chr3	149012998	149013031	GT	0.284183	1	0.284183	0.778841
chr11	126342322	126355442	Lung	ST3GAL4-AS1	ENSG00000280832.1		chr11	126333866	126333891	CT	0.142423	2	0.284845	0.779345
chr20	5604440	5609640	Adipose_Subcutaneous	GPCPD1	ENSG00000125772.12		chr20	5604775	5604806	GT	0.2853	1	0.2853	0.779662
chr2	85134450	85166920	Thyroid	TCF7L1	ENSG00000152284.4		chr2	85168193	85168222	AC	0.0286059	10	0.286059	0.780808
chr5	58617870	58726002	Testis	RAB3C	ENSG00000152932.7		chr5	58673448	58673487	AC	0.286871	1	0.286871	0.782097
chr3	49360382	49360928	Vagina	RHOA	ENSG00000067560.10		chr3	49358241	49358258	CGG	0.0481292	6	0.288775	0.782652
chr19	8526935	8527328	Spleen	MYO1F	ENSG00000142347.16		chr19	8526350	8526365	AG	0.144041	2	0.288082	0.782652
chr11	125190068	125190985	Testis	PKNOX2	ENSG00000165495.15		chr11	125195884	125195923	AC	0.288738	1	0.288738	0.782652
chr11	125190068	125190985	Testis	KRT18P59	ENSG00000187686.4		chr11	125195884	125195923	AC	0.288738	1	0.288738	0.782652
chr11	125190068	125190985	Testis	RP11-687M24.7	ENSG00000259290.1		chr11	125195884	125195923	AC	0.288738	1	0.288738	0.782652
chr20	62202843	62203084	Brain_Hippocampus	MTG2	ENSG00000101181.17		chr20	62202439	62202458	AAAC	0.00596816	49	0.29244	0.782741
chr1	155192310	155192786	Nerve_Tibial	MUC1	ENSG00000185499.16		chr1	155186469	155186492	AC	0.00912549	32	0.292016	0.782741
chr15	68197628	68205121	Adipose_Subcutaneous	CLN6	ENSG00000128973.12		chr15	68207980	68207999	GT	0.0127433	23	0.293095	0.782741
chr5	180610025	180611331	Breast_Mammary_Tissue	FLT4	ENSG00000037280.15		chr5	180620740	180620757	AC	0.0325554	9	0.292999	0.782741
chr19	14492912	14496037	Esophagus_Mucosa	GIPC1	ENSG00000123159.15		chr19	14505959	14505984	GT	0.0979181	3	0.293754	0.782741
chr3	58569865	58586858	Adipose_Subcutaneous	FAM107A	ENSG00000168309.16		chr3	58595701	58595718	GT	0.14615	2	0.2923	0.782741
chr17	78169229	78170817	Muscle_Skeletal	SYNGR2	ENSG00000108639.7		chr17	78167385	78167412	GTTT	0.14698	2	0.29396	0.782741
chr7	91118208	91207165	Artery_Tibial	CDK14	ENSG00000058091.16		chr7	91132001	91132020	GGTT	0.147022	2	0.294044	0.782741
chr3	182845522	182848476	Whole_Blood	ATP11B	ENSG00000058063.15		chr3	182854753	182854800	AC	0.289776	1	0.289776	0.782741
chr15	85117839	85120797	Brain_Spinal_cord_cervical_c-1	PDE8A	ENSG00000073417.14		chr15	85123338	85123385	AC	0.290388	1	0.290388	0.782741
chr7	103486416	103489077	Testis	RELN	ENSG00000189056.13		chr7	103489204	103489229	GT	0.290517	1	0.290517	0.782741
chr22	45286096	45293181	Muscle_Skeletal	UPK3A	ENSG00000100373.9		chr22	45303062	45303095	GT	0.290858	1	0.290858	0.782741
chr14	24217636	24218133	Stomach	NEDD8	ENSG00000129559.12		chr14	24219302	24219328	GTT	0.291935	1	0.291935	0.782741
chr19	36235752	36245476	Testis	ZNF565	ENSG00000196357.11		chr19	36252916	36252945	AC	0.291975	1	0.291975	0.782741
chr2	211701753	211701967	Artery_Aorta	ERBB4	ENSG00000178568.14		chr2	211699325	211699336	AC	0.293363	1	0.293363	0.782741
chr7	50710990	50755887	Pancreas	GRB10	ENSG00000106070.17		chr7	50717451	50717466	AC	0.294251	1	0.294251	0.782741
chr12	1967910	1993264	Artery_Aorta	DCP1B	ENSG00000151065.13		chr12	1993628	1993657	GT	0.14738	2	0.294761	0.783192
chr9	20953065	20976420	Thyroid	FOCAD	ENSG00000188352.12		chr9	20946081	20946120	ATTC	0.295109	1	0.295109	0.783212
chr12	101726404	101730521	Adrenal_Gland	CHPT1	ENSG00000111666.10		chr12	101736709	101736740	GT	0.0296717	10	0.296717	0.783945
chr12	53543448	53552541	Testis	ATF7	ENSG00000170653.18		chr12	53539687	53539730	ATTC	0.296171	1	0.296171	0.783945
chr8	17120401	17132973	Testis	RP11-468H14.2	ENSG00000249258.2		chr8	17119533	17119576	AGAT	0.29643	1	0.29643	0.783945
chr9	36376127	36424613	Nerve_Tibial	RNF38	ENSG00000137075.17		chr9	36413696	36413707	AAAC	0.296748	1	0.296748	0.783945
chr8	27649800	27656782	Esophagus_Muscularis	SCARA3	ENSG00000168077.13		chr8	27644622	27644647	AG	0.0990746	3	0.297224	0.784158
chr6	43999508	44001043	Brain_Frontal_Cortex_BA9	RP5-1120P11.1	ENSG00000237686.6		chr6	44002767	44002793	CGG	0.29751	1	0.29751	0.784158
chr2	27275553	27276186	Testis	DNAJC5G	ENSG00000163793.12		chr2	27277250	27277281	GTTT	0.298834	1	0.298834	0.786057
chr3	169939589	169965978	Testis	RP11-379K17.4	ENSG00000239219.2		chr3	169935500	169935524	GTTTT	0.298913	1	0.298913	0.786057
chr1	235993872	236017148	Breast_Mammary_Tissue	NID1	ENSG00000116962.14		chr1	236002504	236002531	GTTT	0.0250556	12	0.300668	0.786096
chr15	69314794	69337341	Lung	PAQR5	ENSG00000137819.13		chr15	69325586	69325625	AATG	0.149681	2	0.299363	0.786096
chr19	50821871	50823703	Colon_Transverse	KLK1	ENSG00000167748.10		chr19	50817768	50817801	GT	0.300568	1	0.300568	0.786096
chr8	30104486	30137272	Cells_Cultured_fibroblasts	LEPROTL1	ENSG00000104660.17		chr8	30114277	30114296	GTTTT	0.300606	1	0.300606	0.786096
chr19	46028258	46028933	Testis	CTC-344H19.4	ENSG00000268401.1		chr19	46031752	46031789	GT	0.300895	1	0.300895	0.786096
chr4	55540787	55540878	Testis	CLOCK	ENSG00000134852.14		chr4	55544166	55544199	GT	0.300978	1	0.300978	0.786096
chr19	12649216	12649913	Nerve_Tibial	MAN2B1	ENSG00000104774.12		chr19	12646149	12646168	GT	0.011668	26	0.303369	0.789282
chr14	102438205	102440436	Colon_Sigmoid	TECPR2	ENSG00000196663.15		chr14	102432299	102432322	AC	0.0435142	7	0.304599	0.789282
chr11	35190065	35214852	Pancreas	CD44	ENSG00000026508.17		chr11	35211675	35211704	GT	0.0505827	6	0.303496	0.789282
chr7	92319512	92319620	Artery_Tibial	ANKIB1	ENSG00000001629.9		chr7	92311725	92311740	AC	0.0760418	4	0.304167	0.789282
chr9	81634301	81652214	Muscle_Skeletal	TLE1	ENSG00000196781.14		chr9	81652107	81652138	GT	0.303087	1	0.303087	0.789282
chr4	108089257	108163568	Testis	LEF1	ENSG00000138795.9		chr4	108126870	108126893	AC	0.303872	1	0.303872	0.789282
chr19	41844489	41847425	Testis	DMRTC2	ENSG00000142025.15		chr19	41851819	41851842	GTTT	0.304594	1	0.304594	0.789282
chr19	9158908	9160114	Esophagus_Mucosa	ZNF317	ENSG00000130803.14		chr19	9153149	9153180	GTTT	0.101823	3	0.30547	0.789657
chr18	756835	812114	Adipose_Visceral_Omentum	YES1	ENSG00000176105.13		chr18	812017	812037	CCG	0.15272	2	0.30544	0.789657
chr3	177160988	177197121	Thyroid	TBL1XR1	ENSG00000177565.16		chr3	177198866	177198907	GT	0.305773	1	0.305773	0.789657
chr9	114362533	114364560	Testis	AKNA	ENSG00000106948.16		chr9	114357515	114357536	AC	0.306466	1	0.306466	0.790559
chr12	933076	949602	Heart_Atrial_Appendage	RAD52	ENSG00000002016.17		chr12	939053	939084	AC	0.153517	2	0.307035	0.791139
chr8	138720792	138737524	Pituitary	COL22A1	ENSG00000169436.16		chr8	138725753	138725798	GT	0.307533	1	0.307533	0.791276
chr11	44587556	44594643	Adipose_Visceral_Omentum	CD82	ENSG00000085117.11		chr11	44593995	44594016	AC	0.308012	1	0.308012	0.791276
chr2	86220121	86232625	Heart_Atrial_Appendage	REEP1	ENSG00000068615.17		chr2	86223736	86223761	AG	0.30812	1	0.30812	0.791276
chr4	94302244	94308634	Breast_Mammary_Tissue	HPGDS	ENSG00000163106.10		chr4	94293257	94293296	GT	0.102914	3	0.308743	0.791993
chr9	91214425	91217277	Brain_Cortex	AUH	ENSG00000148090.11		chr9	91216440	91216463	GT	0.0142337	22	0.313142	0.792702
chr9	120997774	121005919	Adipose_Subcutaneous	C5	ENSG00000106804.7		chr9	121008928	121008955	GTTT	0.0344824	9	0.310342	0.792702
chr12	10702134	10704060	Testis	YBX3	ENSG00000060138.12		chr12	10707020	10707047	ATTT	0.034868	9	0.313812	0.792702
chr19	46468577	46469662	Brain_Frontal_Cortex_BA9	PNMAL1	ENSG00000182013.17		chr19	46467333	46467352	GT	0.0627461	5	0.31373	0.792702
chr2	26254474	26263380	Lung	HADHB	ENSG00000138029.13		chr2	26265598	26265621	AAC	0.0629063	5	0.314531	0.792702
chr7	142871989	142872372	Pancreas	TRPV5	ENSG00000127412.6		chr7	142878680	142878711	ATTC	0.103841	3	0.311524	0.792702
chr22	43151604	43161052	Whole_Blood	TSPO	ENSG00000100300.17		chr22	43164304	43164341	AC	0.155218	2	0.310436	0.792702
chr17	81810034	81810825	Nerve_Tibial	GCGR	ENSG00000215644.9		chr17	81817447	81817466	AAAAC	0.15693	2	0.31386	0.792702
chr12	118773302	118773611	Brain_Cortex	RP11-357K6.1	ENSG00000255618.1		chr12	118769314	118769331	AC	0.157021	2	0.314042	0.792702
chr9	33472412	33473789	Muscle_Skeletal	SUGT1P1	ENSG00000226823.1		chr9	33483458	33483487	GTTTT	0.310003	1	0.310003	0.792702
chr22	42385220	42397858	Whole_Blood	NFAM1	ENSG00000235568.6		chr22	42379488	42379523	GT	0.311135	1	0.311135	0.792702
chr1	119415561	119417368	Adrenal_Gland	HSD3B2	ENSG00000203859.9		chr1	119408886	119408897	AAAG	0.311444	1	0.311444	0.792702
chr7	132409187	132409985	Testis	PLXNA4	ENSG00000221866.9		chr7	132408449	132408476	AAAT	0.311957	1	0.311957	0.792702
chr12	66138166	66145841	Testis	TMBIM4	ENSG00000155957.17		chr12	66149888	66149903	GT	0.312028	1	0.312028	0.792702
chr5	123087939	123089196	Artery_Aorta	AC106786.1	ENSG00000223652.2		chr5	123094433	123094458	NA	0.313586	1	0.313586	0.792702
chr2	86153574	86159536	Adipose_Subcutaneous	IMMT	ENSG00000132305.20		chr2	86153305	86153342	GT	0.314463	1	0.314463	0.792702
chr1	201996263	201999902	Esophagus_Muscularis	RNPEP	ENSG00000176393.10		chr1	201996466	201996507	GT	0.0242262	13	0.314941	0.792866
chr16	2003728	2009524	Skin_Sun_Exposed_Lower_leg	ZNF598	ENSG00000167962.13		chr16	1995141	1995164	ATTT	0.0225733	14	0.316026	0.792995
chr17	72071231	72081921	Stomach	SOX9-AS1	ENSG00000234899.9		chr17	72086004	72086039	GT	0.0789864	4	0.315945	0.792995
chr1	111609227	111612189	Lung	LINC01160	ENSG00000231346.5		chr1	111610534	111610581	AC	0.157746	2	0.315493	0.792995
chr16	87951515	87981036	Heart_Atrial_Appendage	BANP	ENSG00000172530.20		chr16	87948975	87949024	AAAAC	0.158458	2	0.316916	0.793754
chr20	11810439	11868968	Testis	LINC00687	ENSG00000228422.3		chr20	11826960	11826995	AC	0.317019	1	0.317019	0.793754
chr13	50910438	50927407	Small_Intestine_Terminal_Ileum	RNASEH2B	ENSG00000136104.19		chr13	50931956	50931983	AC	0.0118066	27	0.318779	0.794703
chr12	107022192	107092804	Colon_Sigmoid	CRY1	ENSG00000008405.11		chr12	107032510	107032529	GT	0.0212183	15	0.318275	0.794703
chr4	55359488	55369832	Lung	SRD5A3	ENSG00000128039.10		chr4	55356701	55356724	ATTT	0.318373	1	0.318373	0.794703
chr3	53824067	53840929	Brain_Nucleus_accumbens_basal_ganglia	CHDH	ENSG00000016391.10		chr3	53850801	53850825	AAAAT	0.31864	1	0.31864	0.794703
chr7	79458999	79469432	Brain_Cerebellar_Hemisphere	MAGI2-AS3	ENSG00000234456.7		chr7	79471435	79471462	GT	0.106511	3	0.319534	0.794787
chr5	60945428	61073125	Breast_Mammary_Tissue	NDUFAF2	ENSG00000164182.10		chr5	61034913	61034942	GT	0.319232	1	0.319232	0.794787
chr13	34000865	34031137	Testis	RFC3	ENSG00000133119.12		chr13	34023715	34023738	CT	0.319849	1	0.319849	0.794787
chr19	15021919	15022739	Testis	CCDC105	ENSG00000160994.3		chr19	15030860	15030894	GTTTT	0.320243	1	0.320243	0.794908
chr20	14684959	14849904	Testis	MACROD2	ENSG00000172264.16		chr20	14857811	14857835	GTTTT	0.320611	1	0.320611	0.794964
chr11	90168992	90173824	Brain_Frontal_Cortex_BA9	NAALAD2	ENSG00000077616.10		chr11	90175929	90175952	GT	0.0104014	31	0.322444	0.796727
chr19	3855559	3868965	Pituitary	ZFR2	ENSG00000105278.10		chr19	3850724	3850750	GTT	0.0646791	5	0.323396	0.796727
chr19	57232685	57233460	Testis	AURKC	ENSG00000105146.12		chr19	57225191	57225218	GT	0.32181	1	0.32181	0.796727
chr16	4476487	4483637	Skin_Not_Sun_Exposed_Suprapubic	HMOX2	ENSG00000103415.11		chr16	4483161	4483224	GT	0.322062	1	0.322062	0.796727
chr11	63614068	63616587	Testis	PLA2G16	ENSG00000176485.11		chr11	63606426	63606463	GT	0.323069	1	0.323069	0.796727
chr5	142404010	142463970	Thyroid	AC005592.2	ENSG00000231185.6		chr5	142430510	142430529	GTTT	0.3234	1	0.3234	0.796727
chr1	61723772	61724920	Adipose_Visceral_Omentum	TM2D1	ENSG00000162604.12		chr1	61719410	61719433	CT	0.0540607	6	0.324364	0.79686
chr2	29014561	29022158	Muscle_Skeletal	TOGARAM2	ENSG00000189350.12		chr2	29010029	29010056	GT	0.16192	2	0.323841	0.79686
chr10	109947276	109953756	Testis	ADD3-AS1	ENSG00000203876.9		chr10	109957980	109957997	GT	0.324638	1	0.324638	0.79686
chr12	46387972	46470153	Muscle_Skeletal	RP11-446N19.1	ENSG00000272369.1		chr12	46389435	46389464	AC	0.324839	1	0.324839	0.79686
chr22	41586193	41588659	Minor_Salivary_Gland	PMM1	ENSG00000100417.11		chr22	41591911	41591934	AGTT	0.00936521	35	0.327782	0.797127
chr1	196685237	196689420	Artery_Tibial	CFH	ENSG00000000971.15		chr1	196689028	196689047	AAAG	0.0363974	9	0.327577	0.797127
chr11	406538	406843	Heart_Atrial_Appendage	SIGIRR	ENSG00000185187.12		chr11	407367	407381	CCCCG	0.0817746	4	0.327099	0.797127
chr1	93642343	93674614	Nerve_Tibial	BCAR3	ENSG00000137936.16		chr1	93660054	93660083	AC	0.163981	2	0.327961	0.797127
chr10	103106706	103139406	Thyroid	NT5C2	ENSG00000076685.18		chr10	103117649	103117663	GTT	0.325432	1	0.325432	0.797127
chr17	8413269	8419855	Whole_Blood	NDEL1	ENSG00000166579.15		chr17	8415428	8415451	ATTT	0.327045	1	0.327045	0.797127
chr7	136743988	136752264	Testis	AC009264.1	ENSG00000234352.9		chr7	136741655	136741676	GT	0.327307	1	0.327307	0.797127
chr11	78661591	78668937	Testis	TENM4	ENSG00000149256.15		chr11	78671286	78671297	AG	0.327509	1	0.327509	0.797127
chr4	76195864	76234303	Skin_Not_Sun_Exposed_Suprapubic	SCARB2	ENSG00000138760.9		chr4	76189475	76189498	AAC	0.328066	1	0.328066	0.797127
chr1	247635935	247640711	Testis	RP11-978I15.10	ENSG00000236817.5		chr1	247638097	247638130	GT	0.328635	1	0.328635	0.797668
chr2	9476039	9478222	Adipose_Visceral_Omentum	IAH1	ENSG00000134330.18		chr2	9474539	9474553	CCCCG	0.329496	1	0.329496	0.79861
chr3	31797841	31830040	Testis	OSBPL10	ENSG00000144645.13		chr3	31792861	31792908	AC	0.329717	1	0.329717	0.79861
chr1	100888864	100894633	Adipose_Subcutaneous	EXTL2	ENSG00000162694.13		chr1	100900010	100900029	AG	0.041326	8	0.330608	0.799085
chr14	51950765	51951887	Testis	GNG2	ENSG00000186469.8		chr14	51945899	51945918	GTTT	0.330585	1	0.330585	0.799085
chr10	125133612	125160319	Adipose_Visceral_Omentum	CTBP2	ENSG00000175029.16		chr10	125134882	125134902	AGGGGGC	0.0552527	6	0.331516	0.799601
chr14	53051927	53054438	Nerve_Tibial	DDHD1	ENSG00000100523.14		chr14	53043393	53043422	AC	0.331242	1	0.331242	0.799601
chr12	27244332	27297710	Esophagus_Mucosa	STK38L	ENSG00000211455.7		chr12	27306715	27306752	AC	0.0119131	28	0.333567	0.801186
chr17	4785659	4785901	Liver	VMO1	ENSG00000182853.11		chr17	4787527	4787550	GTTT	0.0238358	14	0.333701	0.801186
chr4	40235358	40242714	Spleen	RHOH	ENSG00000168421.12		chr4	40233926	40233960	AAAAT	0.11184	3	0.335521	0.801186
chr12	27710955	27755181	Brain_Caudate_basal_ganglia	MRPS35	ENSG00000061794.12		chr12	27748439	27748470	GT	0.166795	2	0.333591	0.801186
chr3	161369882	161371435	Skin_Sun_Exposed_Lower_leg	SPTSSB	ENSG00000196542.8		chr3	161378861	161378912	GT	0.167882	2	0.335764	0.801186
chr1	207071573	207078954	Thyroid	PFKFB2	ENSG00000123836.14		chr1	207063889	207063916	GT	0.333083	1	0.333083	0.801186
chr10	26437851	26438652	Cells_EBV-transformed_lymphocytes	APBB1IP	ENSG00000077420.15		chr10	26438485	26438514	AAAAT	0.334084	1	0.334084	0.801186
chr15	57706955	57708714	Cells_Cultured_fibroblasts	POLR2M	ENSG00000255529.7		chr15	57717927	57717942	GT	0.334331	1	0.334331	0.801186
chr9	34107565	34124198	Testis	DCAF12	ENSG00000198876.12		chr9	34110784	34110808	GTTTT	0.33511	1	0.33511	0.801186
chr2	120278778	120289580	Adrenal_Gland	RALB	ENSG00000144118.13		chr2	120277537	120277550	GT	0.335432	1	0.335432	0.801186
chr4	121822646	121823416	Skin_Sun_Exposed_Lower_leg	CCNA2	ENSG00000145386.9		chr4	121832010	121832043	GT	0.336004	1	0.336004	0.801186
chr5	87409129	87409290	Cells_Cultured_fibroblasts	CCNH	ENSG00000134480.13		chr5	87415931	87415952	GT	0.0842006	4	0.336802	0.801912
chr15	42663917	42665253	Artery_Tibial	STARD9	ENSG00000159433.11		chr15	42658289	42658318	GT	0.112335	3	0.337005	0.801912
chr12	10848407	10973655	Brain_Caudate_basal_ganglia	PRR4	ENSG00000111215.11		chr12	10978901	10978928	GTTT	0.338211	1	0.338211	0.803603
chr19	9860794	9936304	Skin_Sun_Exposed_Lower_leg	OLFM2	ENSG00000105088.8		chr19	9902027	9902042	AT	0.338414	1	0.338414	0.803603
chr3	30650460	30671638	Adipose_Subcutaneous	TGFBR2	ENSG00000163513.17		chr3	30648420	30648461	AC	0.338952	1	0.338952	0.80405
chr7	149871796	149880369	Testis	ATP6V0E2-AS1	ENSG00000204934.10		chr7	149883991	149884010	CCCT	0.340051	1	0.340051	0.805827
chr17	82419883	82428558	Skin_Not_Sun_Exposed_Suprapubic	HEXDC	ENSG00000169660.15		chr17	82437626	82437647	GT	0.0853441	4	0.341376	0.80664
chr18	5793742	5842714	Testis	MIR3976HG	ENSG00000261738.6		chr18	5847759	5847798	AC	0.341419	1	0.341419	0.80664
chr19	34683238	34684252	Heart_Atrial_Appendage	ZNF302	ENSG00000089335.20		chr19	34694030	34694050	GTT	0.341805	1	0.341805	0.80664
chr5	116471255	116472269	Testis	SEMA6A-AS1	ENSG00000248445.5		chr5	116467883	116467915	ACC	0.342147	1	0.342147	0.80664
chr5	116471255	116472269	Testis	SEMA6A-AS2	ENSG00000249167.1		chr5	116467883	116467915	ACC	0.342147	1	0.342147	0.80664
chr11	10634071	10652025	Nerve_Tibial	MRVI1	ENSG00000072952.18		chr11	10634754	10634785	AC	0.0110716	31	0.343221	0.806858
chr12	57489558	57490207	Esophagus_Gastroesophageal_Junction	MARS	ENSG00000166986.14		chr12	57492670	57492715	NA	0.0432182	8	0.345746	0.806858
chr19	43511566	43526515	Esophagus_Mucosa	ETHE1	ENSG00000105755.7		chr19	43503281	43503316	AG	0.0690846	5	0.345423	0.806858
chr12	6883919	6905585	Nerve_Tibial	LRRC23	ENSG00000010626.14		chr12	6896016	6896063	ACT	0.0860894	4	0.344357	0.806858
chr2	27357902	27358885	Prostate	AC074117.10	ENSG00000234072.1		chr2	27358248	27358271	GTTT	0.172397	2	0.344794	0.806858
chr11	30417633	30495296	Thyroid	MPPED2	ENSG00000066382.16		chr11	30449184	30449203	ATTC	0.343483	1	0.343483	0.806858
chr17	14159947	14182021	Testis	COX10	ENSG00000006695.10		chr17	14163237	14163272	ATTT	0.344231	1	0.344231	0.806858
chr17	14159947	14182021	Testis	AC005224.2	ENSG00000231595.1		chr17	14163237	14163272	ATTT	0.344231	1	0.344231	0.806858
chr10	122127142	122132609	Lung	TACC2	ENSG00000138162.18		chr10	122126317	122126346	GT	0.34547	1	0.34547	0.806858
chr5	25191033	25208873	Testis	LINC02211	ENSG00000245662.2		chr5	25214654	25214681	AC	0.345689	1	0.345689	0.806858
chr7	93146040	93148194	Colon_Transverse	SAMD9L	ENSG00000177409.11		chr7	93138432	93138449	GT	0.0496912	7	0.347839	0.809279
chr14	70063929	70166639	Muscle_Skeletal	SLC8A3	ENSG00000100678.18		chr14	70072599	70072630	ATGG	0.34733	1	0.34733	0.809279
chr2	37868272	37875743	Testis	LINC00211	ENSG00000237803.5		chr2	37872947	37872992	GT	0.347489	1	0.347489	0.809279
chr17	80058980	80065485	Vagina	CCDC40	ENSG00000141519.14		chr17	80061857	80061874	AACCCT	0.0158688	22	0.349113	0.809474
chr1	1754698	1756258	Skin_Sun_Exposed_Lower_leg	NADK	ENSG00000008130.15		chr1	1752909	1752935	AGG	0.0873324	4	0.34933	0.809474
chr6	111572983	111575643	Esophagus_Muscularis	TRAF3IP2	ENSG00000056972.18		chr6	111568433	111568490	NA	0.174375	2	0.34875	0.809474
chr1	220871691	220879849	Artery_Tibial	HLX-AS1	ENSG00000257551.1		chr1	220881764	220881813	AC	0.349065	1	0.349065	0.809474
chr15	68197628	68205121	Adipose_Subcutaneous	CALML4	ENSG00000129007.14		chr15	68207980	68207999	GT	0.0127433	28	0.356812	0.810487
chr13	110445882	110446798	Esophagus_Gastroesophageal_Junction	COL4A2	ENSG00000134871.17		chr13	110452121	110452148	GTTT	0.0220831	16	0.35333	0.810487
chr3	105867591	105868912	Muscle_Skeletal	CBLB	ENSG00000114423.18		chr3	105871333	105871356	AC	0.0507888	7	0.355521	0.810487
chr12	56714687	56715871	Esophagus_Muscularis	NACA	ENSG00000196531.10		chr12	56707004	56707047	GT	0.0879268	4	0.351707	0.810487
chr16	3144831	3144984	Small_Intestine_Terminal_Ileum	CASP16P	ENSG00000228146.7		chr16	3153958	3153977	AAAT	0.0889355	4	0.355742	0.810487
chr12	75482079	75495577	Lung	GLIPR1	ENSG00000139278.9		chr12	75490196	75490233	AC	0.0891489	4	0.356595	0.810487
chr15	55439581	55491123	Brain_Nucleus_accumbens_basal_ganglia	DYX1C1	ENSG00000256061.7		chr15	55467545	55467568	GT	0.11722	3	0.351658	0.810487
chr11	43680987	43750911	Brain_Putamen_basal_ganglia	HSD17B12	ENSG00000149084.12		chr11	43673660	43673695	GTTT	0.177259	2	0.354517	0.810487
chr2	74958892	74959341	Heart_Left_Ventricle	POLE4	ENSG00000115350.11		chr2	74956935	74956978	GT	0.178021	2	0.356043	0.810487
chr9	69325723	69336213	Thyroid	FAM189A2	ENSG00000135063.17		chr9	69317209	69317228	AC	0.35115	1	0.35115	0.810487
chr18	24489402	24490650	Testis	RP11-178F10.2	ENSG00000264695.1		chr18	24488273	24488304	AC	0.351297	1	0.351297	0.810487
chr12	42472564	42589465	Lung	PRICKLE1	ENSG00000139174.11		chr12	42560769	42560818	GT	0.352285	1	0.352285	0.810487
chr1	78046334	78080675	Liver	GIPC2	ENSG00000137960.5		chr1	78046370	78046389	CCGCG	0.352623	1	0.352623	0.810487
chr9	113284389	113286232	Lung	PRPF4	ENSG00000136875.12		chr9	113279336	113279375	GTTTT	0.352695	1	0.352695	0.810487
chr3	111986375	111986914	Nerve_Tibial	ABHD10	ENSG00000144827.8		chr3	111977309	111977324	AC	0.353349	1	0.353349	0.810487
chr7	96080488	96109979	Brain_Cerebellar_Hemisphere	DYNC1I1	ENSG00000158560.14		chr7	96100651	96100682	GT	0.353794	1	0.353794	0.810487
chr3	107324502	107380585	Testis	RP11-446H18.5	ENSG00000239828.6		chr3	107324567	107324590	ATTT	0.354957	1	0.354957	0.810487
chr3	107324502	107380585	Testis	LINC00882	ENSG00000242759.6		chr3	107324567	107324590	ATTT	0.354957	1	0.354957	0.810487
chr2	218558717	218560820	Skin_Sun_Exposed_Lower_leg	USP37	ENSG00000135913.10		chr2	218552919	218552942	GTTT	0.355434	1	0.355434	0.810487
chr16	15782477	15784698	Esophagus_Gastroesophageal_Junction	MYH11	ENSG00000133392.17		chr16	15788799	15788840	AC	0.356805	1	0.356805	0.810487
chr1	172442830	172443988	Whole_Blood	PIGC	ENSG00000135845.9		chr1	172441353	172441392	AC	0.357239	1	0.357239	0.810657
chr8	51913180	51946436	Muscle_Skeletal	RP11-110G21.1	ENSG00000228801.5		chr8	51909230	51909251	GT	0.358196	1	0.358196	0.81123
chr8	51913180	51946436	Muscle_Skeletal	RP11-546K22.1	ENSG00000253844.1		chr8	51909230	51909251	GT	0.358196	1	0.358196	0.81123
chr2	241882635	241887744	Pancreas	LINC01237	ENSG00000233806.7		chr2	241887493	241887514	CT	0.358729	1	0.358729	0.811638
chr16	87212212	87213050	Testis	RP11-899L11.1	ENSG00000261095.1		chr16	87211001	87211027	NA	0.35995	1	0.35995	0.812835
chr18	1566524	1649686	Testis	RP11-476K15.1	ENSG00000266602.1		chr18	1601168	1601199	GT	0.359965	1	0.359965	0.812835
chr6	148532966	148533771	Adipose_Visceral_Omentum	SASH1	ENSG00000111961.17		chr6	148537777	148537832	GT	0.0401191	9	0.361072	0.813372
chr17	45034999	45051553	Colon_Sigmoid	DCAKD	ENSG00000172992.11		chr17	45033182	45033206	ATTTT	0.180613	2	0.361226	0.813372
chr11	118693115	118699943	Testis	AP002954.4	ENSG00000255422.1		chr11	118700778	118700813	ATTT	0.361263	1	0.361263	0.813372
chr13	102636392	102637082	Artery_Tibial	TPP2	ENSG00000134900.11		chr13	102637542	102637562	GTT	0.120729	3	0.362187	0.813774
chr12	12989415	13000037	Cells_Cultured_fibroblasts	HEBP1	ENSG00000013583.8		chr12	13000455	13000478	AGCAGTGC	0.181397	2	0.362794	0.813774
chr2	65104806	65129893	Muscle_Skeletal	RAB1A	ENSG00000138069.16		chr2	65132061	65132088	GT	0.362056	1	0.362056	0.813774
chr16	83949107	83949403	Testis	MLYCD	ENSG00000103150.5		chr16	83957860	83957891	ATTT	0.363564	1	0.363564	0.813774
chr16	83949107	83949403	Testis	OSGIN1	ENSG00000140961.12		chr16	83957860	83957891	ATTT	0.363564	1	0.363564	0.813774
chr16	83949107	83949403	Testis	RP11-505K9.4	ENSG00000260300.5		chr16	83957860	83957891	ATTT	0.363564	1	0.363564	0.813774
chr17	81824554	81833238	Pancreas	MCRIP1	ENSG00000225663.7		chr17	81817447	81817466	AAAAC	0.0117658	31	0.364739	0.815611
chr6	158758629	158760640	Lung	SYTL3	ENSG00000164674.15		chr6	158765916	158765927	GTTT	0.18325	2	0.3665	0.817168
chr9	79658995	79704783	Testis	TLE4	ENSG00000106829.18		chr9	79695352	79695375	AC	0.365847	1	0.365847	0.817168
chr3	57368260	57375371	Testis	DNAH12	ENSG00000174844.14		chr3	57381237	57381262	AC	0.366281	1	0.366281	0.817168
chr1	160332557	160335242	Pituitary	COPA	ENSG00000122218.14		chr1	160333966	160333985	AC	0.040842	9	0.367578	0.817613
chr4	173925957	173929225	Esophagus_Gastroesophageal_Junction	RP11-161D15.1	ENSG00000250708.1		chr4	173928822	173928859	AC	0.0919345	4	0.367738	0.817613
chr1	206493991	206496112	Skin_Sun_Exposed_Lower_leg	RASSF5	ENSG00000266094.7		chr1	206501639	206501680	AC	0.183892	2	0.367784	0.817613
chr10	101237710	101237939	Muscle_Skeletal	LBX1-AS1	ENSG00000227128.4		chr10	101239703	101239734	AC	0.368121	1	0.368121	0.817613
chr6	26124749	26138054	Muscle_Skeletal	HIST1H2AC	ENSG00000180573.9		chr6	26139873	26139894	AC	0.184784	2	0.369568	0.818259
chr11	111377852	111379162	Cells_EBV-transformed_lymphocytes	POU2AF1	ENSG00000110777.11		chr11	111382944	111382971	AC	0.369593	1	0.369593	0.818259
chr13	51252201	51280450	Adipose_Subcutaneous	FAM124A	ENSG00000150510.16		chr13	51272567	51272594	AC	0.369912	1	0.369912	0.818259
chr17	80377796	80379418	Colon_Sigmoid	RNF213	ENSG00000173821.19		chr17	80379043	80379066	ATGCGTGC	0.370011	1	0.370011	0.818259
chr10	121482177	121483698	Testis	FGFR2	ENSG00000066468.22		chr10	121481390	121481421	GT	0.37019	1	0.37019	0.818259
chr8	80265993	80288817	Testis	RP11-941H19.3	ENSG00000253238.1		chr8	80280165	80280198	GT	0.370626	1	0.370626	0.818435
chr19	45416897	45421178	Brain_Cortex	ERCC1	ENSG00000012061.15		chr19	45410566	45410597	GT	0.0161738	23	0.371998	0.820678
chr7	151734311	151735900	Testis	PRKAG2	ENSG00000106617.13		chr7	151731523	151731536	AC	0.372358	1	0.372358	0.820685
chr3	9804013	9806210	Adrenal_Gland	ARPC4	ENSG00000241553.12		chr3	9798874	9798908	AAAAT	0.372838	1	0.372838	0.820957
chr19	17936579	17942656	Testis	CCDC124	ENSG00000007080.10		chr19	17927630	17927653	AAAT	0.046775	8	0.3742	0.822687
chr3	15273405	15304103	Breast_Mammary_Tissue	SH3BP5	ENSG00000131370.15		chr3	15294291	15294330	AC	0.374339	1	0.374339	0.822687
chr12	121165437	121166058	Nerve_Tibial	P2RX7	ENSG00000089041.16		chr12	121173177	121173204	GTTT	0.187706	2	0.375412	0.822688
chr17	48033944	48036851	Testis	RP5-890E16.2	ENSG00000263412.1		chr17	48026120	48026139	GT	0.374718	1	0.374718	0.822688
chr11	5887782	5937401	Testis	TRIM5	ENSG00000132256.18		chr11	5900376	5900403	GT	0.375242	1	0.375242	0.822688
chr12	10610680	10613439	Skin_Sun_Exposed_Lower_leg	MAGOHB	ENSG00000111196.9		chr12	10619349	10619370	GT	0.053728	7	0.376096	0.823208
chr14	22928615	22929252	Testis	HAUS4	ENSG00000092036.18		chr14	22923495	22923530	ATTT	0.18854	2	0.37708	0.823208
chr14	22928615	22929252	Testis	PRMT5	ENSG00000100462.15		chr14	22923495	22923530	ATTT	0.18854	2	0.37708	0.823208
chr8	38245950	38247713	Lung	DDHD2	ENSG00000085788.13		chr8	38238934	38238951	GT	0.376657	1	0.376657	0.823208
chr3	123225297	123245899	Skin_Sun_Exposed_Lower_leg	SEC22A	ENSG00000121542.11		chr3	123241003	123241042	AC	0.126233	3	0.378698	0.82446
chr11	34916486	34931404	Breast_Mammary_Tissue	PDHX	ENSG00000110435.11		chr11	34939469	34939504	GT	0.126304	3	0.378911	0.82446
chr2	165984776	166012841	Testis	AC010127.3	ENSG00000236107.7		chr2	165994651	165994678	AAAC	0.378454	1	0.378454	0.82446
chr15	68364798	68365146	Artery_Aorta	ITGA11	ENSG00000137809.16		chr15	68365548	68365573	AC	0.379087	1	0.379087	0.82446
chr12	52237717	52238680	Adipose_Visceral_Omentum	KRT7	ENSG00000135480.15		chr12	52231555	52231568	GT	0.12695	3	0.380852	0.827516
chr18	62045979	62072673	Muscle_Skeletal	PIGN	ENSG00000197563.10		chr18	62073171	62073204	AC	0.0548218	7	0.383753	0.827658
chr10	80082204	80086231	Skin_Not_Sun_Exposed_Suprapubic	TMEM254	ENSG00000133678.13		chr10	80080774	80080791	AC	0.0768308	5	0.384154	0.827658
chr17	31393184	31393323	Brain_Cerebellum	RAB11FIP4	ENSG00000131242.17		chr17	31402192	31402231	ATCC	0.190962	2	0.381924	0.827658
chr3	184155796	184163657	Brain_Cerebellum	DVL3	ENSG00000161202.17		chr3	184160536	184160553	GT	0.382063	1	0.382063	0.827658
chr11	74907273	74921214	Testis	XRRA1	ENSG00000166435.15		chr11	74931132	74931151	AC	0.382588	1	0.382588	0.827658
chr20	60088000	60098929	Testis	MIR646HG	ENSG00000228340.5		chr20	60100468	60100507	CTTTT	0.382686	1	0.382686	0.827658
chr3	46076926	46085794	Skin_Sun_Exposed_Lower_leg	XCR1	ENSG00000173578.7		chr3	46068782	46068805	GT	0.38349	1	0.38349	0.827658
chr9	112224210	112227411	Skin_Not_Sun_Exposed_Suprapubic	PTBP3	ENSG00000119314.15		chr9	112233273	112233316	AC	0.383785	1	0.383785	0.827658
chr5	17873086	17920227	Brain_Cortex	RP11-454P21.1	ENSG00000249937.5		chr5	17908762	17908779	GT	0.384001	1	0.384001	0.827658
chr1	118885516	118899028	Artery_Tibial	TBX15	ENSG00000092607.13		chr1	118885714	118885733	GT	0.384914	1	0.384914	0.828126
chr11	8962183	8964890	Adipose_Subcutaneous	TMEM9B	ENSG00000175348.10		chr11	8964370	8964393	AGCCTG	0.385427	1	0.385427	0.828126
chr15	82847247	82849689	Muscle_Skeletal	HOMER2	ENSG00000103942.12		chr15	82845219	82845260	GT	0.385451	1	0.385451	0.828126
chr6	166931118	166938895	Colon_Transverse	RNASET2	ENSG00000026297.15		chr6	166936351	166936374	AC	0.0214801	18	0.386641	0.828647
chr6	34425221	34426032	Brain_Cerebellum	RPS10	ENSG00000124614.13		chr6	34433367	34433390	AC	0.0275898	14	0.386257	0.828647
chr4	41627010	41631148	Muscle_Skeletal	LIMCH1	ENSG00000064042.17		chr4	41627020	41627053	GT	0.0966935	4	0.386774	0.828647
chr1	154449980	154465134	Whole_Blood	IL6R	ENSG00000160712.12		chr1	154450105	154450142	GT	0.0779156	5	0.389578	0.828771
chr15	90354764	90358851	Small_Intestine_Terminal_Ileum	ZNF774	ENSG00000196391.10		chr15	90349839	90349870	AAAT	0.1294	3	0.3882	0.828771
chr15	99131813	99136437	Esophagus_Gastroesophageal_Junction	RP11-6O2.3	ENSG00000261616.1		chr15	99128002	99128033	ATTC	0.194466	2	0.388932	0.828771
chr19	40076209	40081819	Adipose_Subcutaneous	ZNF780B	ENSG00000128000.15		chr19	40068339	40068362	AGAT	0.194857	2	0.389713	0.828771
chr11	125039069	125076757	Testis	SLC37A2	ENSG00000134955.11		chr11	125054384	125054421	GT	0.387462	1	0.387462	0.828771
chr1	41479502	41481095	Lung	EDN2	ENSG00000127129.9		chr1	41483125	41483144	AC	0.387738	1	0.387738	0.828771
chr2	55520479	55522102	Nerve_Tibial	CFAP36	ENSG00000163001.11		chr2	55527583	55527606	AAAT	0.389298	1	0.389298	0.828771
chr3	100010180	100146973	Cells_EBV-transformed_lymphocytes	CMSS1	ENSG00000184220.11		chr3	100067167	100067198	GTTT	0.389318	1	0.389318	0.828771
chr1	220770556	220780018	Lung	2022-03-02	ENSG00000117791.15		chr1	220773965	220773988	AC	0.195074	2	0.390148	0.828929
chr10	113721779	113725362	Esophagus_Muscularis	CASP7	ENSG00000165806.19		chr10	113733290	113733305	AT	0.196496	2	0.392993	0.833435
chr12	47415232	47418185	Testis	LINC02156	ENSG00000257906.1		chr12	47406394	47406415	AC	0.392952	1	0.392952	0.833435
chr1	63654466	63727736	Cells_EBV-transformed_lymphocytes	PGM1	ENSG00000079739.15		chr1	63722789	63722816	AT	0.393625	1	0.393625	0.834006
chr22	45328063	45330603	Colon_Sigmoid	FAM118A	ENSG00000100376.11		chr22	45323042	45323075	NA	0.0164959	24	0.395901	0.838057
chr17	3592383	3608427	Brain_Cerebellar_Hemisphere	SHPK	ENSG00000197417.7		chr17	3609323	3609350	CT	0.0198917	20	0.397834	0.839061
chr18	10455039	10471530	Skin_Not_Sun_Exposed_Suprapubic	APCDD1	ENSG00000154856.12		chr18	10459317	10459340	AC	0.0795399	5	0.3977	0.839061
chr11	479152	486939	Esophagus_Mucosa	PTDSS2	ENSG00000174915.11		chr11	494149	494193	CTGGG	0.39775	1	0.39775	0.839061
chr7	88277169	88282609	Testis	AC003991.3	ENSG00000228113.7		chr7	88273502	88273525	AC	0.397794	1	0.397794	0.839061
chr17	45290765	45316960	Esophagus_Mucosa	MAP3K14	ENSG00000006062.14		chr17	45291297	45291320	AC	0.0499147	8	0.399318	0.841419
chr17	48770097	48778152	Testis	TTLL6	ENSG00000170703.15		chr17	48777012	48777049	GT	0.400509	1	0.400509	0.842824
chr16	84648887	84650852	Artery_Aorta	KLHL36	ENSG00000135686.12		chr16	84646167	84646186	AGAT	0.401022	1	0.401022	0.842824
chr7	151198662	151198798	Testis	IQCA1L	ENSG00000278685.4		chr7	151206720	151206751	ATCT	0.401083	1	0.401083	0.842824
chr14	23470977	23475171	Skin_Sun_Exposed_Lower_leg	NGDN	ENSG00000129460.15		chr14	23479715	23479744	AAAAC	0.0114803	35	0.401811	0.843582
chr1	150276632	150280835	Prostate	C1orf54	ENSG00000118292.8		chr1	150284874	150284897	GTT	0.0114103	36	0.410771	0.843885
chr19	15680519	15682389	Adipose_Visceral_Omentum	CYP4F12	ENSG00000186204.14		chr19	15684757	15684798	GT	0.0180288	23	0.414662	0.843885
chr10	76324485	76557209	Muscle_Skeletal	C10orf11	ENSG00000148655.14		chr10	76542055	76542080	GT	0.0217434	19	0.413124	0.843885
chr2	239969762	239990074	Lung	NDUFA10	ENSG00000130414.11		chr2	239967980	239968009	GT	0.0256247	16	0.409995	0.843885
chr6	155253764	155254263	Brain_Cerebellar_Hemisphere	RP11-477D19.2	ENSG00000235381.1		chr6	155255618	155255637	GT	0.0278032	15	0.417049	0.843885
chr1	243426558	243475931	Thyroid	SDCCAG8	ENSG00000054282.15		chr1	243477000	243477033	AC	0.031079	13	0.404027	0.843885
chr15	35372203	35373521	Artery_Tibial	DPH6	ENSG00000134146.11		chr15	35366229	35366262	AC	0.0318487	13	0.414033	0.843885
chr19	40624082	40625857	Heart_Left_Ventricle	LTBP4	ENSG00000090006.17		chr19	40634800	40634835	ATC	0.067473	6	0.404838	0.843885
chr1	171732353	171738349	Adipose_Subcutaneous	VAMP4	ENSG00000117533.14		chr1	171736649	171736693	GTTTT	0.0694009	6	0.416406	0.843885
chr3	112345288	112347349	Adipose_Visceral_Omentum	CD200	ENSG00000091972.18		chr3	112352541	112352566	AG	0.0808732	5	0.404366	0.843885
chr3	188225527	188406112	Liver	LPP	ENSG00000145012.13		chr3	188311188	188311205	CT	0.0809042	5	0.404521	0.843885
chr12	2836956	2840842	Skin_Not_Sun_Exposed_Suprapubic	ITFG2	ENSG00000111203.11		chr12	2850654	2850688	GTTTT	0.0820476	5	0.410238	0.843885
chr2	43678925	43692514	Lung	PLEKHH2	ENSG00000152527.13		chr2	43678743	43678772	AGGTGG	0.101967	4	0.407866	0.843885
chr8	86342930	86374030	Skin_Not_Sun_Exposed_Suprapubic	WWP1	ENSG00000123124.13		chr8	86352221	86352240	ATTT	0.137111	3	0.411334	0.843885
chr15	90466091	90466269	Adipose_Visceral_Omentum	IQGAP1	ENSG00000140575.12		chr15	90465672	90465707	GTTT	0.201855	2	0.403709	0.843885
chr5	58993465	59038859	Muscle_Skeletal	PDE4D	ENSG00000113448.18		chr5	58986963	58986974	AT	0.202942	2	0.405883	0.843885
chr13	46457913	46460945	Prostate	LINC01198	ENSG00000231817.7		chr13	46468431	46468448	GT	0.205379	2	0.410758	0.843885
chr1	161076475	161077453	Skin_Not_Sun_Exposed_Suprapubic	NECTIN4	ENSG00000143217.8		chr1	161067571	161067594	CTTT	0.208166	2	0.416331	0.843885
chr3	47498466	47501650	Nerve_Tibial	ELP6	ENSG00000163832.15		chr3	47490593	47490647	AAGAG	0.208679	2	0.417358	0.843885
chr13	40094632	40095419	Pituitary	LINC00598	ENSG00000215483.9		chr13	40103554	40103581	GT	0.404591	1	0.404591	0.843885
chr9	115743070	115743780	Testis	RP11-284G10.1	ENSG00000228714.2		chr9	115740519	115740538	GT	0.40504	1	0.40504	0.843885
chr1	34886285	34899669	Testis	DLGAP3	ENSG00000116544.11		chr1	34896586	34896617	GT	0.405759	1	0.405759	0.843885
chr6	8026425	8027207	Cells_Cultured_fibroblasts	BLOC1S5	ENSG00000188428.19		chr6	8017386	8017407	GT	0.40727	1	0.40727	0.843885
chr17	65750724	65851804	Thyroid	CEP112	ENSG00000154240.16		chr17	65797060	65797089	GTT	0.407479	1	0.407479	0.843885
chr6	8558643	8607008	Testis	HULC	ENSG00000251164.1		chr6	8584249	8584298	GT	0.4085	1	0.4085	0.843885
chr1	10495321	10536213	Cells_Cultured_fibroblasts	PEX14	ENSG00000142655.12		chr1	10498281	10498315	AAAAC	0.408965	1	0.408965	0.843885
chr8	56538894	56540389	Testis	LINC00968	ENSG00000246430.6		chr8	56533075	56533118	AC	0.409185	1	0.409185	0.843885
chr8	56538894	56540389	Testis	RP11-17A4.3	ENSG00000253139.1		chr8	56533075	56533118	AC	0.409185	1	0.409185	0.843885
chr19	4247170	4249228	Whole_Blood	CCDC94	ENSG00000105248.15		chr19	4253199	4253236	AC	0.409229	1	0.409229	0.843885
chr3	158569668	158570171	Testis	RP11-538P18.2	ENSG00000243150.5		chr3	158578381	158578402	GT	0.410652	1	0.410652	0.843885
chr12	49131381	49188283	Testis	RP11-386G11.10	ENSG00000258017.1		chr12	49137175	49137204	AC	0.410814	1	0.410814	0.843885
chr1	24556169	24556447	Pancreas	NCMAP	ENSG00000184454.6		chr1	24565573	24565614	GT	0.412884	1	0.412884	0.843885
chr5	98929311	98976771	Brain_Putamen_basal_ganglia	LINC02062	ENSG00000248489.1		chr5	98951320	98951340	AAC	0.413004	1	0.413004	0.843885
chr6	6563104	6564295	Cells_EBV-transformed_lymphocytes	LY86-AS1	ENSG00000216863.9		chr6	6553936	6553955	GTTT	0.413647	1	0.413647	0.843885
chr19	48721259	48721854	Adipose_Visceral_Omentum	RASIP1	ENSG00000105538.9		chr19	48711560	48711587	AAAC	0.413969	1	0.413969	0.843885
chr4	25160753	25161418	Muscle_Skeletal	PI4K2B	ENSG00000038210.12		chr4	25161005	25161022	AC	0.414136	1	0.414136	0.843885
chr4	25160753	25161418	Muscle_Skeletal	SEPSECS-AS1	ENSG00000281501.1		chr4	25161005	25161022	AC	0.414136	1	0.414136	0.843885
chr2	26764998	26774251	Skin_Sun_Exposed_Lower_leg	SLC35F6	ENSG00000213699.8		chr2	26777744	26777763	GT	0.414164	1	0.414164	0.843885
chr1	93346865	93353908	Liver	DR1	ENSG00000117505.12		chr1	93357519	93357542	AAAT	0.415434	1	0.415434	0.843885
chr5	176982623	177006650	Cells_Cultured_fibroblasts	UIMC1	ENSG00000087206.16		chr5	177011591	177011614	ATT	0.415627	1	0.415627	0.843885
chr10	114974385	114994595	Testis	TRUB1	ENSG00000165832.5		chr10	114989627	114989674	AC	0.417115	1	0.417115	0.843885
chr18	60027183	60044303	Testis	RP11-866E20.3	ENSG00000267462.1		chr18	60038693	60038708	GT	0.4172	1	0.4172	0.843885
chr20	34078553	34084661	Lung	RALY	ENSG00000125970.11		chr20	34072930	34072959	GT	0.140083	3	0.420249	0.844545
chr2	99464985	99489817	Pituitary	REV1	ENSG00000135945.9		chr2	99476554	99476580	ATT	0.140173	3	0.420518	0.844545
chr2	29175600	29181572	Nerve_Tibial	CLIP4	ENSG00000115295.19		chr2	29169330	29169375	GT	0.210309	2	0.420619	0.844545
chr7	76330233	76358722	Esophagus_Mucosa	YWHAG	ENSG00000170027.6		chr7	76331287	76331306	CCTCT	0.419375	1	0.419375	0.844545
chr1	184568485	184590739	Liver	C1orf21	ENSG00000116667.12		chr1	184593272	184593293	GT	0.41952	1	0.41952	0.844545
chr8	136537059	136789835	Testis	LINC02055	ENSG00000254101.5		chr8	136798799	136798822	AAC	0.41965	1	0.41965	0.844545
chr15	45499502	45511138	Testis	SLC30A4	ENSG00000104154.6		chr15	45500615	45500662	AGAT	0.419891	1	0.419891	0.844545
chr3	167242643	167252126	Lung	ZBBX	ENSG00000169064.12		chr3	167251926	167251959	GT	0.4208	1	0.4208	0.844545
chr1	40041493	40059334	Artery_Tibial	CAP1	ENSG00000131236.16		chr1	40062774	40062797	GT	0.420988	1	0.420988	0.844545
chr12	8664115	8668633	Testis	RIMKLB	ENSG00000166532.15		chr12	8671911	8671935	AAAAC	0.211697	2	0.423393	0.84863
chr7	158749723	158752781	Artery_Tibial	ESYT2	ENSG00000117868.15		chr7	158746230	158746255	GT	0.211936	2	0.423873	0.848853
chr1	46361696	46402091	Breast_Mammary_Tissue	FAAH	ENSG00000117480.15		chr1	46376713	46376744	GT	0.212563	2	0.425126	0.850622
chr5	142140629	142151731	Muscle_Skeletal	NDFIP1	ENSG00000131507.10		chr5	142144193	142144216	GTT	0.426441	1	0.426441	0.851787
chr12	64312752	64330960	Nerve_Tibial	C12orf56	ENSG00000185306.12		chr12	64309498	64309525	GTTT	0.426607	1	0.426607	0.851787
chr22	20813506	20818483	Adipose_Visceral_Omentum	PI4KA	ENSG00000241973.10		chr22	20821590	20821605	AAAC	0.426819	1	0.426819	0.851787
chr14	70312997	70313800	Testis	RP11-718G2.5	ENSG00000259033.1		chr14	70320105	70320128	AAAC	0.427333	1	0.427333	0.852074
chr7	149285696	149287565	Testis	RP4-800G7.2	ENSG00000244560.6		chr7	149276654	149276685	AAAT	0.428694	1	0.428694	0.853891
chr6	165390982	165392646	Testis	PDE10A	ENSG00000112541.13		chr6	165394061	165394084	AAT	0.428986	1	0.428986	0.853891
chr17	79083123	79083761	Cells_Cultured_fibroblasts	ENGASE	ENSG00000167280.16		chr17	79081750	79081789	GGGGT	0.107543	4	0.430171	0.854339
chr2	230992402	230995277	Testis	SPATA3-AS1	ENSG00000238062.5		chr2	230984282	230984317	GT	0.429839	1	0.429839	0.854339
chr20	32997687	33000074	Testis	SUN5	ENSG00000167098.11		chr20	32988577	32988604	AAAT	0.430325	1	0.430325	0.854339
chr17	13496818	13600531	Esophagus_Gastroesophageal_Junction	HS3ST3A1	ENSG00000153976.2		chr17	13577868	13577889	AC	0.430855	1	0.430855	0.854653
chr7	117542108	117559464	Pancreas	CFTR	ENSG00000001626.14		chr7	117566249	117566286	AC	0.432132	1	0.432132	0.856448
chr14	73974985	73976324	Nerve_Tibial	ENTPD5	ENSG00000187097.12		chr14	73969716	73969739	ATTT	0.433313	1	0.433313	0.85805
chr18	62584595	62586849	Muscle_Skeletal	ZCCHC2	ENSG00000141664.9		chr18	62595020	62595043	GTT	0.217752	2	0.435504	0.860166
chr18	26659480	26703392	Minor_Salivary_Gland	PCAT18	ENSG00000265369.3		chr18	26665946	26665978	GTT	0.434827	1	0.434827	0.860166
chr14	99657143	99659428	Cells_Cultured_fibroblasts	HHIPL1	ENSG00000182218.9		chr14	99653330	99653344	GTTTT	0.435349	1	0.435349	0.860166
chr1	207471499	207472772	Small_Intestine_Terminal_Ileum	CR2	ENSG00000117322.17		chr1	207465409	207465422	AT	0.14552	3	0.436559	0.860773
chr6	47811731	47823983	Testis	OPN5	ENSG00000124818.15		chr6	47813069	47813113	AAC	0.436411	1	0.436411	0.860773
chr17	77320348	77402059	Muscle_Skeletal	2022-09-09	ENSG00000184640.17		chr17	77350611	77350638	GT	0.10943	4	0.437719	0.860923
chr7	1816228	1898200	Skin_Not_Sun_Exposed_Suprapubic	MAD1L1	ENSG00000002822.15		chr7	1887412	1887423	AC	0.14625	3	0.438751	0.860923
chr11	9033796	9045712	Prostate	SCUBE2	ENSG00000175356.12		chr11	9026424	9026455	GTTT	0.146293	3	0.43888	0.860923
chr19	676526	677792	Nerve_Tibial	FSTL3	ENSG00000070404.9		chr19	675682	675709	AC	0.437923	1	0.437923	0.860923
chr7	100374433	100397879	Adipose_Subcutaneous	PILRA	ENSG00000085514.15		chr7	100375731	100375758	AAAC	0.438152	1	0.438152	0.860923
chr6	77690903	77761130	Testis	MEI4	ENSG00000269964.2		chr6	77767694	77767719	AC	0.438262	1	0.438262	0.860923
chr19	53122743	53129579	Testis	ZNF415	ENSG00000170954.11		chr19	53124394	53124413	CT	0.0879611	5	0.439806	0.861023
chr12	94582538	94650353	Adipose_Visceral_Omentum	TMCC3	ENSG00000057704.12		chr12	94585685	94585708	GTTT	0.110013	4	0.440054	0.861023
chr5	56910394	56911169	Cells_Cultured_fibroblasts	SETD9	ENSG00000155542.11		chr5	56903304	56903321	GT	0.440052	1	0.440052	0.861023
chr1	171638722	171652008	Lung	MYOC	ENSG00000034971.16		chr1	171635280	171635305	AC	0.063068	7	0.441476	0.862402
chr2	31200625	31202134	Esophagus_Mucosa	CAPN14	ENSG00000214711.9		chr2	31210461	31210490	ATTTT	0.441508	1	0.441508	0.862402
chr7	96146696	96170045	Adipose_Subcutaneous	SLC25A13	ENSG00000004864.13		chr7	96164712	96164745	GT	0.442376	1	0.442376	0.863365
chr20	32029838	32030923	Nerve_Tibial	HCK	ENSG00000101336.13		chr20	32039241	32039258	AT	0.221574	2	0.443147	0.863973
chr11	43359113	43379233	Thyroid	TTC17	ENSG00000052841.14		chr11	43370796	43370827	GTTT	0.44369	1	0.44369	0.863973
chr6	10770204	10857445	Skin_Sun_Exposed_Lower_leg	TMEM14B	ENSG00000137210.13		chr6	10817130	10817153	GT	0.444097	1	0.444097	0.863973
chr11	21284563	21370853	Testis	NELL1	ENSG00000165973.18		chr11	21303071	21303112	ATATCT	0.44419	1	0.44419	0.863973
chr2	675630	677289	Adipose_Subcutaneous	TMEM18	ENSG00000151353.14		chr2	681562	681593	GT	0.019533	23	0.449259	0.864454
chr7	102433661	102436225	Brain_Nucleus_accumbens_basal_ganglia	ORAI2	ENSG00000160991.15		chr7	102431118	102431141	AC	0.0235777	19	0.447977	0.864454
chr6	155253764	155254263	Brain_Cerebellar_Hemisphere	TFB1M	ENSG00000029639.10		chr6	155255618	155255637	GT	0.0278032	16	0.444852	0.864454
chr17	17180088	17184823	Thyroid	MPRIP	ENSG00000133030.20		chr17	17193554	17193579	GT	0.0449908	10	0.449908	0.864454
chr1	108050735	108052311	Whole_Blood	RP11-356N1.2	ENSG00000226822.2		chr1	108047125	108047142	AC	0.224536	2	0.449073	0.864454
chr19	56385184	56390001	Artery_Tibial	ZNF582	ENSG00000018869.16		chr19	56382318	56382339	GT	0.224847	2	0.449695	0.864454
chr19	53993208	53998239	Testis	CACNG8	ENSG00000142408.4		chr19	53985938	53985961	AG	0.445354	1	0.445354	0.864454
chr17	80730706	80754010	Muscle_Skeletal	RPTOR	ENSG00000141564.13		chr17	80728447	80728472	GT	0.44751	1	0.44751	0.864454
chr2	190296953	190310754	Skin_Not_Sun_Exposed_Suprapubic	HIBCH	ENSG00000198130.15		chr2	190287028	190287059	AC	0.447561	1	0.447561	0.864454
chr18	9319120	9322062	Testis	RP11-888D10.3	ENSG00000264964.1		chr18	9331464	9331487	AAAT	0.448804	1	0.448804	0.864454
chr4	82881940	82891088	Brain_Spinal_cord_cervical_c-1	SEC31A	ENSG00000138674.16		chr4	82887389	82887413	CTTTT	0.449215	1	0.449215	0.864454
chr9	32500939	32526061	Cells_Cultured_fibroblasts	DDX58	ENSG00000107201.9		chr9	32504039	32504068	GT	0.449297	1	0.449297	0.864454
chr9	32500939	32526061	Cells_Cultured_fibroblasts	TOPORS	ENSG00000197579.7		chr9	32504039	32504068	GT	0.449297	1	0.449297	0.864454
chr3	132040321	132284043	Testis	CPNE4	ENSG00000196353.11		chr3	132048751	132048772	GT	0.449797	1	0.449797	0.864454
chr13	25567356	25570767	Testis	ATP8A2	ENSG00000132932.16		chr13	25572124	25572147	CT	0.450072	1	0.450072	0.864454
chr9	70216421	70257915	Thyroid	SMC5-AS1	ENSG00000268364.1		chr9	70209543	70209558	ATCT	0.225862	2	0.451724	0.866182
chr10	70744189	70745226	Brain_Caudate_basal_ganglia	ADAMTS14	ENSG00000138316.10		chr10	70749609	70749636	GT	0.451698	1	0.451698	0.866182
chr21	46266010	46266982	Muscle_Skeletal	MCM3AP	ENSG00000160294.10		chr21	46258738	46258757	GT	0.22682	2	0.45364	0.86913
chr1	9038929	9039056	Cells_EBV-transformed_lymphocytes	SLC2A5	ENSG00000142583.17		chr1	9046666	9046701	AC	0.454455	1	0.454455	0.869968
chr16	4204634	4242007	Heart_Left_Ventricle	SRL	ENSG00000185739.13		chr16	4220279	4220308	GT	0.456095	1	0.456095	0.872381
chr14	49626048	49633287	Adrenal_Gland	DNAAF2	ENSG00000165506.14		chr14	49630235	49630258	ATTT	0.041525	11	0.456775	0.872767
chr2	104754440	104754560	Brain_Nucleus_accumbens_basal_ganglia	LINC01114	ENSG00000234177.5		chr2	104751329	104751364	AC	0.228717	2	0.457434	0.872767
chr2	44921216	44922191	Brain_Nucleus_accumbens_basal_ganglia	LINC01833	ENSG00000259439.2		chr2	44923808	44923831	NA	0.457123	1	0.457123	0.872767
chr16	78164289	78386860	Testis	WWOX	ENSG00000186153.16		chr16	78295714	78295745	AAAC	0.457853	1	0.457853	0.872842
chr20	2859807	2860449	Brain_Cerebellum	VPS16	ENSG00000215305.9		chr20	2854239	2854264	AC	0.0917998	5	0.458999	0.872911
chr6	149884504	149889348	Skin_Not_Sun_Exposed_Suprapubic	RAET1E	ENSG00000164520.11		chr6	149891485	149891504	GT	0.153009	3	0.459028	0.872911
chr17	46923269	46929520	Heart_Left_Ventricle	GOSR2	ENSG00000108433.16		chr17	46918597	46918638	GT	0.45875	1	0.45875	0.872911
chr3	56564125	56566594	Vagina	CCDC66	ENSG00000180376.16		chr3	56566108	56566137	GTTTT	0.0287315	16	0.459703	0.873474
chr3	35679960	35681714	Muscle_Skeletal	ARPP21	ENSG00000172995.16		chr3	35675799	35675837	ATG	0.46012	1	0.46012	0.873544
chr13	60547491	60567525	Thyroid	TDRD3	ENSG00000083544.13		chr13	60567345	60567369	CTTTT	0.461209	1	0.461209	0.87489
chr3	139344718	139346878	Cells_Cultured_fibroblasts	MRPS22	ENSG00000175110.11		chr3	139338550	139338565	AC	0.462918	1	0.462918	0.877408
chr1	15736863	15739224	Muscle_Skeletal	SLC25A34	ENSG00000162461.7		chr1	15730047	15730076	CGGGG	0.231716	2	0.463432	0.87766
chr5	150518919	150520868	Artery_Tibial	NDST1	ENSG00000070614.14		chr5	150516977	150517018	GT	0.15539	3	0.466169	0.882117
chr15	89633883	89642203	Cells_Cultured_fibroblasts	KIF7	ENSG00000166813.14		chr15	89633009	89633024	CCCT	0.0779729	6	0.467838	0.883821
chr18	35005553	35025159	Brain_Spinal_cord_cervical_c-1	MAPRE2	ENSG00000166974.12		chr18	35015634	35015679	GT	0.46783	1	0.46783	0.883821
chr5	95752350	95763508	Cells_Cultured_fibroblasts	RHOBTB3	ENSG00000164292.12		chr5	95763803	95763830	GT	0.468829	1	0.468829	0.884379
chr12	10388875	10389943	Adipose_Subcutaneous	KLRK1	ENSG00000213809.8		chr12	10398357	10398386	AC	0.468902	1	0.468902	0.884379
chr9	87974035	87974372	Testis	CDK20	ENSG00000156345.17		chr9	87984092	87984105	AC	0.0363234	13	0.472204	0.885058
chr3	108214021	108218535	Cells_Cultured_fibroblasts	IFT57	ENSG00000114446.4		chr3	108209917	108209936	AC	0.094372	5	0.47186	0.885058
chr22	42150909	42151144	Thyroid	CYP2D8P	ENSG00000226450.2		chr22	42148527	42148560	GT	0.236129	2	0.472259	0.885058
chr10	15611796	15613660	Artery_Aorta	ITGA8	ENSG00000077943.7		chr10	15620309	15620334	GT	0.469877	1	0.469877	0.885058
chr5	77325729	77328998	Adipose_Subcutaneous	PDE8B	ENSG00000113231.13		chr5	77332984	77332997	AT	0.470202	1	0.470202	0.885058
chr16	31424577	31426015	Liver	ITGAD	ENSG00000156886.11		chr16	31426580	31426611	GT	0.470512	1	0.470512	0.885058
chr1	7249626	7370081	Testis	CAMTA1-IT1	ENSG00000237402.1		chr1	7371240	7371271	GTTT	0.471161	1	0.471161	0.885058
chr3	32153696	32158876	Skin_Not_Sun_Exposed_Suprapubic	GPD1L	ENSG00000152642.10		chr3	32144823	32144854	AC	0.472338	1	0.472338	0.885058
chr14	104756760	104766790	Brain_Cerebellar_Hemisphere	SIVA1	ENSG00000184990.12		chr14	104762932	104762951	AAAT	0.157609	3	0.472826	0.885251
chr6	149772247	149773138	Colon_Sigmoid	PCMT1	ENSG00000120265.16		chr6	149773351	149773395	GTTTT	0.474289	1	0.474289	0.887267
chr11	22491783	22491915	Testis	LINC01495	ENSG00000255323.5		chr11	22496817	22496850	GT	0.475156	1	0.475156	0.887859
chr4	86335156	86354530	Testis	MAPK10	ENSG00000109339.19		chr4	86356044	86356071	GT	0.475472	1	0.475472	0.887859
chr4	4860368	4862701	Adipose_Subcutaneous	MSX1	ENSG00000163132.6		chr4	4861897	4861920	AC	0.475763	1	0.475763	0.887859
chr1	9235066	9244925	Cells_Cultured_fibroblasts	H6PD	ENSG00000049239.12		chr1	9251437	9251472	GTT	0.0190804	25	0.47701	0.889465
chr6	32954788	32958170	Thyroid	HLA-DMA	ENSG00000204257.14		chr6	32961218	32961235	GT	0.0319275	15	0.478912	0.892289
chr1	225783368	225789240	Adrenal_Gland	SRP9	ENSG00000143742.12		chr1	225799167	225799199	GTT	0.0219977	22	0.48395	0.892576
chr1	150505705	150507979	Brain_Cerebellar_Hemisphere	TARS2	ENSG00000143374.16		chr1	150507567	150507590	AAAT	0.159875	3	0.479625	0.892576
chr8	12952358	12990834	Minor_Salivary_Gland	KIAA1456	ENSG00000250305.8		chr8	12950538	12950561	CTTT	0.160562	3	0.481685	0.892576
chr1	109106659	109107007	Pituitary	C1orf194	ENSG00000179902.12		chr1	109098666	109098689	ACAT	0.160745	3	0.482236	0.892576
chr8	124556405	124557681	Muscle_Skeletal	MTSS1	ENSG00000170873.18		chr8	124564692	124564719	AC	0.162225	3	0.486674	0.892576
chr7	150716690	150719042	Thyroid	GIMAP2	ENSG00000106560.10		chr7	150721888	150721919	AC	0.241726	2	0.483451	0.892576
chr7	150716690	150719042	Thyroid	GIMAP1	ENSG00000213203.2		chr7	150721888	150721919	AC	0.241726	2	0.483451	0.892576
chr13	49663195	49691254	Lung	EBPL	ENSG00000123179.13		chr13	49673963	49673992	GT	0.242817	2	0.485633	0.892576
chr1	156893837	156903918	Artery_Tibial	PEAR1	ENSG00000187800.13		chr1	156888260	156888293	AC	0.480418	1	0.480418	0.892576
chr7	142943883	142952509	Testis	KEL	ENSG00000197993.7		chr7	142935083	142935130	ATGT	0.480528	1	0.480528	0.892576
chr15	42878684	42919759	Brain_Cerebellar_Hemisphere	TTBK2	ENSG00000128881.16		chr15	42911962	42911985	GT	0.481227	1	0.481227	0.892576
chr10	1019834	1025816	Muscle_Skeletal	IDI2	ENSG00000148377.5		chr10	1025011	1025052	AC	0.482105	1	0.482105	0.892576
chr9	103320186	103324657	Testis	LINC01492	ENSG00000225564.6		chr9	103322734	103322761	GT	0.482117	1	0.482117	0.892576
chr1	153687789	153688953	Adipose_Visceral_Omentum	NPR1	ENSG00000169418.9		chr1	153678794	153678815	CT	0.483411	1	0.483411	0.892576
chr9	120821464	120824494	Lung	PSMD5	ENSG00000095261.13		chr9	120813371	120813404	AC	0.484312	1	0.484312	0.892576
chr12	10627724	10629493	Pituitary	STYK1	ENSG00000060140.8		chr12	10630033	10630092	CT	0.484683	1	0.484683	0.892576
chr1	34202259	34212210	Testis	C1orf94	ENSG00000142698.14		chr1	34195780	34195809	GT	0.48577	1	0.48577	0.892576
chr11	62639731	62646562	Cells_Cultured_fibroblasts	GANAB	ENSG00000089597.16		chr11	62638584	62638643	CCTT	0.485775	1	0.485775	0.892576
chr8	78516468	78572811	Muscle_Skeletal	PKIA	ENSG00000171033.12		chr8	78572542	78572573	AC	0.486339	1	0.486339	0.892576
chr15	40316775	40317396	Testis	PLCB2	ENSG00000137841.11		chr15	40322228	40322269	GT	0.486824	1	0.486824	0.892576
chr11	1480885	1501077	Skin_Sun_Exposed_Lower_leg	MOB2	ENSG00000182208.13		chr11	1506258	1506287	AAAAC	0.487753	1	0.487753	0.893567
chr20	13239166	13249233	Testis	ISM1	ENSG00000101230.5		chr20	13249781	13249835	GTTTT	0.488197	1	0.488197	0.893668
chr2	72733118	72741304	Cells_Cultured_fibroblasts	EXOC6B	ENSG00000144036.15		chr2	72730580	72730621	GT	0.488952	1	0.488952	0.894339
chr1	183240391	183258722	Thyroid	LAMC2	ENSG00000058085.14		chr1	183254419	183254446	AAAC	0.490276	1	0.490276	0.896048
chr3	63278742	63480832	Brain_Cerebellum	SYNPR	ENSG00000163630.10		chr3	63300332	63300355	ATCT	0.492183	1	0.492183	0.89882
chr15	95256776	95288302	Colon_Transverse	LINC01197	ENSG00000248441.6		chr15	95292429	95292462	GT	0.0705671	7	0.49397	0.8989
chr15	101178980	101187993	Breast_Mammary_Tissue	RP11-505E24.2	ENSG00000259755.1		chr15	101186320	101186351	ATTT	0.123479	4	0.493916	0.8989
chr7	128719083	128723197	Testis	FAM71F1	ENSG00000135248.15		chr7	128725339	128725378	CCTT	0.493039	1	0.493039	0.8989
chr3	159998317	160009112	Testis	IL12A-AS1	ENSG00000244040.5		chr3	160004377	160004411	AAAAC	0.493316	1	0.493316	0.8989
chr19	15770475	15770986	Nerve_Tibial	CYP4F24P	ENSG00000267594.5		chr19	15770451	15770468	CT	0.49418	1	0.49418	0.8989
chr22	46990110	46997634	Adipose_Visceral_Omentum	TBC1D22A	ENSG00000054611.13		chr22	46995514	46995533	GT	0.0825947	6	0.495568	0.900001
chr3	120596539	120601111	Muscle_Skeletal	NDUFB4	ENSG00000065518.7		chr3	120594166	120594181	GTTT	0.495548	1	0.495548	0.900001
chr16	53637854	53641033	Brain_Spinal_cord_cervical_c-1	RPGRIP1L	ENSG00000103494.12		chr16	53636942	53636987	GT	0.0145962	34	0.496272	0.900569
chr2	100820414	100904733	Skin_Sun_Exposed_Lower_leg	NPAS2	ENSG00000170485.16		chr2	100875462	100875505	AC	0.497073	1	0.497073	0.900602
chr2	100820414	100904733	Skin_Sun_Exposed_Lower_leg	AC092168.2	ENSG00000232034.1		chr2	100875462	100875505	AC	0.497073	1	0.497073	0.900602
chr2	20037614	20040891	Adipose_Subcutaneous	LAPTM4A	ENSG00000068697.6		chr2	20030892	20030912	GTT	0.0996002	5	0.498001	0.901574
chr14	49599203	49602370	Adipose_Visceral_Omentum	LRR1	ENSG00000165501.16		chr14	49591288	49591319	AAAC	0.249792	2	0.499585	0.901677
chr5	132313768	132327277	Breast_Mammary_Tissue	SLC22A4	ENSG00000197208.5		chr5	132328578	132328604	AAC	0.499547	1	0.499547	0.901677
chr5	60922155	60928864	Thyroid	ERCC8	ENSG00000049167.13		chr5	60933939	60933956	GT	0.499603	1	0.499603	0.901677
chr5	138753171	138781923	Testis	CTNNA1	ENSG00000044115.20		chr5	138756028	138756055	ATTT	0.499626	1	0.499626	0.901677
chr12	991322	1027748	Nerve_Tibial	ERC1	ENSG00000082805.19		chr12	1004807	1004848	GT	0.0715579	7	0.500905	0.902101
chr14	21032029	21032320	Testis	TPPP2	ENSG00000179636.14		chr14	21040981	21041004	AAAC	0.500948	1	0.500948	0.902101
chr19	7479737	7482033	Testis	PEX11G	ENSG00000104883.7		chr19	7474755	7474784	GT	0.501036	1	0.501036	0.902101
chr3	42569073	42579477	Nerve_Tibial	RP4-613B23.1	ENSG00000230084.5		chr3	42578540	42578571	GT	0.50203	1	0.50203	0.903183
chr1	109657279	109657772	Skin_Sun_Exposed_Lower_leg	GSTM4	ENSG00000168765.16		chr1	109652981	109653016	ATTT	0.252071	2	0.504141	0.905462
chr2	73081663	73088050	Artery_Tibial	RAB11FIP5	ENSG00000135631.16		chr2	73081097	73081126	AGG	0.252435	2	0.504871	0.905462
chr19	48896556	48897837	Testis	TULP2	ENSG00000104804.7		chr19	48897949	48897980	AAAT	0.504235	1	0.504235	0.905462
chr4	116196737	116296959	Testis	RP11-659O3.1	ENSG00000248173.5		chr4	116259452	116259481	GTT	0.504529	1	0.504529	0.905462
chr19	48993902	48999319	Esophagus_Muscularis	RUVBL2	ENSG00000183207.13		chr19	48996503	48996540	GT	0.0298315	17	0.507136	0.907945
chr2	54057360	54135453	Lung	ACYP2	ENSG00000170634.12		chr2	54093943	54093974	AAAC	0.0634298	8	0.507439	0.907945
chr3	197871462	197875698	Lung	LRCH3	ENSG00000186001.12		chr3	197866826	197866849	AAAC	0.253362	2	0.506724	0.907945
chr19	1534041	1535065	Brain_Cortex	PLK5	ENSG00000185988.11		chr19	1536797	1536812	GTTT	0.0391011	13	0.508314	0.908099
chr2	5942768	5946854	Pituitary	LINC01105	ENSG00000232044.6		chr2	5940267	5940314	ACAT	0.169357	3	0.50807	0.908099
chr2	85402158	85413984	Testis	CAPG	ENSG00000042493.15		chr2	85408339	85408380	GT	0.509427	1	0.509427	0.909216
chr1	111727804	111739186	Muscle_Skeletal	FAM212B	ENSG00000197852.9		chr1	111732569	111732600	GT	0.50973	1	0.50973	0.909216
chr21	39345274	39348292	Stomach	HMGN1	ENSG00000205581.10		chr21	39345110	39345137	GT	0.0141872	36	0.510738	0.909408
chr12	94971620	95002739	Esophagus_Mucosa	NDUFA12	ENSG00000184752.12		chr12	94986086	94986113	ATTT	0.056946	9	0.512514	0.909408
chr2	232557680	232557884	Testis	EIF4E2	ENSG00000135930.13		chr2	232564435	232564469	ATTTT	0.0729528	7	0.51067	0.909408
chr8	42472654	42541538	Skin_Sun_Exposed_Lower_leg	SLC20A2	ENSG00000168575.9		chr8	42528967	42528987	AAT	0.256453	2	0.512906	0.909408
chr5	147845937	147850464	Artery_Aorta	C5orf46	ENSG00000178776.4		chr5	147836297	147836330	AC	0.2565	2	0.512999	0.909408
chr7	151075436	151076034	Brain_Cerebellum	RP11-148K1.12	ENSG00000244151.1		chr7	151084843	151084886	AC	0.511675	1	0.511675	0.909408
chr21	38122411	38154433	Testis	DSCR8	ENSG00000198054.11		chr21	38126691	38126716	AC	0.512516	1	0.512516	0.909408
chr1	32925662	32926124	Testis	TMEM54	ENSG00000121900.18		chr1	32927406	32927437	AAAC	0.512678	1	0.512678	0.909408
chr1	6129069	6130148	Testis	CHD5	ENSG00000116254.17		chr1	6132881	6132910	AG	0.516037	1	0.516037	0.914089
chr11	60403061	60415437	Nerve_Tibial	MS4A14	ENSG00000166928.10		chr11	60422467	60422490	GT	0.12987	4	0.519478	0.915385
chr12	4814778	4850738	Nerve_Tibial	GALNT8	ENSG00000130035.6		chr12	4820547	4820592	AC	0.259525	2	0.51905	0.915385
chr12	4814778	4850738	Nerve_Tibial	RP3-377H17.2	ENSG00000255608.1		chr12	4820547	4820592	AC	0.259525	2	0.51905	0.915385
chr14	35881780	35886794	Testis	RP11-116N8.1	ENSG00000258342.1		chr14	35893008	35893047	GT	0.518526	1	0.518526	0.915385
chr1	71611146	71698008	Colon_Sigmoid	NEGR1	ENSG00000172260.14		chr1	71674587	71674620	GT	0.518995	1	0.518995	0.915385
chr3	46720003	46734065	Testis	PRSS46	ENSG00000261603.1		chr3	46732207	46732231	AAAAG	0.519517	1	0.519517	0.915385
chr11	68438682	68439777	Testis	LRP5	ENSG00000162337.11		chr11	68435484	68435497	AG	0.519554	1	0.519554	0.915385
chr10	29415412	29458274	Brain_Caudate_basal_ganglia	SVIL-AS1	ENSG00000224597.9		chr10	29444476	29444491	AT	0.018013	29	0.522377	0.917709
chr19	53175571	53182884	Artery_Tibial	ZNF665	ENSG00000197497.10		chr19	53177537	53177571	GTTTT	0.0291324	18	0.524382	0.917709
chr20	53975430	53985287	Nerve_Tibial	BCAS1	ENSG00000064787.13		chr20	53994889	53994916	GT	0.0751594	7	0.526116	0.917709
chr7	72833928	72836577	Artery_Tibial	SBDSP1	ENSG00000225648.5		chr7	72846111	72846140	AAC	0.0877245	6	0.526347	0.917709
chr12	118068597	118071052	Adipose_Visceral_Omentum	VSIG10	ENSG00000176834.13		chr12	118068523	118068546	AGG	0.104767	5	0.523836	0.917709
chr4	101790950	101855035	Thyroid	BANK1	ENSG00000153064.11		chr4	101847199	101847236	GT	0.174786	3	0.524359	0.917709
chr1	52643002	52648451	Spleen	GPX7	ENSG00000116157.5		chr1	52645397	52645421	GTTTT	0.262305	2	0.524611	0.917709
chr11	74139828	74161399	Cells_Cultured_fibroblasts	C2CD3	ENSG00000168014.16		chr11	74151306	74151333	AAAT	0.52328	1	0.52328	0.917709
chr15	69671907	69677546	Prostate	PCAT29	ENSG00000259641.5		chr15	69680150	69680165	GT	0.523594	1	0.523594	0.917709
chr12	18684279	18694910	Testis	PLCZ1	ENSG00000139151.14		chr12	18701607	18701651	AGG	0.523978	1	0.523978	0.917709
chr4	7396355	7531530	Nerve_Tibial	SORCS2	ENSG00000184985.16		chr4	7400462	7400488	ACC	0.524663	1	0.524663	0.917709
chr1	155192283	155192786	Adrenal_Gland	THBS3	ENSG00000169231.13		chr1	155186469	155186492	AC	0.524963	1	0.524963	0.917709
chr8	108475963	108476679	Testis	EMC2	ENSG00000104412.7		chr8	108474555	108474576	AC	0.525815	1	0.525815	0.917709
chr1	52802139	52813536	Adipose_Subcutaneous	ZYG11B	ENSG00000162378.12		chr1	52814705	52814732	AC	0.52679	1	0.52679	0.917709
chr12	16420814	16437388	Testis	MGST1	ENSG00000008394.12		chr12	16434443	16434462	GT	0.526855	1	0.526855	0.917709
chr10	127410924	127415152	Stomach	DOCK1	ENSG00000150760.12		chr10	127420905	127420932	GTTT	0.132149	4	0.528596	0.918156
chr12	10160021	10160786	Testis	OLR1	ENSG00000173391.8		chr12	10162956	10162975	AC	0.132177	4	0.528708	0.918156
chr19	48074874	48077893	Brain_Cerebellum	PLA2G4C	ENSG00000105499.13		chr19	48084041	48084080	AC	0.2641	2	0.5282	0.918156
chr5	55656774	55664693	Testis	SLC38A9	ENSG00000177058.11		chr5	55658156	55658175	AAAAT	0.527733	1	0.527733	0.918156
chr21	32467848	32495027	Pituitary	EVA1C	ENSG00000166979.12		chr21	32483963	32483998	GT	0.0760752	7	0.532526	0.918548
chr3	42219390	42219494	Adipose_Visceral_Omentum	TRAK1	ENSG00000182606.14		chr3	42215502	42215525	GT	0.106253	5	0.531265	0.918548
chr3	158571347	158588852	Adipose_Visceral_Omentum	MLF1	ENSG00000178053.17		chr3	158578381	158578402	GT	0.177033	3	0.5311	0.918548
chr2	62590577	62631402	Ovary	AC092155.4	ENSG00000226622.5		chr2	62637802	62637825	GTTT	0.177493	3	0.532478	0.918548
chr4	46845014	46909160	Testis	COX7B2	ENSG00000170516.16		chr4	46878021	46878042	GT	0.53044	1	0.53044	0.918548
chr16	30852322	30875269	Cells_Cultured_fibroblasts	BCL7C	ENSG00000099385.11		chr16	30881393	30881426	AC	0.53109	1	0.53109	0.918548
chr5	72238128	72295531	Testis	MRPS27	ENSG00000113048.16		chr5	72244871	72244892	AG	0.531701	1	0.531701	0.918548
chr7	157207935	157216867	Brain_Cerebellum	UBE3C	ENSG00000009335.17		chr7	157211168	157211193	AG	0.531752	1	0.531752	0.918548
chr9	122371272	122371613	Skin_Sun_Exposed_Lower_leg	PTGS1	ENSG00000095303.14		chr9	122367177	122367194	AAAACC	0.531974	1	0.531974	0.918548
chr8	142273587	142274781	Artery_Tibial	TSNARE1	ENSG00000171045.14		chr8	142265125	142265136	AC	0.0168578	32	0.539448	0.919354
chr19	58246794	58277183	Adipose_Subcutaneous	ZNF8	ENSG00000278129.1		chr19	58241922	58241943	CT	0.0213699	25	0.534249	0.919354
chr11	86326676	86337379	Brain_Nucleus_accumbens_basal_ganglia	HIKESHI	ENSG00000149196.15		chr11	86342479	86342522	GT	0.0223435	24	0.536244	0.919354
chr19	44484435	44497284	Nerve_Tibial	ZNF180	ENSG00000167384.10		chr19	44493749	44493764	AG	0.0270235	20	0.540471	0.919354
chr4	8511003	8515312	Ovary	RP11-689P11.2	ENSG00000205959.3		chr4	8522701	8522728	AATG	0.133882	4	0.535528	0.919354
chr10	97617322	97619587	Heart_Atrial_Appendage	MORN4	ENSG00000171160.17		chr10	97621124	97621155	ATTT	0.135132	4	0.540526	0.919354
chr3	72214782	72234148	Brain_Putamen_basal_ganglia	LINC00877	ENSG00000241163.7		chr3	72224021	72224066	GT	0.135699	4	0.542797	0.919354
chr5	38925371	38932463	Lung	OSMR	ENSG00000145623.12		chr5	38930921	38930964	GT	0.267697	2	0.535395	0.919354
chr4	185378207	185378644	Pituitary	LRP2BP	ENSG00000109771.15		chr4	185379813	185379834	CT	0.269868	2	0.539736	0.919354
chr12	111991889	112005257	Breast_Mammary_Tissue	TMEM116	ENSG00000198270.12		chr12	111985278	111985301	GT	0.27101	2	0.54202	0.919354
chr21	20743833	20757311	Brain_Hippocampus	LINC00320	ENSG00000224924.6		chr21	20741369	20741400	AAAC	0.271473	2	0.542945	0.919354
chr10	131259550	131260259	Thyroid	TCERG1L	ENSG00000176769.9		chr10	131269183	131269198	AAAC	0.533901	1	0.533901	0.919354
chr9	86414570	86452250	Testis	RP11-359J6.1	ENSG00000235819.1		chr9	86445045	86445064	AC	0.535731	1	0.535731	0.919354
chr5	135940680	135951223	Testis	LECT2	ENSG00000145826.8		chr5	135960328	135960347	AC	0.538424	1	0.538424	0.919354
chr5	135940680	135951223	Testis	GS1-39E22.1	ENSG00000253927.1		chr5	135960328	135960347	AC	0.538424	1	0.538424	0.919354
chr2	74959091	74959341	Small_Intestine_Terminal_Ileum	LINC01293	ENSG00000230836.1		chr2	74956935	74956978	GT	0.538468	1	0.538468	0.919354
chr13	111095894	111102698	Testis	LINC00368	ENSG00000225870.1		chr13	111109314	111109333	GTTTT	0.538588	1	0.538588	0.919354
chr14	103778821	103797371	Esophagus_Mucosa	PPP1R13B	ENSG00000088808.16		chr14	103792170	103792201	AC	0.538697	1	0.538697	0.919354
chr14	73645042	73654847	Testis	DNAL1	ENSG00000119661.14		chr14	73641212	73641229	GT	0.538971	1	0.538971	0.919354
chr1	22653303	22659440	Adipose_Subcutaneous	C1QB	ENSG00000173369.15		chr1	22643381	22643412	AC	0.540147	1	0.540147	0.919354
chr12	510567	535166	Nerve_Tibial	B4GALNT3	ENSG00000139044.10		chr12	515978	515991	AC	0.540377	1	0.540377	0.919354
chr11	83225778	83257833	Artery_Coronary	CCDC90B	ENSG00000137500.9		chr11	83248297	83248336	AC	0.541292	1	0.541292	0.919354
chr14	54865436	54902321	Whole_Blood	GCH1	ENSG00000131979.18		chr14	54905609	54905640	AG	0.541663	1	0.541663	0.919354
chr19	17508830	17516173	Testis	PGLS	ENSG00000130313.6		chr19	17508984	17509019	AAAT	0.542129	1	0.542129	0.919354
chr4	57427427	57434742	Testis	RP11-319E12.1	ENSG00000248505.1		chr4	57426898	57426931	GT	0.542982	1	0.542982	0.919354
chr3	55360715	55361719	Testis	RP11-875H7.2	ENSG00000242775.1		chr3	55370698	55370731	AC	0.544737	1	0.544737	0.920938
chr5	32077606	32087167	Nerve_Tibial	PDZD2	ENSG00000133401.15		chr5	32086664	32086687	GTT	0.544833	1	0.544833	0.920938
chr19	11298339	11301201	Testis	TSPAN16	ENSG00000130167.13		chr19	11297483	11297512	ATTTT	0.545118	1	0.545118	0.920938
chr6	152294127	152301869	Cells_Cultured_fibroblasts	SYNE1	ENSG00000131018.22		chr6	152303904	152303927	GT	0.090943	6	0.545658	0.921174
chr1	11980484	11981974	Thyroid	MFN2	ENSG00000116688.16		chr1	11988085	11988108	GT	0.1369	4	0.547599	0.923096
chr7	117170976	117189321	Testis	ST7	ENSG00000004866.20		chr7	117193151	117193182	AC	0.273749	2	0.547498	0.923096
chr17	80101625	80105749	Muscle_Skeletal	GAA	ENSG00000171298.12		chr17	80097901	80097950	AAAAG	0.274219	2	0.548438	0.923832
chr22	20498791	20500741	Thyroid	MED15	ENSG00000099917.17		chr22	20500390	20500407	CT	0.182973	3	0.548917	0.923964
chr8	23368434	23382391	Cells_Cultured_fibroblasts	LOXL2	ENSG00000134013.15		chr8	23388624	23388669	GT	0.550136	1	0.550136	0.925338
chr11	125463570	125469049	Esophagus_Gastroesophageal_Junction	FEZ1	ENSG00000149557.12		chr11	125475276	125475311	GT	0.0612396	9	0.551157	0.926378
chr15	58176940	58179128	Whole_Blood	AQP9	ENSG00000103569.9		chr15	58187423	58187464	AC	0.553478	1	0.553478	0.929601
chr21	43359486	43361485	Skin_Sun_Exposed_Lower_leg	LINC01679	ENSG00000237989.1		chr21	43359655	43359674	GT	0.553972	1	0.553972	0.929752
chr6	118285338	118314028	Testis	SLC35F1	ENSG00000196376.10		chr6	118291243	118291284	AC	0.554395	1	0.554395	0.929783
chr6	83607808	83610650	Pituitary	SNAP91	ENSG00000065609.14		chr6	83607330	83607365	NA	0.185386	3	0.556157	0.93206
chr7	75881486	75883734	Nerve_Tibial	RHBDD2	ENSG00000005486.16		chr7	75874319	75874350	GTTT	0.0397957	14	0.55714	0.932097
chr12	48108194	48118482	Testis	PFKM	ENSG00000152556.15		chr12	48106707	48106722	AAAC	0.556615	1	0.556615	0.932097
chr6	108965140	108988799	Testis	ARMC2	ENSG00000118690.12		chr6	108991229	108991254	AC	0.557395	1	0.557395	0.932097
chr5	173233501	173234750	Heart_Left_Ventricle	NKX2-5	ENSG00000183072.9		chr5	173224922	173224959	GT	0.558655	1	0.558655	0.932526
chr15	92699163	92733985	Thyroid	RP11-386M24.4	ENSG00000258741.3		chr15	92722313	92722332	AAAC	0.558867	1	0.558867	0.932526
chr15	92699163	92733985	Thyroid	CTD-2313J17.1	ENSG00000258922.1		chr15	92722313	92722332	AAAC	0.558867	1	0.558867	0.932526
chr10	14966606	14972513	Pituitary	MEIG1	ENSG00000197889.9		chr10	14965676	14965715	AG	0.140238	4	0.56095	0.934698
chr11	47375732	47379745	Skin_Sun_Exposed_Lower_leg	SPI1	ENSG00000066336.11		chr11	47380562	47380585	AAC	0.140448	4	0.561794	0.934698
chr10	71646617	71647619	Whole_Blood	CDH23	ENSG00000107736.19		chr10	71642096	71642116	AAT	0.561005	1	0.561005	0.934698
chr19	6921883	6924678	Whole_Blood	ADGRE1	ENSG00000174837.14		chr19	6922613	6922658	AC	0.561511	1	0.561511	0.934698
chr5	148124837	148125723	Skin_Sun_Exposed_Lower_leg	SPINK5	ENSG00000133710.15		chr5	148126572	148126607	ATTT	0.0437382	13	0.568597	0.935528
chr1	206012406	206013772	Stomach	CTSE	ENSG00000196188.10		chr1	206004870	206004889	GT	0.141543	4	0.566172	0.935528
chr1	231020126	231039921	Adipose_Visceral_Omentum	FAM89A	ENSG00000182118.7		chr1	231024521	231024550	GT	0.141808	4	0.567234	0.935528
chr11	118559864	118565790	Heart_Atrial_Appendage	IFT46	ENSG00000118096.7		chr11	118575412	118575437	GT	0.142094	4	0.568374	0.935528
chr16	11721670	11725797	Thyroid	TXNDC11	ENSG00000153066.12		chr16	11712930	11712957	GT	0.142159	4	0.568634	0.935528
chr12	7368197	7368933	Breast_Mammary_Tissue	CD163L1	ENSG00000177675.8		chr12	7368968	7368991	CT	0.188282	3	0.564845	0.935528
chr12	12612187	12635777	Adipose_Subcutaneous	CREBL2	ENSG00000111269.2		chr12	12643661	12643690	AGTCT	0.563694	1	0.563694	0.935528
chr2	197757400	197766532	Testis	BOLL	ENSG00000152430.17		chr2	197754751	197754786	AC	0.564565	1	0.564565	0.935528
chr10	119920984	119926036	Esophagus_Gastroesophageal_Junction	SEC23IP	ENSG00000107651.12		chr10	119918599	119918626	GTTT	0.565162	1	0.565162	0.935528
chr15	84905656	84908718	Liver	SLC28A1	ENSG00000156222.11		chr15	84904764	84904814	AAATTCTGATGTGTACT	0.566133	1	0.566133	0.935528
chr3	49240188	49241226	Testis	CCDC36	ENSG00000173421.16		chr3	49248418	49248442	AAAAC	0.566676	1	0.566676	0.935528
chr16	66758838	66767415	Testis	TERB1	ENSG00000249961.9		chr16	66771639	66771680	GT	0.566922	1	0.566922	0.935528
chr10	114575599	114601827	Esophagus_Muscularis	ABLIM1	ENSG00000099204.18		chr10	114584136	114584160	CTTTT	0.567105	1	0.567105	0.935528
chr22	26660816	26663316	Brain_Cortex	MIAT	ENSG00000225783.6		chr22	26665250	26665289	AAAG	0.567106	1	0.567106	0.935528
chr12	75486158	75499813	Skin_Sun_Exposed_Lower_leg	RP11-585P4.5	ENSG00000257497.2		chr12	75480332	75480355	AC	0.568038	1	0.568038	0.935528
chr20	22997248	22999587	Testis	RP4-753D10.5	ENSG00000230492.1		chr20	22997670	22997703	GT	0.568798	1	0.568798	0.935528
chr10	80176155	80180941	Esophagus_Gastroesophageal_Junction	ANXA11	ENSG00000122359.17		chr10	80178211	80178234	AG	0.0317511	18	0.571519	0.937324
chr7	155503105	155507020	Brain_Cerebellum	CNPY1	ENSG00000146910.12		chr7	155504690	155504727	GT	0.570657	1	0.570657	0.937324
chr20	31666086	31666991	Esophagus_Mucosa	BCL2L1	ENSG00000171552.12		chr20	31667485	31667514	AC	0.570923	1	0.570923	0.937324
chr1	54706537	54709946	Thyroid	MROH7	ENSG00000184313.19		chr1	54708418	54708441	AAAC	0.571213	1	0.571213	0.937324
chr6	157885061	157896827	Skin_Sun_Exposed_Lower_leg	SNX9	ENSG00000130340.15		chr6	157893609	157893632	GT	0.143019	4	0.572074	0.937566
chr2	182117301	182128974	Heart_Left_Ventricle	PPP1R1C	ENSG00000150722.10		chr2	182117693	182117712	GT	0.286301	2	0.572602	0.937763
chr19	48991483	48992995	Adipose_Subcutaneous	GYS1	ENSG00000104812.14		chr19	48996503	48996540	GT	0.575297	1	0.575297	0.941387
chr2	47051880	47060769	Testis	TTC7A	ENSG00000068724.15		chr2	47053544	47053583	GGTT	0.575633	1	0.575633	0.941387
chr4	82899737	82900077	Lung	THAP9-AS1	ENSG00000251022.6		chr4	82909423	82909440	GT	0.0360863	16	0.577381	0.942083
chr1	206637761	206647388	Thyroid	DYRK3	ENSG00000143479.15		chr1	206641446	206641459	NA	0.144378	4	0.577512	0.942083
chr17	16317908	16325800	Skin_Sun_Exposed_Lower_leg	PIGL	ENSG00000108474.16		chr17	16310287	16310324	GT	0.289376	2	0.578751	0.942083
chr15	51458795	51463379	Testis	DMXL2	ENSG00000104093.13		chr15	51458895	51458918	AGC	0.289507	2	0.579014	0.942083
chr20	25686122	25686391	Colon_Sigmoid	ZNF337	ENSG00000130684.13		chr20	25683230	25683268	ATC	0.578013	1	0.578013	0.942083
chr3	121993970	122001308	Thyroid	ILDR1	ENSG00000145103.12		chr3	122009325	122009364	GT	0.578327	1	0.578327	0.942083
chr17	45987095	45991460	Heart_Atrial_Appendage	MAPT	ENSG00000186868.15		chr17	45988887	45988910	AAAC	0.579257	1	0.579257	0.942083
chr7	926644	931330	Whole_Blood	ADAP1	ENSG00000105963.13		chr7	940331	940374	GT	0.579334	1	0.579334	0.942083
chr14	21500682	21500913	Skin_Sun_Exposed_Lower_leg	METTL3	ENSG00000165819.11		chr14	21493739	21493763	GTTTT	0.145503	4	0.58201	0.944432
chr7	150799177	150800298	Heart_Atrial_Appendage	TMEM176B	ENSG00000106565.17		chr7	150802077	150802101	CTCTT	0.290733	2	0.581465	0.944432
chr4	16033509	16038946	Testis	PROM1	ENSG00000007062.11		chr4	16027298	16027323	GT	0.581717	1	0.581717	0.944432
chr1	111500556	111503005	Adipose_Subcutaneous	TMIGD3	ENSG00000121933.18		chr1	111511675	111511698	GT	0.582501	1	0.582501	0.944562
chr15	57300924	57307542	Spleen	LINC00926	ENSG00000247982.6		chr15	57310852	57310897	GT	0.582924	1	0.582924	0.944583
chr1	20071635	20084821	Esophagus_Gastroesophageal_Junction	PLA2G5	ENSG00000127472.10		chr1	20069664	20069715	AAAG	0.0324794	18	0.58463	0.945658
chr2	36396787	36442615	Heart_Left_Ventricle	CRIM1	ENSG00000150938.9		chr2	36416210	36416233	AAT	0.584364	1	0.584364	0.945658
chr14	51350372	51365363	Skin_Not_Sun_Exposed_Suprapubic	LINC00640	ENSG00000258479.5		chr14	51369271	51369290	AAAC	0.584844	1	0.584844	0.945658
chr11	3361889	3370975	Stomach	ZNF195	ENSG00000005801.16		chr11	3368078	3368097	GTTT	0.585443	1	0.585443	0.945658
chr4	155352354	155354209	Testis	AC097467.2	ENSG00000250910.7		chr4	155359211	155359246	AC	0.585642	1	0.585642	0.945658
chr20	44885886	44901531	Stomach	YWHAB	ENSG00000166913.12		chr20	44911136	44911179	AAAT	0.0183468	32	0.587098	0.947343
chr6	11461467	11480954	Testis	RP11-716O23.1	ENSG00000233656.1		chr6	11479705	11479724	AAAT	0.588442	1	0.588442	0.948182
chr6	11461467	11480954	Testis	RP11-716O23.2	ENSG00000242753.1		chr6	11479705	11479724	AAAT	0.588442	1	0.588442	0.948182
chr15	75349339	75351301	Breast_Mammary_Tissue	NEIL1	ENSG00000140398.13		chr15	75353225	75353250	AC	0.0151791	39	0.591984	0.950025
chr19	56147208	56158494	Breast_Mammary_Tissue	ZNF444	ENSG00000167685.14		chr19	56162821	56162856	AC	0.0844798	7	0.591358	0.950025
chr12	52601681	52602816	Skin_Not_Sun_Exposed_Suprapubic	KRT73	ENSG00000186049.8		chr12	52610065	52610088	GTTT	0.590601	1	0.590601	0.950025
chr2	205301701	205344998	Testis	PARD3B	ENSG00000116117.17		chr2	205309897	205309928	ATCT	0.590923	1	0.590923	0.950025
chr1	172465363	172468449	Heart_Atrial_Appendage	C1orf105	ENSG00000180999.10		chr1	172476581	172476600	GT	0.592062	1	0.592062	0.950025
chr9	505319	506282	Testis	KANK1	ENSG00000107104.18		chr9	512231	512250	GT	0.592888	1	0.592888	0.950025
chr9	505319	506282	Testis	RP11-31F19.1	ENSG00000226403.1		chr9	512231	512250	GT	0.592888	1	0.592888	0.950025
chr9	505319	506282	Testis	RP11-165F24.5	ENSG00000228115.1		chr9	512231	512250	GT	0.592888	1	0.592888	0.950025
chr2	226982270	227008018	Adrenal_Gland	COL4A4	ENSG00000081052.11		chr2	226974226	226974250	ATTTT	0.0594016	10	0.594016	0.951169
chr16	87726924	87748673	Heart_Atrial_Appendage	KLHDC4	ENSG00000104731.13		chr16	87738358	87738379	GT	0.0205407	29	0.595681	0.951394
chr2	158807115	158826396	Skin_Not_Sun_Exposed_Suprapubic	DAPL1	ENSG00000163331.11		chr2	158816562	158816601	AC	0.0851222	7	0.595855	0.951394
chr16	19367877	19393376	Minor_Salivary_Gland	CTA-363E6.2	ENSG00000259925.1		chr16	19381243	19381257	ATTTT	0.297565	2	0.595131	0.951394
chr11	60429827	60430899	Testis	MS4A5	ENSG00000166930.6		chr11	60422467	60422490	GT	0.595186	1	0.595186	0.951394
chr7	37849056	37850260	Testis	NME8	ENSG00000086288.11		chr7	37839623	37839642	CT	0.596317	1	0.596317	0.951394
chr12	68019898	68026651	Cells_EBV-transformed_lymphocytes	IFNG-AS1	ENSG00000255733.5		chr12	68030192	68030221	AC	0.59679	1	0.59679	0.951394
chr7	116433358	116458851	Nerve_Tibial	AC002066.1	ENSG00000237813.3		chr7	116432742	116432767	AC	0.597051	1	0.597051	0.951394
chr4	99085216	99088689	Lung	ADH5	ENSG00000197894.10		chr4	99090446	99090473	AAAT	0.298944	2	0.597888	0.952069
chr13	102873343	102875307	Nerve_Tibial	ERCC5	ENSG00000134899.18		chr13	102864127	102864166	AC	0.0545015	11	0.599516	0.952614
chr4	47536938	47546624	Adipose_Subcutaneous	ATP10D	ENSG00000145246.13		chr4	47543837	47543852	AC	0.100957	6	0.605741	0.952614
chr2	134502997	134550570	Pancreas	TMEM163	ENSG00000152128.13		chr2	134507337	134507376	ATTT	0.120082	5	0.60041	0.952614
chr5	140677753	140679002	Muscle_Skeletal	HARS	ENSG00000170445.12		chr5	140688104	140688143	GTTTT	0.202044	3	0.606131	0.952614
chr17	2407230	2414395	Thyroid	MNT	ENSG00000070444.14		chr17	2418198	2418223	GT	0.301191	2	0.602382	0.952614
chr17	2407230	2414395	Thyroid	METTL16	ENSG00000127804.12		chr17	2418198	2418223	GT	0.301191	2	0.602382	0.952614
chr4	4387758	4391475	Skin_Not_Sun_Exposed_Suprapubic	NSG1	ENSG00000168824.14		chr4	4397040	4397059	GT	0.303076	2	0.606153	0.952614
chr11	86922098	86954801	Adipose_Subcutaneous	FZD4	ENSG00000174804.3		chr11	86925296	86925331	GT	0.599662	1	0.599662	0.952614
chr6	68227292	68266500	Testis	RP11-406O16.1	ENSG00000226497.1		chr6	68225545	68225564	AAAC	0.600625	1	0.600625	0.952614
chr1	41376105	41378977	Thyroid	RP11-399E6.4	ENSG00000229901.1		chr1	41379100	41379134	AAAAC	0.600902	1	0.600902	0.952614
chr12	24818049	24829823	Testis	BCAT1	ENSG00000060982.14		chr12	24823219	24823246	AAAC	0.601238	1	0.601238	0.952614
chr11	127048120	127053338	Testis	RP11-168K9.1	ENSG00000255546.1		chr11	127045306	127045335	AC	0.601645	1	0.601645	0.952614
chr12	4634319	4638101	Testis	AKAP3	ENSG00000111254.7		chr12	4625693	4625716	CT	0.602702	1	0.602702	0.952614
chr3	147043740	147156465	Brain_Cerebellum	RP11-649A16.1	ENSG00000243620.1		chr3	147139670	147139691	AC	0.603051	1	0.603051	0.952614
chr18	12408219	12420325	Nerve_Tibial	PRELID3A	ENSG00000141391.13		chr18	12407249	12407283	GTTTT	0.603618	1	0.603618	0.952614
chr2	53836215	53838233	Testis	PSME4	ENSG00000068878.14		chr2	53843855	53843886	AAGG	0.604637	1	0.604637	0.952614
chr17	19480391	19481652	Testis	AC004448.5	ENSG00000235979.8		chr17	19472241	19472270	NA	0.605516	1	0.605516	0.952614
chr16	58516343	58518401	Testis	SETD6	ENSG00000103037.11		chr16	58513169	58513196	GT	0.606128	1	0.606128	0.952614
chr11	1459239	1460548	Nerve_Tibial	BRSK2	ENSG00000174672.15		chr11	1466269	1466284	AC	0.606131	1	0.606131	0.952614
chr11	110430305	110435834	Whole_Blood	FDX1	ENSG00000137714.2		chr11	110431102	110431137	AGC	0.60651	1	0.60651	0.952614
chr21	37069624	37072145	Esophagus_Mucosa	PIGP	ENSG00000185808.13		chr21	37066972	37067015	AC	0.607474	1	0.607474	0.953478
chr17	826078	864015	Testis	NXN	ENSG00000167693.16		chr17	836964	836990	AAT	0.608485	1	0.608485	0.954413
chr1	56989489	56990358	Liver	RP5-1103B4.3	ENSG00000236341.1		chr1	56994167	56994186	GT	0.6095	1	0.6095	0.955353
chr13	75845379	75848085	Heart_Atrial_Appendage	LMO7	ENSG00000136153.19		chr13	75848432	75848467	ATCT	0.305314	2	0.610629	0.956472
chr15	75358618	75358704	Esophagus_Muscularis	MAN2C1	ENSG00000140400.16		chr15	75353225	75353250	AC	0.0138979	44	0.611507	0.957195
chr7	142877504	142877651	Skin_Sun_Exposed_Lower_leg	TRPV6	ENSG00000165125.19		chr7	142878680	142878711	ATTC	0.15349	4	0.613961	0.958746
chr12	933076	949602	Heart_Atrial_Appendage	RP11-359B12.2	ENSG00000250132.6		chr12	939053	939084	AC	0.153517	4	0.61407	0.958746
chr10	73498867	73499595	Thyroid	PPP3CB-AS1	ENSG00000221817.9		chr10	73491970	73491997	ATTT	0.30656	2	0.613119	0.958746
chr10	27219857	27223338	Muscle_Skeletal	ACBD5	ENSG00000107897.18		chr10	27226450	27226487	GT	0.614164	1	0.614164	0.958746
chr8	22621568	22623915	Thyroid	BIN3	ENSG00000147439.12		chr8	22619566	22619586	AGTCCGC	0.102848	6	0.617087	0.961011
chr9	91775818	91949867	Esophagus_Mucosa	ROR2	ENSG00000169071.14		chr9	91839252	91839295	AC	0.616166	1	0.616166	0.961011
chr17	46830918	46831448	Skin_Not_Sun_Exposed_Suprapubic	WNT3	ENSG00000108379.9		chr17	46836096	46836135	GT	0.617099	1	0.617099	0.961011
chr12	26983596	26990450	Nerve_Tibial	TM7SF3	ENSG00000064115.10		chr12	26988673	26988708	AC	0.617285	1	0.617285	0.961011
chr22	18029554	18036047	Muscle_Skeletal	LINC01634	ENSG00000235295.1		chr22	18030133	18030160	GT	0.618752	1	0.618752	0.962642
chr1	105988507	106023082	Testis	LINC01677	ENSG00000233047.6		chr1	106024610	106024645	ATCT	0.619384	1	0.619384	0.962974
chr9	16388982	16415289	Testis	RP11-183I6.2	ENSG00000231756.1		chr9	16418874	16418899	GT	0.619977	1	0.619977	0.963246
chr1	32987319	33031056	Testis	RP1-117O3.2	ENSG00000236065.2		chr1	33023402	33023434	GTT	0.620835	1	0.620835	0.963313
chr22	42695631	42721165	Nerve_Tibial	A4GALT	ENSG00000128274.15		chr22	42724547	42724567	AAT	0.620857	1	0.620857	0.963313
chr9	977455	990041	Testis	DMRT3	ENSG00000064218.4		chr9	987413	987456	GT	0.622338	1	0.622338	0.964959
chr6	30127648	30145994	Testis	TRIM40	ENSG00000204614.8		chr6	30138067	30138090	AC	0.624006	1	0.624006	0.966895
chr11	78101195	78103980	Minor_Salivary_Gland	ALG8	ENSG00000159063.12		chr11	78095235	78095266	AC	0.0132308	48	0.635076	0.967422
chr17	41771862	41786566	Artery_Coronary	JUP	ENSG00000173801.16		chr17	41789421	41789456	AC	0.0203746	31	0.631612	0.967422
chr19	58246794	58277183	Adipose_Subcutaneous	ZNF544	ENSG00000198131.13		chr19	58241922	58241943	CT	0.0213699	30	0.641098	0.967422
chr14	92704361	92709672	Pituitary	LGMN	ENSG00000100600.14		chr14	92703057	92703100	AC	0.0330771	19	0.628466	0.967422
chr22	26672987	26717253	Whole_Blood	MIATNB	ENSG00000244625.5		chr22	26665250	26665289	AAAG	0.0489523	13	0.63638	0.967422
chr12	64684894	64691470	Adipose_Subcutaneous	RASSF3	ENSG00000153179.12		chr12	64689221	64689246	GT	0.0571214	11	0.628336	0.967422
chr20	62806481	62807537	Testis	OGFR	ENSG00000060491.16		chr20	62805393	62805428	CTGGGG	0.078197	8	0.625576	0.967422
chr11	129852660	129854610	Skin_Sun_Exposed_Lower_leg	TMEM45B	ENSG00000151715.7		chr11	129863611	129863642	AAAC	0.126971	5	0.634853	0.967422
chr15	72320702	72345446	Pancreas	HEXA	ENSG00000213614.9		chr15	72340842	72340873	AC	0.127401	5	0.637004	0.967422
chr9	132828726	132854857	Thyroid	AK8	ENSG00000165695.9		chr9	132846505	132846552	ATTC	0.128222	5	0.641111	0.967422
chr3	170460412	170476771	Nerve_Tibial	CLDN11	ENSG00000013297.10		chr3	170471091	170471120	GT	0.158758	4	0.635034	0.967422
chr8	118928929	118932931	Adipose_Subcutaneous	TNFRSF11B	ENSG00000164761.8		chr8	118928013	118928044	AC	0.212451	3	0.637353	0.967422
chr12	132620347	132620445	Esophagus_Gastroesophageal_Junction	P2RX2	ENSG00000187848.12		chr12	132628645	132628689	GTTTT	0.313527	2	0.627054	0.967422
chr5	14769191	14871352	Artery_Aorta	ANKH	ENSG00000154122.12		chr5	14783290	14783331	GT	0.316045	2	0.63209	0.967422
chr16	31372670	31376799	Whole_Blood	ITGAX	ENSG00000140678.16		chr16	31373102	31373131	AAG	0.316706	2	0.633412	0.967422
chr2	218390279	218391198	Whole_Blood	SLC11A1	ENSG00000018280.16		chr2	218389105	218389131	AAT	0.318095	2	0.636191	0.967422
chr9	125585727	125650364	Cells_Cultured_fibroblasts	MAPKAP1	ENSG00000119487.16		chr9	125629055	125629092	GT	0.319185	2	0.638371	0.967422
chr6	133537358	133568190	Lung	TARID	ENSG00000227954.6		chr6	133574275	133574318	GT	0.320229	2	0.640458	0.967422
chr11	105139078	105139720	Skin_Sun_Exposed_Lower_leg	CARD18	ENSG00000255501.1		chr11	105135039	105135058	GTTT	0.3203	2	0.6406	0.967422
chr17	29534300	29542561	Testis	TAOK1	ENSG00000160551.11		chr17	29534929	29534964	GT	0.625471	1	0.625471	0.967422
chr6	24653153	24654412	Whole_Blood	TDP2	ENSG00000111802.13		chr6	24645841	24645888	GT	0.625848	1	0.625848	0.967422
chr2	176178253	176178425	Testis	HAGLROS	ENSG00000226363.3		chr2	176168567	176168586	AAAAC	0.626564	1	0.626564	0.967422
chr4	48987072	48988477	Skin_Sun_Exposed_Lower_leg	CWH43	ENSG00000109182.11		chr4	48996299	48996330	AC	0.629126	1	0.629126	0.967422
chr5	175516663	175526638	Cells_EBV-transformed_lymphocytes	SFXN1	ENSG00000164466.12		chr5	175511842	175511863	CT	0.629758	1	0.629758	0.967422
chr2	178263647	178284927	Muscle_Skeletal	OSBPL6	ENSG00000079156.16		chr2	178259475	178259489	ATTTC	0.630639	1	0.630639	0.967422
chr15	58865302	58868493	Testis	RNF111	ENSG00000157450.15		chr15	58868457	58868486	GTTTT	0.632608	1	0.632608	0.967422
chr17	47254379	47274419	Artery_Tibial	ITGB3	ENSG00000259207.7		chr17	47251978	47252011	AC	0.633979	1	0.633979	0.967422
chr16	87726924	87748673	Testis	RP11-278A23.2	ENSG00000260671.2		chr16	87738358	87738379	GT	0.634247	1	0.634247	0.967422
chr1	43357900	43358801	Testis	RP1-92O14.3	ENSG00000234694.1		chr1	43351011	43351050	AAAAC	0.634484	1	0.634484	0.967422
chr11	63302404	63304108	Liver	SLC22A10	ENSG00000184999.11		chr11	63299710	63299739	GT	0.635166	1	0.635166	0.967422
chr16	1092184	1093497	Artery_Aorta	C1QTNF8	ENSG00000184471.7		chr16	1093457	1093468	NA	0.635232	1	0.635232	0.967422
chr7	102854860	102877467	Stomach	FBXL13	ENSG00000161040.16		chr7	102882763	102882792	NA	0.635377	1	0.635377	0.967422
chr18	69757873	69841244	Testis	DOK6	ENSG00000206052.10		chr18	69779454	69779477	AC	0.635723	1	0.635723	0.967422
chr17	82411530	82415406	Stomach	OGFOD3	ENSG00000181396.12		chr17	82409908	82409929	CT	0.635726	1	0.635726	0.967422
chr3	186790255	186791725	Testis	RFC4	ENSG00000163918.10		chr3	186796027	186796054	GT	0.63738	1	0.63738	0.967422
chr5	113323273	113399943	Testis	CTD-2201G3.1	ENSG00000232633.4		chr5	113331615	113331649	GTTTT	0.639217	1	0.639217	0.967422
chr2	60396816	60400433	Heart_Atrial_Appendage	MIR4432HG	ENSG00000223929.1		chr2	60392647	60392672	CT	0.639435	1	0.639435	0.967422
chr2	60396816	60400433	Heart_Atrial_Appendage	AC007381.3	ENSG00000228590.1		chr2	60392647	60392672	CT	0.639435	1	0.639435	0.967422
chr10	102504334	102509169	Testis	SUFU	ENSG00000107882.11		chr10	102500569	102500604	GTTT	0.639724	1	0.639724	0.967422
chr12	132624994	132625252	Testis	POLE	ENSG00000177084.16		chr12	132628645	132628689	GTTTT	0.641164	1	0.641164	0.967422
chr11	118999109	119010764	Whole_Blood	CCDC84	ENSG00000186166.8		chr11	119018676	119018699	AGG	0.0458292	14	0.641609	0.967459
chr19	1952035	1969508	Testis	CSNK1G2	ENSG00000133275.15		chr19	1955299	1955319	CTG	0.643147	1	0.643147	0.968618
chr12	71615316	71623360	Lung	ZFC3H1	ENSG00000133858.15		chr12	71629557	71629592	GT	0.643219	1	0.643219	0.968618
chr10	49751981	49752133	Brain_Cerebellum	OGDHL	ENSG00000197444.9		chr10	49748743	49748784	GT	0.64462	1	0.64462	0.970092
chr6	169457634	169572419	Ovary	WDR27	ENSG00000184465.15		chr6	169533824	169533849	AC	0.215993	3	0.64798	0.973875
chr15	100380827	100408567	Artery_Aorta	CERS3-AS1	ENSG00000259430.1		chr15	100413511	100413560	ACTAT	0.323882	2	0.647764	0.973875
chr12	46387972	46470153	Muscle_Skeletal	RP11-96H19.1	ENSG00000257261.5		chr12	46389435	46389464	AC	0.324839	2	0.649678	0.974368
chr11	114185402	114186952	Muscle_Skeletal	ZBTB16	ENSG00000109906.13		chr11	114190731	114190758	AC	0.32484	2	0.64968	0.974368
chr20	48681335	48688657	Colon_Transverse	PREX1	ENSG00000124126.13		chr20	48693189	48693224	ATGG	0.648837	1	0.648837	0.974368
chr16	56633405	56633751	Adipose_Visceral_Omentum	MT1M	ENSG00000205364.3		chr16	56631017	56631036	GT	0.650002	1	0.650002	0.974368
chr16	57440983	57447342	Muscle_Skeletal	CIAPIN1	ENSG00000005194.14		chr16	57433524	57433543	AC	0.325613	2	0.651227	0.975568
chr2	237518648	237519910	Cells_Cultured_fibroblasts	MLPH	ENSG00000115648.13		chr2	237510901	237510924	GT	0.326079	2	0.652159	0.976329
chr1	220881373	220882164	Colon_Sigmoid	HLX	ENSG00000136630.12		chr1	220881764	220881813	AC	0.652936	1	0.652936	0.976857
chr17	48915982	48916076	Thyroid	UBE2Z	ENSG00000159202.17		chr17	48916588	48916612	GTTTT	0.217873	3	0.65362	0.977244
chr10	119104197	119107948	Colon_Sigmoid	FAM45A	ENSG00000119979.16		chr10	119114265	119114290	AC	0.0818206	8	0.654565	0.978022
chr19	46312267	46312506	Nerve_Tibial	HIF3A	ENSG00000124440.15		chr19	46312713	46312736	GT	0.109166	6	0.654997	0.978032
chr3	101399055	101458955	Cells_Cultured_fibroblasts	SENP7	ENSG00000138468.15		chr3	101456942	101456981	AAAAC	0.65552	1	0.65552	0.978178
chr5	42629103	42688890	Stomach	GHR	ENSG00000112964.13		chr5	42634522	42634543	AC	0.0219233	30	0.657699	0.978439
chr17	15440285	15545785	Cells_Cultured_fibroblasts	TVP23C	ENSG00000175106.16		chr17	15519482	15519507	GT	0.21911	3	0.657331	0.978439
chr17	15440285	15545785	Cells_Cultured_fibroblasts	CDRT4	ENSG00000239704.10		chr17	15519482	15519507	GT	0.21911	3	0.657331	0.978439
chr20	31640097	31644768	Thyroid	COX4I2	ENSG00000131055.4		chr20	31651963	31652001	GTT	0.219274	3	0.657821	0.978439
chr11	77245502	77258386	Testis	GDPD4	ENSG00000178795.9		chr11	77243518	77243541	CCCT	0.65721	1	0.65721	0.978439
chr7	30568989	30573000	Brain_Hippocampus	AC005154.6	ENSG00000196295.11		chr7	30569341	30569370	AC	0.0137159	48	0.658365	0.978616
chr15	44736710	44759640	Cells_EBV-transformed_lymphocytes	TRIM69	ENSG00000185880.12		chr15	44746751	44746778	AC	0.329483	2	0.658967	0.978879
chr3	119491574	119492282	Cells_Cultured_fibroblasts	POGLUT1	ENSG00000163389.10		chr3	119492058	119492081	AAAT	0.0264494	25	0.661236	0.97947
chr18	63887770	63891436	Skin_Not_Sun_Exposed_Suprapubic	SERPINB2	ENSG00000197632.8		chr18	63878372	63878399	AACC	0.329902	2	0.659803	0.97947
chr12	31709425	31714882	Artery_Tibial	AMN1	ENSG00000151743.10		chr12	31722131	31722176	GT	0.33139	2	0.66278	0.97947
chr1	156284406	156291385	Skin_Sun_Exposed_Lower_leg	TMEM79	ENSG00000163472.18		chr1	156292377	156292422	GT	0.331657	2	0.663314	0.97947
chr10	117473422	117492021	Skin_Sun_Exposed_Lower_leg	EMX2OS	ENSG00000229847.8		chr10	117464568	117464581	AT	0.661977	1	0.661977	0.97947
chr4	154207053	154298253	Cells_Cultured_fibroblasts	RP11-290O12.2	ENSG00000280241.3		chr4	154304633	154304664	GTTT	0.662201	1	0.662201	0.97947
chr17	7350999	7351141	Whole_Blood	ACAP1	ENSG00000072818.11		chr17	7354529	7354556	GT	0.662474	1	0.662474	0.97947
chr5	139683153	139683386	Testis	CTB-35F21.1	ENSG00000249526.1		chr5	139682325	139682354	AGCCCC	0.662755	1	0.662755	0.97947
chr3	172506919	172514861	Adipose_Visceral_Omentum	TNFSF10	ENSG00000121858.10		chr3	172498817	172498852	AAAC	0.663601	1	0.663601	0.97947
chr20	32634093	32640566	Brain_Cerebellar_Hemisphere	C20orf203	ENSG00000198547.8		chr20	32643626	32643673	GT	0.663622	1	0.663622	0.97947
chr13	46051989	46052404	Cells_Cultured_fibroblasts	ZC3H13	ENSG00000123200.16		chr13	46059578	46059619	ATC	0.664048	1	0.664048	0.979471
chr10	133391428	133391583	Testis	MTG1	ENSG00000148824.18		chr10	133390411	133390446	AC	0.665175	1	0.665175	0.97997
chr10	17216274	17229345	Thyroid	VIM-AS1	ENSG00000229124.6		chr10	17212130	17212159	GTTTT	0.665238	1	0.665238	0.97997
chr1	240493476	240611884	Muscle_Skeletal	GREM2	ENSG00000180875.4		chr1	240537786	240537805	GTTT	0.666219	1	0.666219	0.980447
chr15	77735053	77795939	Testis	LINGO1	ENSG00000169783.12		chr15	77782213	77782246	GT	0.666414	1	0.666414	0.980447
chr9	15848947	15874532	Uterus	CCDC171	ENSG00000164989.16		chr9	15877180	15877203	AAAC	0.333716	2	0.667432	0.981318
chr8	28338788	28339040	Spleen	PNOC	ENSG00000168081.8		chr8	28334050	28334089	AC	0.669565	1	0.669565	0.983824
chr2	676238	677289	Testis	AC092159.2	ENSG00000233296.1		chr2	681562	681593	GT	0.671045	1	0.671045	0.98537
chr10	120880901	120883780	Pituitary	WDR11	ENSG00000120008.15		chr10	120889239	120889253	GTTTT	0.0210044	32	0.67214	0.986068
chr12	126732407	126746261	Spleen	LINC00944	ENSG00000256128.5		chr12	126731886	126731929	GT	0.224269	3	0.672806	0.986068
chr7	70698620	70762870	Skin_Sun_Exposed_Lower_leg	AUTS2	ENSG00000158321.15		chr7	70715508	70715542	CTTTT	0.672595	1	0.672595	0.986068
chr14	64357503	64361110	Testis	TEX21P	ENSG00000234911.1		chr14	64365480	64365499	AAAC	0.673678	1	0.673678	0.98609
chr14	64357503	64361110	Testis	CTD-2555O16.1	ENSG00000258809.1		chr14	64365480	64365499	AAAC	0.673678	1	0.673678	0.98609
chr8	126589290	126617389	Testis	RP11-89K10.1	ENSG00000254286.5		chr8	126596337	126596360	AG	0.675176	1	0.675176	0.987654
chr14	83903691	83913948	Testis	RP11-353P15.1	ENSG00000258532.1		chr14	83901217	83901258	GT	0.675737	1	0.675737	0.987847
chr11	1919762	1922857	Skin_Not_Sun_Exposed_Suprapubic	TNNT3	ENSG00000130595.17		chr11	1914583	1914608	GT	0.676405	1	0.676405	0.988005
chr14	59079776	59094555	Testis	LINC01500	ENSG00000258583.5		chr14	59089575	59089586	ATTC	0.676979	1	0.676979	0.988005
chr6	33200938	33201242	Cells_Cultured_fibroblasts	SLC39A7	ENSG00000112473.17		chr6	33205972	33205997	AG	0.677133	1	0.677133	0.988005
chr8	23005475	23005960	Brain_Caudate_basal_ganglia	RHOBTB2	ENSG00000008853.16		chr8	23009171	23009184	AG	0.169565	4	0.67826	0.988719
chr19	17102557	17103257	Cells_EBV-transformed_lymphocytes	MYO9B	ENSG00000099331.13		chr19	17094016	17094051	GTT	0.169621	4	0.678482	0.988719
chr2	85577649	85581576	Minor_Salivary_Gland	VAMP5	ENSG00000168899.4		chr2	85586581	85586600	AAAC	0.135931	5	0.679656	0.988881
chr12	53666752	53669148	Brain_Spinal_cord_cervical_c-1	ATP5G2	ENSG00000135390.17		chr12	53660855	53660869	GTT	0.679471	1	0.679471	0.988881
chr19	897540	899601	Artery_Tibial	R3HDM4	ENSG00000198858.9		chr19	906810	906834	AAAAC	0.679882	1	0.679882	0.988881
chr9	6720997	6723527	Testis	RP11-390F4.3	ENSG00000225489.6		chr9	6725324	6725339	GT	0.340201	2	0.680403	0.989013
chr14	24292330	24296509	Nerve_Tibial	DHRS1	ENSG00000157379.13		chr14	24300644	24300667	AGG	0.0378881	18	0.681985	0.989024
chr13	21301618	21330723	Lung	MIPEPP3	ENSG00000233325.3		chr13	21314473	21314508	AC	0.0425802	16	0.681284	0.989024
chr17	44304207	44307292	Testis	RUNDC3A-AS1	ENSG00000267750.5		chr17	44306896	44306922	GTT	0.0426753	16	0.682805	0.989024
chr5	172986760	172994775	Lung	ATP6V0E1	ENSG00000113732.8		chr5	172986778	172986801	GTTT	0.0620295	11	0.682325	0.989024
chr17	2007137	2014150	Testis	CTD-2545H1.1	ENSG00000262869.1		chr17	2010730	2010757	GTTT	0.682262	1	0.682262	0.989024
chr18	13484119	13491232	Testis	LDLRAD4	ENSG00000168675.18		chr18	13479628	13479647	AAAAG	0.682989	1	0.682989	0.989024
chr3	45596287	45636150	Minor_Salivary_Gland	LIMD1	ENSG00000144791.9		chr3	45612071	45612100	CT	0.0490134	14	0.686188	0.990052
chr19	35507511	35508205	Nerve_Tibial	DMKN	ENSG00000161249.20		chr19	35514957	35514983	ATT	0.0490575	14	0.686804	0.990052
chr10	14530515	14604240	Breast_Mammary_Tissue	FAM107B	ENSG00000065809.13		chr10	14570234	14570269	AC	0.0765782	9	0.689204	0.990052
chr4	67701484	67720422	Artery_Tibial	UBA6-AS1	ENSG00000248049.6		chr4	67704504	67704545	NA	0.0978724	7	0.685107	0.990052
chr5	149619042	149621733	Minor_Salivary_Gland	ARHGEF37	ENSG00000183111.11		chr5	149629216	149629247	ATTC	0.0978752	7	0.685126	0.990052
chr9	100298010	100300568	Adipose_Visceral_Omentum	INVS	ENSG00000119509.12		chr9	100301140	100301179	AC	0.172694	4	0.690777	0.990052
chr16	50308411	50309548	Cells_Cultured_fibroblasts	ADCY7	ENSG00000121281.12		chr16	50317895	50317918	GTTT	0.346152	2	0.692305	0.990052
chr10	1233845	1242131	Testis	ADARB2	ENSG00000185736.15		chr10	1229846	1229867	AC	0.68749	1	0.68749	0.990052
chr8	30502959	30504286	Testis	RBPMS	ENSG00000157110.15		chr8	30499871	30499906	GT	0.688209	1	0.688209	0.990052
chr6	116371121	116399198	Testis	DSE	ENSG00000111817.16		chr6	116382038	116382071	GT	0.688283	1	0.688283	0.990052
chr6	116371121	116399198	Testis	RP1-93H18.1	ENSG00000240050.5		chr6	116382038	116382071	GT	0.688283	1	0.688283	0.990052
chr3	111732703	111845821	Pancreas	PLCXD2	ENSG00000240891.7		chr3	111751169	111751206	GT	0.69013	1	0.69013	0.990052
chr13	19186287	19187120	Testis	RP11-408E5.4	ENSG00000121388.5		chr13	19186698	19186733	GT	0.69024	1	0.69024	0.990052
chr14	76959753	76960144	Heart_Atrial_Appendage	LINC01629	ENSG00000258602.1		chr14	76955217	76955244	GTTT	0.690753	1	0.690753	0.990052
chr3	157470529	157487375	Cells_Cultured_fibroblasts	VEPH1	ENSG00000197415.11		chr3	157483124	157483153	GT	0.691045	1	0.691045	0.990052
chr19	17305957	17314023	Testis	DDA1	ENSG00000130311.10		chr19	17301777	17301808	GT	0.691435	1	0.691435	0.990052
chr19	17305957	17314023	Testis	MRPL34	ENSG00000130312.6		chr19	17301777	17301808	GT	0.691435	1	0.691435	0.990052
chr17	3881648	3882528	Nerve_Tibial	CAMKK1	ENSG00000004660.14		chr17	3888914	3888935	AC	0.691562	1	0.691562	0.990052
chr16	81054094	81084463	Heart_Left_Ventricle	GCSH	ENSG00000140905.10		chr16	81065818	81065852	AAAAC	0.692008	1	0.692008	0.990052
chr16	81054094	81084463	Heart_Left_Ventricle	C16orf46	ENSG00000166455.13		chr16	81065818	81065852	AAAAC	0.692008	1	0.692008	0.990052
chr8	3369370	3372412	Testis	CSMD1	ENSG00000183117.18		chr8	3363513	3363536	AAAT	0.693844	1	0.693844	0.990411
chr8	3369370	3372412	Testis	RP11-279L11.1	ENSG00000253162.1		chr8	3363513	3363536	AAAT	0.693844	1	0.693844	0.990411
chr6	109467734	109475399	Testis	ZBTB24	ENSG00000112365.4		chr6	109460524	109460551	GT	0.693848	1	0.693848	0.990411
chr14	60059116	60062011	Testis	LRRC9	ENSG00000131951.10		chr14	60053384	60053421	AC	0.695115	1	0.695115	0.991605
chr3	72061094	72099904	Whole_Blood	RP11-398A8.5	ENSG00000276471.1		chr3	72083030	72083053	AG	0.348137	2	0.696273	0.991874
chr11	11968487	11998696	Heart_Left_Ventricle	DKK3	ENSG00000050165.17		chr11	12000181	12000216	AAAC	0.696073	1	0.696073	0.991874
chr2	210455314	210471959	Testis	LANCL1	ENSG00000115365.11		chr2	210454220	210454261	AC	0.696597	1	0.696597	0.991874
chr11	31463305	31509519	Muscle_Skeletal	IMMP1L	ENSG00000148950.9		chr11	31499367	31499391	GTTTT	0.0498475	14	0.697865	0.991928
chr5	179569217	179569302	Whole_Blood	RUFY1	ENSG00000176783.14		chr5	179561213	179561232	AAAT	0.697192	1	0.697192	0.991928
chr14	62075391	62079340	Testis	SYT16	ENSG00000139973.16		chr14	62068366	62068405	AAAAC	0.697928	1	0.697928	0.991928
chr4	123496944	123499740	Testis	RP11-381N20.2	ENSG00000249125.1		chr4	123488594	123488623	AC	0.698859	1	0.698859	0.992026
chr4	123496944	123499740	Testis	RP11-381N20.1	ENSG00000251526.1		chr4	123488594	123488623	AC	0.698859	1	0.698859	0.992026
chr7	55965150	55978126	Muscle_Skeletal	GBAS	ENSG00000146729.9		chr7	55976040	55976071	GT	0.0437698	16	0.700316	0.99287
chr2	151282954	151289593	Cells_Cultured_fibroblasts	NMI	ENSG00000123609.10		chr2	151291981	151292000	GT	0.700208	1	0.700208	0.99287
chr12	105367509	105395632	Artery_Aorta	C12orf75	ENSG00000235162.8		chr12	105387739	105387758	GT	0.350819	2	0.701637	0.99413
chr19	9324780	9341102	Cells_EBV-transformed_lymphocytes	ZNF559	ENSG00000188321.13		chr19	9332356	9332369	AT	0.0542029	13	0.704637	0.994214
chr10	59684327	59709479	Thyroid	SLC16A9	ENSG00000165449.11		chr10	59677064	59677079	GT	0.141031	5	0.705152	0.994214
chr19	614016	615795	Testis	HCN2	ENSG00000099822.2		chr19	612394	612427	GT	0.352348	2	0.704695	0.994214
chr4	76074819	76075881	Esophagus_Gastroesophageal_Junction	ART3	ENSG00000156219.16		chr4	76065553	76065578	AC	0.352577	2	0.705153	0.994214
chr1	2604281	2605558	Testis	MMEL1	ENSG00000142606.15		chr1	2609035	2609080	GT	0.703238	1	0.703238	0.994214
chr6	162443473	162727662	Testis	PARK2	ENSG00000185345.18		chr6	162672686	162672719	AC	0.703675	1	0.703675	0.994214
chr17	8340505	8345343	Testis	ODF4	ENSG00000184650.10		chr17	8334062	8334101	AAAAC	0.703913	1	0.703913	0.994214
chr13	46064741	46073873	Liver	CPB2	ENSG00000080618.13		chr13	46059578	46059619	ATC	0.704382	1	0.704382	0.994214
chr7	138596530	138625969	Testis	SVOPL	ENSG00000157703.15		chr7	138597642	138597669	AC	0.706829	1	0.706829	0.995395
chr16	15949799	16007816	Esophagus_Mucosa	ABCC1	ENSG00000103222.18		chr16	16007215	16007244	GT	0.706856	1	0.706856	0.995395
chr17	1783476	1783616	Muscle_Skeletal	SMYD4	ENSG00000186532.11		chr17	1779480	1779514	GTTTT	0.353736	2	0.707473	0.995654
chr19	7497682	7504121	Testis	C19orf45	ENSG00000198723.10		chr19	7504081	7504094	CT	0.708901	1	0.708901	0.997055
chr3	42561296	42568865	Breast_Mammary_Tissue	SEC22C	ENSG00000093183.13		chr3	42578540	42578571	GT	0.236487	3	0.70946	0.997231
chr20	6015490	6023292	Esophagus_Muscularis	CRLS1	ENSG00000088766.11		chr20	6016455	6016474	GT	0.0592013	12	0.710415	0.997356
chr7	22419836	22451072	Cells_Cultured_fibroblasts	STEAP1B	ENSG00000105889.14		chr7	22416611	22416626	AC	0.710117	1	0.710117	0.997356
chr5	180947625	180948355	Stomach	BTNL8	ENSG00000113303.11		chr5	180945988	180946015	AAAT	0.236951	3	0.710854	0.997363
chr1	178094694	178283564	Lung	RASAL2	ENSG00000075391.16		chr1	178089440	178089481	GT	0.178058	4	0.71223	0.998685
chr12	69470530	69530865	Pituitary	FRS2	ENSG00000166225.8		chr12	69498520	69498551	GT	0.0356682	20	0.713365	0.999058
chr12	132108682	132120420	Pituitary	EP400NL	ENSG00000185684.12		chr12	132129592	132129619	GTTT	0.713137	1	0.713137	0.999058
chr1	179884769	179889310	Muscle_Skeletal	TOR1AIP1	ENSG00000143337.18		chr1	179880043	179880074	GT	0.0175782	48	0.843754	1
chr14	100369258	100374136	Colon_Transverse	WARS	ENSG00000140105.17		chr14	100365125	100365162	GT	0.0194062	37	0.718028	1
chr7	23691596	23700786	Brain_Amygdala	FAM221A	ENSG00000188732.10		chr7	23708270	23708301	GT	0.0194127	41	0.795919	1
chr10	93700106	93701676	Colon_Sigmoid	FRA10AC1	ENSG00000148690.11		chr10	93707177	93707211	CCTCT	0.0220022	34	0.748076	1
chr17	47082350	47099835	Brain_Putamen_basal_ganglia	RP11-156P1.3	ENSG00000262879.5		chr17	47100725	47100774	GT	0.0225459	43	0.969473	1
chr7	43648652	43729429	Testis	COA1	ENSG00000106603.18		chr7	43656821	43656845	CTTTT	0.0231354	41	0.948553	1
chr2	219001	229966	Brain_Cerebellum	SH3YL1	ENSG00000035115.21		chr2	227890	227909	AC	0.023893	48	1	1
chr14	91170201	91173289	Brain_Nucleus_accumbens_basal_ganglia	C14orf159	ENSG00000133943.20		chr14	91181966	91181993	ATTT	0.0252166	40	1	1
chr11	47237712	47237837	Colon_Transverse	DDB2	ENSG00000134574.11		chr11	47245858	47245885	AC	0.0282675	40	1	1
chr17	43125770	43131208	Colon_Sigmoid	NBR2	ENSG00000198496.10		chr17	43131381	43131398	AAT	0.029243	38	1	1
chr7	100152757	100153400	Brain_Caudate_basal_ganglia	LAMTOR4	ENSG00000188186.10		chr7	100147622	100147655	GT	0.0306789	41	1	1
chr6	2398778	2398866	Brain_Cortex	GMDS-AS1	ENSG00000250903.8		chr6	2407307	2407358	ATCT	0.0307732	29	0.892424	1
chr8	73946820	73955647	Spleen	ELOC	ENSG00000154582.16		chr8	73948836	73948879	CTTG	0.0319672	25	0.799179	1
chr9	129828252	129829236	Colon_Sigmoid	C9orf78	ENSG00000136819.15		chr9	129823491	129823514	CTGGGG	0.0321269	39	1	1
chr17	7626793	7627143	Brain_Cortex	SAT2	ENSG00000141504.11		chr17	7629376	7629415	AAAAT	0.0328198	45	1	1
chr17	81682149	81682491	Heart_Left_Ventricle	ARL16	ENSG00000214087.8		chr17	81676449	81676462	CT	0.033367	46	1	1
chr15	76295737	76309932	Cells_EBV-transformed_lymphocytes	ETFA	ENSG00000140374.15		chr15	76301705	76301729	GTTTT	0.0347127	34	1	1
chr15	64088851	64093645	Adipose_Subcutaneous	FAM96A	ENSG00000166797.10		chr15	64085082	64085121	ATTTT	0.0362289	23	0.833264	1
chr1	6825210	6871757	Nerve_Tibial	CAMTA1	ENSG00000171735.18		chr1	6872234	6872263	ACC	0.0370423	21	0.777889	1
chr1	212433120	212442546	Testis	NENF	ENSG00000117691.9		chr1	212449887	212449918	AAAC	0.0388957	40	1	1
chr12	103947430	103953386	Small_Intestine_Terminal_Ileum	HSP90B1	ENSG00000166598.14		chr12	103961538	103961570	AAC	0.0430059	20	0.860118	1
chr4	125296	126848	Brain_Putamen_basal_ganglia	ZNF718	ENSG00000250312.6		chr4	116059	116082	GT	0.0430459	44	1	1
chr12	120197462	120198854	Muscle_Skeletal	RPLP0	ENSG00000089157.15		chr12	120204063	120204098	AC	0.0435046	23	1	1
chr4	174495624	174508696	Colon_Sigmoid	HPGD	ENSG00000164120.13		chr4	174504815	174504854	GTTT	0.0435775	17	0.740818	1
chr11	7665546	7667728	Ovary	CYB5R2	ENSG00000166394.14		chr11	7672623	7672642	GT	0.0438548	17	0.745532	1
chr19	19630537	19633803	Esophagus_Muscularis	GMIP	ENSG00000089639.10		chr19	19624790	19624833	AC	0.0455847	17	0.77494	1
chr11	119019424	119020150	Thyroid	TRAPPC4	ENSG00000196655.11		chr11	119018676	119018699	AGG	0.0465162	16	0.74426	1
chr1	1739704	1745724	Stomach	SLC35E2	ENSG00000215790.6		chr1	1752909	1752935	AGG	0.0467741	29	1	1
chr12	103956748	103957140	Artery_Tibial	C12orf73	ENSG00000204954.9		chr12	103961538	103961570	AAC	0.0470484	33	1	1
chr1	244835756	244842195	Cells_Cultured_fibroblasts	COX20	ENSG00000203667.9		chr1	244829138	244829169	AATC	0.0470703	24	1	1
chr21	33245074	33246718	Pituitary	IFNAR2	ENSG00000159110.19		chr21	33237079	33237110	GT	0.0473112	19	0.898913	1
chr16	15867516	15873491	Uterus	FOPNL	ENSG00000133393.12		chr16	15882528	15882551	GTTT	0.0475079	42	1	1
chr6	169217829	169220198	Nerve_Tibial	THBS2	ENSG00000186340.14		chr6	169210384	169210421	AC	0.0489093	21	1	1
chr17	82101866	82108768	Brain_Hippocampus	CCDC57	ENSG00000176155.18		chr17	82117744	82117763	GTTT	0.0492327	30	1	1
chr11	8140193	8153375	Esophagus_Muscularis	RIC3	ENSG00000166405.14		chr11	8131108	8131143	AGTG	0.0498465	18	0.897238	1
chr2	119223888	119239363	Pituitary	STEAP3	ENSG00000115107.19		chr2	119231343	119231384	GT	0.0512418	17	0.87111	1
chr20	3864788	3865683	Thyroid	MAVS	ENSG00000088888.17		chr20	3861744	3861769	GT	0.0546041	15	0.819061	1
chr1	54607265	54607942	Esophagus_Mucosa	ACOT11	ENSG00000162390.17		chr1	54614940	54614953	GT	0.0562651	19	1	1
chr2	10396920	10419734	Artery_Aorta	HPCAL1	ENSG00000115756.12		chr2	10403455	10403504	GT	0.056301	37	1	1
chr11	17878244	17988597	Brain_Nucleus_accumbens_basal_ganglia	SERGEF	ENSG00000129158.10		chr11	17888629	17888678	GT	0.0563857	15	0.845785	1
chr16	70680055	70680794	Brain_Nucleus_accumbens_basal_ganglia	MTSS1L	ENSG00000132613.14		chr16	70687525	70687546	GT	0.0569819	13	0.740765	1
chr19	41432408	41433537	Brain_Cerebellum	ATP5SL	ENSG00000105341.18		chr19	41432784	41432817	AC	0.0578638	40	1	1
chr8	85462801	85463178	Testis	CA3-AS1	ENSG00000253549.5		chr8	85463770	85463801	CCGGGGCT	0.0584039	15	0.876059	1
chr19	40348768	40366419	Pancreas	PLD3	ENSG00000105223.19		chr19	40363415	40363446	GTTT	0.0587477	14	0.822468	1
chr7	77685328	77695896	Muscle_Skeletal	APTR	ENSG00000214293.8		chr7	77704992	77705005	GT	0.0596042	47	1	1
chr3	40457747	40457890	Esophagus_Gastroesophageal_Junction	RPL14	ENSG00000188846.13		chr3	40451412	40451447	GT	0.0601175	34	1	1
chr19	20935047	20942801	Esophagus_Mucosa	ZNF85	ENSG00000105750.14		chr19	20946571	20946592	AC	0.0604886	25	1	1
chr17	5338138	5346790	Lung	RABEP1	ENSG00000029725.16		chr17	5347411	5347450	AAAC	0.0605224	18	1	1
chr9	7798637	7799683	Esophagus_Gastroesophageal_Junction	TMEM261	ENSG00000137038.7		chr9	7806841	7806878	AC	0.0612155	25	1	1
chr3	197282845	197296346	Pancreas	DLG1	ENSG00000075711.20		chr3	197289342	197289367	GT	0.0613286	26	1	1
chr20	44197739	44202961	Brain_Nucleus_accumbens_basal_ganglia	OSER1	ENSG00000132823.10		chr20	44203695	44203730	GT	0.0619521	16	0.991233	1
chr14	94055184	94057822	Thyroid	DDX24	ENSG00000089737.16		chr14	94065385	94065404	GT	0.062157	18	1	1
chr11	5697469	5698315	Spleen	TRIM22	ENSG00000132274.15		chr11	5697700	5697715	GTTT	0.0625897	17	1	1
chr17	41827626	41830801	Esophagus_Muscularis	NT5C3B	ENSG00000141698.16		chr17	41826212	41826235	AAAG	0.0634485	45	1	1
chr19	49538754	49539119	Adipose_Subcutaneous	RCN3	ENSG00000142552.7		chr19	49529184	49529195	AAC	0.0653437	23	1	1
chr6	29728495	29737966	Artery_Coronary	HLA-F-AS1	ENSG00000214922.9		chr6	29731525	29731542	AG	0.0667505	24	1	1
chr6	29728495	29737966	Artery_Coronary	MICE	ENSG00000273340.1		chr6	29731525	29731542	AG	0.0667505	22	1	1
chr13	49344238	49350744	Nerve_Tibial	CAB39L	ENSG00000102547.18		chr13	49351263	49351298	AC	0.0670572	15	1	1
chr5	139476454	139478270	Lung	TMEM173	ENSG00000184584.12		chr5	139486091	139486120	CT	0.0675402	48	1	1
chr2	232850409	232856793	Nerve_Tibial	GIGYF2	ENSG00000204120.14		chr2	232840526	232840553	ATTC	0.0678645	12	0.814374	1
chr16	53470922	53479886	Heart_Atrial_Appendage	RBL2	ENSG00000103479.15		chr16	53477058	53477081	GT	0.068504	26	1	1
chr11	124804848	124805267	Brain_Nucleus_accumbens_basal_ganglia	RP11-677M14.7	ENSG00000245498.6		chr11	124802354	124802389	GT	0.0688019	12	0.825623	1
chr2	213296110	213297262	Lung	SPAG16	ENSG00000144451.18		chr2	213302623	213302660	GT	0.0690728	29	1	1
chr17	29107189	29110436	Artery_Coronary	MYO18A	ENSG00000196535.15		chr17	29116614	29116625	GT	0.0692482	11	0.76173	1
chr19	52781464	52786595	Adipose_Visceral_Omentum	ZNF600	ENSG00000189190.9		chr19	52793765	52793818	GT	0.0693857	15	1	1
chr21	45487509	45488418	Testis	COL18A1	ENSG00000182871.14		chr21	45479602	45479617	AC	0.0701929	21	1	1
chr4	102726683	102760718	Nerve_Tibial	MANBA	ENSG00000109323.8		chr4	102760090	102760111	GT	0.0724175	24	1	1
chr2	47333026	47344901	Brain_Hippocampus	AC073283.4	ENSG00000234690.6		chr2	47336195	47336220	GT	0.0724434	14	1	1
chr9	127811011	127813195	Breast_Mammary_Tissue	FPGS	ENSG00000136877.14		chr9	127801457	127801474	GT	0.0728548	22	1	1
chr19	32437339	32438943	Cells_Cultured_fibroblasts	DPY19L3	ENSG00000178904.18		chr19	32438944	32438973	ATG	0.0736224	15	1	1
chr16	77735986	77736650	Nerve_Tibial	NUDT7	ENSG00000140876.11		chr16	77737004	77737048	AAACTAGACCATAGG	0.0745554	12	0.894665	1
chr15	89877424	89888521	Muscle_Skeletal	AP3S2	ENSG00000157823.16		chr15	89895880	89895907	AAAC	0.0766514	12	0.919817	1
chr1	165631293	165649841	Adrenal_Gland	MGST3	ENSG00000143198.12		chr1	165624309	165624344	AC	0.0771915	16	1	1
chr7	149875645	149879335	Liver	ATP6V0E2	ENSG00000171130.17		chr7	149883991	149884010	CCCT	0.0778708	28	1	1
chr17	18865564	18865802	Adipose_Visceral_Omentum	PRPSAP2	ENSG00000141127.14		chr17	18861884	18861903	GTTT	0.0779088	13	1	1
chr22	50294778	50295377	Uterus	PLXNB2	ENSG00000196576.14		chr22	50296194	50296229	GT	0.0809139	38	1	1
chr10	97478389	97480241	Vagina	MMS19	ENSG00000155229.20		chr10	97475212	97475231	AC	0.0821467	31	1	1
chr3	191370036	191380159	Cells_Cultured_fibroblasts	CCDC50	ENSG00000152492.13		chr3	191365089	191365100	GT	0.0839178	10	0.839178	1
chr17	69287751	69289177	Testis	ABCA5	ENSG00000154265.15		chr17	69293165	69293182	GT	0.0840546	33	1	1
chr11	66364424	66365936	Skin_Not_Sun_Exposed_Suprapubic	SLC29A2	ENSG00000174669.11		chr11	66364829	66364844	AC	0.0841894	13	1	1
chr15	96126115	96127162	Heart_Atrial_Appendage	NR2F2-AS1	ENSG00000247809.7		chr15	96123673	96123694	GT	0.0865727	11	0.9523	1
chr10	72477256	72508155	Pituitary	MICU1	ENSG00000107745.17		chr10	72471931	72471946	AC	0.0875427	12	1	1
chr14	103700727	103701201	Cells_Cultured_fibroblasts	KLC1	ENSG00000126214.21		chr14	103710854	103710883	AC	0.0888253	10	0.888253	1
chr17	3592383	3608427	Artery_Aorta	TRPV1	ENSG00000196689.11		chr17	3609323	3609350	CT	0.0909083	9	0.818175	1
chr19	4208801	4210058	Brain_Caudate_basal_ganglia	ANKRD24	ENSG00000089847.12		chr19	4210710	4210748	ACTTCCCATGCCC	0.0965984	13	1	1
chr22	31160303	31192684	Muscle_Skeletal	RNF185	ENSG00000138942.15		chr22	31157844	31157871	AAAC	0.0969627	10	0.969627	1
chr4	38680682	38688585	Adrenal_Gland	KLF3	ENSG00000109787.12		chr4	38677879	38677916	GT	0.0973869	9	0.876482	1
chr15	101188219	101235082	Cells_Cultured_fibroblasts	CHSY1	ENSG00000131873.5		chr15	101186320	101186351	ATTT	0.0992852	12	1	1
chr7	73737110	73737562	Cells_Cultured_fibroblasts	ABHD11	ENSG00000106077.18		chr7	73733663	73733682	AC	0.0999738	30	1	1
chr15	40046069	40073753	Testis	SRP14-AS1	ENSG00000248508.6		chr15	40050450	40050489	GT	0.102801	8	0.82241	1
chr6	33621691	33631439	Skin_Not_Sun_Exposed_Suprapubic	ITPR3	ENSG00000096433.10		chr6	33613761	33613790	GT	0.102893	7	0.720251	1
chr11	126306744	126330194	Spleen	DCPS	ENSG00000110063.8		chr11	126333866	126333891	CT	0.104046	9	0.936417	1
chr1	19623583	19626387	Muscle_Skeletal	MINOS1	ENSG00000173436.13		chr1	19632252	19632283	GT	0.104582	11	1	1
chr14	23095950	23097658	Artery_Tibial	C14orf119	ENSG00000179933.5		chr14	23103568	23103592	GTTTT	0.105748	12	1	1
chr19	618281	618488	Ovary	POLRMT	ENSG00000099821.13		chr19	612394	612427	GT	0.108298	23	1	1
chr21	42904276	42908864	Thyroid	NDUFV3	ENSG00000160194.17		chr21	42897407	42897441	GTTTT	0.108586	15	1	1
chr14	59484593	59486681	Cells_Cultured_fibroblasts	JKAMP	ENSG00000050130.17		chr14	59494122	59494137	GT	0.112195	7	0.785365	1
chr1	177960403	177960791	Thyroid	SEC16B	ENSG00000120341.18		chr1	177965401	177965416	AC	0.113143	12	1	1
chr12	132582266	132582971	Esophagus_Muscularis	FBRSL1	ENSG00000112787.12		chr12	132584820	132584851	AC	0.115518	31	1	1
chr22	24321323	24324220	Adipose_Visceral_Omentum	SPECC1L	ENSG00000100014.19		chr22	24316275	24316298	ATTT	0.119801	7	0.838605	1
chr6	36916574	36919578	Adipose_Subcutaneous	C6orf89	ENSG00000198663.16		chr6	36907276	36907310	GTTTT	0.12029	7	0.842033	1
chr9	37489400	37492657	Artery_Aorta	POLR1E	ENSG00000137054.15		chr9	37500156	37500195	GTTTT	0.121997	27	1	1
chr4	38054338	38089932	Adipose_Subcutaneous	TBC1D1	ENSG00000065882.15		chr4	38093697	38093717	AGT	0.122103	11	1	1
chr16	4514664	4538702	Cells_Cultured_fibroblasts	CDIP1	ENSG00000089486.16		chr16	4521088	4521109	AC	0.12352	25	1	1
chr9	104858698	104861679	Liver	ABCA1	ENSG00000165029.15		chr9	104850120	104850139	AAAC	0.123581	10	1	1
chr14	23016635	23033368	Nerve_Tibial	PSMB5	ENSG00000100804.18		chr14	23009483	23009500	GT	0.12455	13	1	1
chr19	13883400	13885961	Brain_Hippocampus	C19orf57	ENSG00000132016.11		chr19	13876693	13876706	AC	0.125133	7	0.875928	1
chr18	62282444	62285449	Esophagus_Muscularis	KIAA1468	ENSG00000134444.13		chr18	62285120	62285147	GTTT	0.130486	11	1	1
chr17	73212740	73227165	Artery_Tibial	FAM104A	ENSG00000133193.12		chr17	73205164	73205187	AAAC	0.130968	14	1	1
chr19	21505774	21529658	Spleen	ZNF429	ENSG00000197013.9		chr19	21499929	21499972	GT	0.132765	10	1	1
chr5	128061244	128062370	Brain_Cerebellum	LINC01184	ENSG00000245937.7		chr5	128057042	128057053	GTTT	0.133922	11	1	1
chr8	716007	731140	Colon_Transverse	ERICH1	ENSG00000104714.13		chr8	738675	738704	CTGGG	0.138875	7	0.972123	1
chr17	1125367	1179667	Esophagus_Muscularis	ABR	ENSG00000159842.14		chr17	1160283	1160308	GT	0.141915	6	0.851492	1
chr19	8825108	8831318	Thyroid	ZNF558	ENSG00000167785.8		chr19	8816056	8816077	GT	0.143077	5	0.715383	1
chr2	70300980	70301925	Artery_Tibial	FAM136A	ENSG00000035141.7		chr2	70304466	70304501	CTTG	0.143616	7	1	1
chr17	72649268	72736650	Whole_Blood	SLC39A11	ENSG00000133195.11		chr17	72731714	72731745	AAAC	0.143759	11	1	1
chr9	32553944	32570960	Nerve_Tibial	NDUFB6	ENSG00000165264.10		chr9	32547039	32547062	GTTT	0.144661	6	0.867964	1
chr10	84213348	84214082	Spleen	CDHR1	ENSG00000148600.14		chr10	84205515	84205544	AC	0.147633	8	1	1
chr20	35584093	35595477	Cells_Cultured_fibroblasts	FER1L4	ENSG00000088340.15		chr20	35596239	35596263	GTTTT	0.147909	18	1	1
chr20	62642553	62667745	Lung	SLCO4A1	ENSG00000101187.15		chr20	62635926	62635946	CGGGCTG	0.14799	6	0.887942	1
chr7	40237726	40316760	Breast_Mammary_Tissue	SUGCT	ENSG00000175600.15		chr7	40296613	40296654	GT	0.148593	11	1	1
chr22	23825415	23833572	Adipose_Visceral_Omentum	SMARCB1	ENSG00000099956.18		chr22	23819323	23819346	ATTC	0.149662	5	0.748312	1
chr7	111417342	111487238	Nerve_Tibial	IMMP2L	ENSG00000184903.9		chr7	111478560	111478591	AAAC	0.150135	7	1	1
chr4	158172940	158179661	Ovary	RP11-597D13.9	ENSG00000248429.5		chr4	158188574	158188613	AC	0.150521	8	1	1
chr22	33384304	33432161	Ovary	LARGE1	ENSG00000133424.20		chr22	33389848	33389891	GGTT	0.153704	7	1	1
chr19	9324780	9364862	Brain_Cerebellum	ZNF177	ENSG00000188629.11		chr19	9332356	9332369	AT	0.153733	12	1	1
chr19	41423169	41424438	Esophagus_Mucosa	BCKDHA	ENSG00000248098.11		chr19	41432784	41432817	AC	0.153971	10	1	1
chr18	5445244	5478241	Adipose_Subcutaneous	EPB41L3	ENSG00000082397.17		chr18	5452783	5452804	AC	0.156538	5	0.78269	1
chr5	82178587	82276145	Brain_Anterior_cingulate_cortex_BA24	ATG10	ENSG00000152348.15		chr5	82263129	82263158	AC	0.157639	10	1	1
chr21	36141946	36146256	Artery_Aorta	CBR3-AS1	ENSG00000236830.6		chr21	36138104	36138133	AGTTT	0.157815	16	1	1
chr19	51225155	51225803	Minor_Salivary_Gland	CD33	ENSG00000105383.14		chr19	51216224	51216267	GT	0.16332	19	1	1
chr5	10683571	10748175	Heart_Atrial_Appendage	DAP	ENSG00000112977.15		chr5	10742925	10742952	ATGG	0.16362	10	1	1
chr4	184697803	184702089	Colon_Transverse	CENPU	ENSG00000151725.11		chr4	184699332	184699355	ATTT	0.163806	7	1	1
chr19	20406132	20408950	Colon_Transverse	ZNF826P	ENSG00000231205.11		chr19	20409962	20409987	GT	0.164963	15	1	1
chr15	73751697	73752110	Heart_Left_Ventricle	C15orf59	ENSG00000205363.5		chr15	73745811	73745835	GTTTT	0.168041	14	1	1
chr10	3120044	3129819	Stomach	PFKP	ENSG00000067057.16		chr10	3120370	3120399	GT	0.169213	15	1	1
chr9	129957464	129958491	Brain_Frontal_Cortex_BA9	FNBP1	ENSG00000187239.16		chr9	129966733	129966762	GTT	0.16951	8	1	1
chr3	123931234	123933673	Testis	CCDC14	ENSG00000175455.14		chr3	123933098	123933129	GTTT	0.170615	9	1	1
chr7	45177215	45177309	Adrenal_Gland	RAMP3	ENSG00000122679.8		chr7	45186011	45186042	ATGTGTGT	0.171805	6	1	1
chr15	25059718	25061950	Artery_Aorta	SNHG14	ENSG00000224078.13		chr15	25058898	25058925	AC	0.17306	14	1	1
chr5	132333621	132334785	Testis	AC034220.3	ENSG00000233006.6		chr5	132328578	132328604	AAC	0.173644	10	1	1
chr10	13675044	13693482	Nerve_Tibial	FRMD4A	ENSG00000151474.21		chr10	13698087	13698102	CCCT	0.175387	8	1	1
chr3	185624082	185626298	Muscle_Skeletal	SENP2	ENSG00000163904.12		chr3	185633609	185633628	AC	0.175825	5	0.879126	1
chr2	44316444	44319006	Brain_Frontal_Cortex_BA9	PREPL	ENSG00000138078.15		chr2	44314593	44314608	AC	0.176408	13	1	1
chr8	38728671	38742351	Artery_Aorta	TACC1	ENSG00000147526.19		chr8	38731738	38731767	AAC	0.177152	7	1	1
chr9	33401287	33401536	Thyroid	AQP7	ENSG00000165269.12		chr9	33407486	33407509	AC	0.184842	9	1	1
chr1	151156722	151163931	Adipose_Visceral_Omentum	TNFAIP8L2	ENSG00000163154.5		chr1	151163879	151163912	AC	0.18548	4	0.74192	1
chr1	151156722	151163931	Adipose_Visceral_Omentum	SCNM1	ENSG00000163156.11		chr1	151163879	151163912	AC	0.18548	4	0.74192	1
chr12	113107595	113108085	Esophagus_Mucosa	RASAL1	ENSG00000111344.11		chr12	113112955	113112974	ATTT	0.185789	4	0.743157	1
chr12	47795767	47796207	Thyroid	HDAC7	ENSG00000061273.17		chr12	47797856	47797895	AC	0.188118	5	0.940592	1
chr10	6583918	6584118	Whole_Blood	PRKCQ-AS1	ENSG00000237943.6		chr10	6586116	6586149	AC	0.196261	4	0.785044	1
chr20	2755824	2758909	Prostate	EBF4	ENSG00000088881.20		chr20	2764301	2764330	GT	0.198096	4	0.792383	1
chr6	6002497	6006695	Thyroid	NRN1	ENSG00000124785.8		chr6	6007567	6007598	GT	0.208039	5	1	1
chr9	137264349	137265877	Lung	NELFB	ENSG00000188986.6		chr9	137267180	137267212	AGGTGGGGCTG	0.209806	5	1	1
chr1	245929937	246327201	Skin_Not_Sun_Exposed_Suprapubic	SMYD3	ENSG00000185420.18		chr1	246074914	246074951	GT	0.212279	5	1	1
chr3	64685338	64799465	Uterus	ADAMTS9-AS2	ENSG00000241684.5		chr3	64692856	64692889	AC	0.212601	4	0.850402	1
chr3	53165215	53178404	Muscle_Skeletal	PRKCD	ENSG00000163932.13		chr3	53162696	53162721	GT	0.215019	5	1	1
chr19	8323538	8324449	Thyroid	KANK3	ENSG00000186994.11		chr19	8328388	8328433	GT	0.21776	4	0.871039	1
chr3	159765138	159866163	Brain_Substantia_nigra	SCHIP1	ENSG00000151967.18		chr3	159815938	159815965	ATTT	0.223978	5	1	1
chr14	73961570	73961737	Colon_Sigmoid	COQ6	ENSG00000119723.16		chr14	73969716	73969739	ATTT	0.225891	8	1	1
chr14	50109713	50114285	Skin_Sun_Exposed_Lower_leg	VCPKMT	ENSG00000100483.13		chr14	50117048	50117067	AC	0.227692	5	1	1
chr5	37605238	37697655	Adipose_Subcutaneous	WDR70	ENSG00000082068.8		chr5	37694841	37694864	AAT	0.228842	4	0.915369	1
chr17	81682149	81682491	Brain_Cerebellum	OXLD1	ENSG00000204237.4		chr17	81676449	81676462	CT	0.228865	6	1	1
chr17	82932855	82937271	Thyroid	TBCD	ENSG00000141556.20		chr17	82940222	82940245	AC	0.229036	5	1	1
chr7	75043109	75052711	Nerve_Tibial	RCC1L	ENSG00000274523.4		chr7	75041215	75041238	AGTT	0.236409	8	1	1
chr12	123590449	123596605	Liver	TMED2	ENSG00000086598.10		chr12	123600296	123600323	GTTT	0.23814	6	1	1
chr21	41345736	41347013	Esophagus_Mucosa	FAM3B	ENSG00000183844.16		chr21	41356041	41356084	NA	0.239317	3	0.717951	1
chr5	17117486	17162469	Brain_Cerebellar_Hemisphere	AC091878.1	ENSG00000215196.4		chr5	17129047	17129088	AAC	0.240584	3	0.721752	1
chr20	2659312	2659525	Esophagus_Muscularis	IDH3B	ENSG00000101365.20		chr20	2669362	2669385	AC	0.240799	6	1	1
chr2	240895969	240896809	Skin_Sun_Exposed_Lower_leg	C2orf54	ENSG00000172478.17		chr2	240894798	240894813	GTTT	0.241669	6	1	1
chr12	123499536	123523495	Artery_Tibial	RILPL1	ENSG00000188026.12		chr12	123501444	123501467	GTTT	0.242167	8	1	1
chr6	32198730	32200831	Stomach	NOTCH4	ENSG00000204301.6		chr6	32199704	32199718	GTTTT	0.243545	5	1	1
chr1	112550693	112576986	Skin_Sun_Exposed_Lower_leg	ST7L	ENSG00000007341.18		chr1	112553234	112553259	GT	0.246468	5	1	1
chr22	42128944	42142728	Ovary	CYP2D6	ENSG00000100197.20		chr22	42148527	42148560	GT	0.249175	16	1	1
chr22	42128944	42142728	Ovary	CYP2D7	ENSG00000205702.10		chr22	42148527	42148560	GT	0.249175	20	1	1
chr3	31533312	31576396	Adipose_Visceral_Omentum	STT3B	ENSG00000163527.9		chr3	31551202	31551229	GTTT	0.25044	3	0.751319	1
chr16	57657491	57659395	Thyroid	ADGRG1	ENSG00000205336.11		chr16	57655319	57655334	GT	0.252935	8	1	1
chr19	15125069	15125380	Thyroid	ILVBL	ENSG00000105135.15		chr19	15133711	15133758	GT	0.253881	12	1	1
chr11	57399566	57409175	Skin_Sun_Exposed_Lower_leg	PRG2	ENSG00000186652.9		chr11	57407666	57407691	AC	0.254399	4	1	1
chr5	169583889	169588394	Stomach	SPDL1	ENSG00000040275.16		chr5	169597233	169597266	GT	0.256035	6	1	1
chr19	4327385	4328675	Esophagus_Muscularis	STAP2	ENSG00000178078.11		chr19	4338121	4338138	GT	0.256322	5	1	1
chr7	5063755	5072362	Nerve_Tibial	RBAK	ENSG00000146587.17		chr7	5063478	5063513	GT	0.256931	3	0.770793	1
chr7	5063755	5072362	Nerve_Tibial	RBAKDN	ENSG00000273313.1		chr7	5063478	5063513	GT	0.256931	6	1	1
chr15	90219891	90221367	Skin_Not_Sun_Exposed_Suprapubic	SEMA4B	ENSG00000185033.14		chr15	90212644	90212667	AC	0.258838	3	0.776515	1
chr1	45329437	45330516	Muscle_Skeletal	MUTYH	ENSG00000132781.17		chr1	45326474	45326505	GT	0.259951	12	1	1
chr2	171522738	171553346	Artery_Tibial	CYBRD1	ENSG00000071967.11		chr2	171532876	171532911	GT	0.260349	3	0.781047	1
chr3	159765138	159866163	Brain_Spinal_cord_cervical_c-1	IQCJ-SCHIP1	ENSG00000283154.2		chr3	159815938	159815965	ATTT	0.261201	4	1	1
chr3	136958201	136980331	Esophagus_Mucosa	IL20RB	ENSG00000174564.12		chr3	136970612	136970663	CCTT	0.261446	3	0.784337	1
chr6	169776065	169776334	Esophagus_Muscularis	ERMARD	ENSG00000130023.15		chr6	169767757	169767780	AC	0.262281	8	1	1
chr1	52643002	52648451	Spleen	FAM159A	ENSG00000182183.14		chr1	52645397	52645421	GTTTT	0.262305	4	1	1
chr4	78464583	78469978	Cells_Cultured_fibroblasts	FRAS1	ENSG00000138759.18		chr4	78468486	78468521	ATC	0.263042	3	0.789126	1
chr19	39200484	39200601	Skin_Sun_Exposed_Lower_leg	NCCRP1	ENSG00000188505.4		chr19	39195871	39195890	AG	0.263845	3	0.791534	1
chr16	4469698	4474093	Adrenal_Gland	NMRAL1	ENSG00000153406.13		chr16	4483161	4483224	GT	0.264639	3	0.793916	1
chr8	69629679	69638735	Artery_Tibial	SULF1	ENSG00000137573.13		chr8	69623722	69623769	AATGGCACTGCCAGGC	0.264975	5	1	1
chr9	113368842	113369616	Pancreas	BSPRY	ENSG00000119411.10		chr9	113359030	113359049	AAAAG	0.266558	5	1	1
chr11	122292403	122367496	Lung	RP11-716H6.1	ENSG00000255015.1		chr11	122303046	122303075	GTT	0.266989	6	1	1
chr11	122292403	122367496	Lung	MIR100HG	ENSG00000255248.7		chr11	122303046	122303075	GTT	0.266989	6	1	1
chr10	27029356	27033225	Esophagus_Muscularis	ANKRD26	ENSG00000107890.16		chr10	27023980	27024007	GT	0.268155	9	1	1
chr17	62627920	62664548	Lung	MRC2	ENSG00000011028.13		chr17	62641896	62641919	GT	0.268412	5	1	1
chr10	124412200	124414346	Minor_Salivary_Gland	OAT	ENSG00000065154.11		chr10	124420131	124420142	ATTG	0.270866	4	1	1
chr19	46213010	46213797	Pituitary	AC006262.6	ENSG00000268460.1		chr19	46212714	46212737	CT	0.276385	10	1	1
chr2	73958207	73981135	Colon_Transverse	DGUOK-AS1	ENSG00000237883.1		chr2	73971320	73971331	ACC	0.279075	7	1	1
chr1	119076607	119140555	Colon_Sigmoid	WARS2	ENSG00000116874.11		chr1	119123604	119123623	GT	0.283884	3	0.851653	1
chr14	55129300	55130586	Brain_Frontal_Cortex_BA9	LGALS3	ENSG00000131981.15		chr14	55128739	55128752	AT	0.288139	6	1	1
chr6	158767078	158767261	Thyroid	EZR	ENSG00000092820.17		chr6	158765916	158765927	GTTT	0.288529	3	0.865586	1
chr1	235958003	235978995	Adipose_Subcutaneous	RP4-580N22.2	ENSG00000229291.1		chr1	235985725	235985754	AC	0.289209	3	0.867626	1
chr17	35598335	35605705	Testis	AP2B1	ENSG00000006125.17		chr17	35612881	35612908	AC	0.2917	3	0.875101	1
chr19	51855967	51860904	Adrenal_Gland	ZNF577	ENSG00000161551.14		chr19	51855368	51855407	AC	0.292311	9	1	1
chr19	46989675	46999304	Testis	ARHGAP35	ENSG00000160007.18		chr19	46981826	46981870	GTTTT	0.295637	3	0.886912	1
chr10	125994960	125995417	Lung	FANK1	ENSG00000203780.10		chr10	125991251	125991278	GT	0.296828	3	0.890485	1
chr3	11426926	11467398	Cells_Cultured_fibroblasts	ATG7	ENSG00000197548.12		chr3	11465089	11465114	GT	0.297146	4	1	1
chr10	73913381	73913539	Artery_Tibial	PLAU	ENSG00000122861.15		chr10	73909890	73909907	GT	0.297941	5	1	1
chr2	32702920	32733828	Skin_Sun_Exposed_Lower_leg	TTC27	ENSG00000018699.11		chr2	32708679	32708699	GTT	0.298043	5	1	1
chr14	44899076	44899230	Artery_Aorta	RP11-857B24.1	ENSG00000258633.1		chr14	44889480	44889499	AAAC	0.304106	3	0.912318	1
chr14	44899076	44899230	Artery_Aorta	RP11-857B24.5	ENSG00000258949.1		chr14	44889480	44889499	AAAC	0.304106	3	0.912318	1
chr6	109348547	109354848	Minor_Salivary_Gland	CCDC162P	ENSG00000203799.12		chr6	109342834	109342859	GT	0.304367	14	1	1
chr11	14477015	14478651	Artery_Coronary	COPB1	ENSG00000129083.12		chr11	14483229	14483258	GT	0.304492	5	1	1
chr3	50303563	50303788	Skin_Sun_Exposed_Lower_leg	HYAL1	ENSG00000114378.16		chr3	50306886	50306909	GTT	0.310585	5	1	1
chr6	36954931	36959145	Testis	PI16	ENSG00000164530.13		chr6	36960326	36960363	GT	0.310914	4	1	1
chr2	85134450	85283495	Adipose_Subcutaneous	TCF7L1-IT1	ENSG00000231134.1		chr2	85168193	85168222	AC	0.31372	9	1	1
chr18	13117643	13124487	Adipose_Visceral_Omentum	CEP192	ENSG00000101639.18		chr18	13122833	13122860	GT	0.31466	3	0.94398	1
chr15	29106819	29108270	Lung	APBA2	ENSG00000034053.14		chr15	29117669	29117684	ATTG	0.314822	4	1	1
chr8	10054658	10207833	Heart_Left_Ventricle	MSRA	ENSG00000175806.14		chr8	10045916	10045939	GT	0.318538	4	1	1
chr1	161001353	161021010	Esophagus_Muscularis	F11R	ENSG00000158769.17		chr1	160995748	160995773	GT	0.319129	8	1	1
chr1	161001353	161021010	Esophagus_Muscularis	TSTD1	ENSG00000215845.10		chr1	160995748	160995773	GT	0.319129	8	1	1
chr11	22211314	22218246	Esophagus_Gastroesophageal_Junction	ANO5	ENSG00000171714.10		chr11	22213892	22213921	GTTTT	0.323945	5	1	1
chr20	2652663	2652842	Adipose_Subcutaneous	TMC2	ENSG00000149488.12		chr20	2645322	2645339	AGG	0.327269	5	1	1
chr4	761416	764984	Spleen	PCGF3	ENSG00000185619.18		chr4	772499	772530	AC	0.332109	4	1	1
chr5	43575935	43583467	Pituitary	NNT-AS1	ENSG00000248092.7		chr5	43585969	43585992	GTTT	0.337688	3	1	1
chr12	10848407	10973655	Brain_Caudate_basal_ganglia	PRH1	ENSG00000231887.6		chr12	10978901	10978928	GTTT	0.338211	3	1	1
chr9	6720997	6723527	Testis	KDM4C	ENSG00000107077.18		chr9	6725324	6725339	GT	0.340201	5	1	1
chr19	35097542	35106229	Brain_Substantia_nigra	HPN-AS1	ENSG00000227392.1		chr19	35097678	35097705	AAAT	0.342117	3	1	1
chr7	122055087	122059753	Brain_Hypothalamus	PTPRZ1	ENSG00000106278.11		chr7	122045684	122045713	AC	0.343181	7	1	1
chr5	178946986	178964655	Brain_Nucleus_accumbens_basal_ganglia	ZNF454	ENSG00000178187.7		chr5	178968106	178968141	AC	0.347608	3	1	1
chr3	129268620	129271767	Artery_Aorta	COPG1	ENSG00000181789.14		chr3	129275972	129275997	AC	0.348957	4	1	1
chr12	113003102	113004475	Lung	OAS2	ENSG00000111335.12		chr12	113005703	113005730	AAAT	0.350009	4	1	1
chr11	93500350	93524807	Testis	SMCO4	ENSG00000166002.6		chr11	93505857	93505895	ATC	0.350592	3	1	1
chr6	42188731	42208858	Brain_Anterior_cingulate_cortex_BA24	GUCA1B	ENSG00000112599.8		chr6	42187103	42187117	AAAAT	0.350608	3	1	1
chr12	113208509	113220997	Esophagus_Mucosa	IQCD	ENSG00000166578.9		chr12	113199400	113199427	ATTT	0.357684	3	1	1
chr11	94972193	94973498	Stomach	CWC15	ENSG00000150316.11		chr11	94971526	94971545	GT	0.358982	6	1	1
chr1	65190829	65218754	Skin_Sun_Exposed_Lower_leg	AK4	ENSG00000162433.14		chr1	65200104	65200133	GTTTT	0.360812	2	0.721625	1
chr20	25462541	25464523	Brain_Cerebellar_Hemisphere	NINL	ENSG00000101004.14		chr20	25462643	25462667	AAAAC	0.361705	4	1	1
chr16	21161278	21170437	Skin_Not_Sun_Exposed_Suprapubic	TMEM159	ENSG00000011638.10		chr16	21156997	21157024	GT	0.361831	3	1	1
chr19	17630750	17632782	Brain_Cerebellar_Hemisphere	UNC13A	ENSG00000130477.15		chr19	17642033	17642056	ATGG	0.362363	2	0.724725	1
chr19	14755844	14756238	Whole_Blood	ADGRE2	ENSG00000127507.17		chr19	14754440	14754487	AGAT	0.364366	2	0.728733	1
chr12	128853649	128888639	Spleen	GLT1D1	ENSG00000151948.11		chr12	128875055	128875090	GT	0.364774	2	0.729548	1
chr8	129903350	129939608	Skin_Sun_Exposed_Lower_leg	FAM49B	ENSG00000153310.19		chr8	129933897	129933920	CTT	0.365364	4	1	1
chr6	84717943	84738497	Nerve_Tibial	TBX18	ENSG00000112837.16		chr6	84710881	84710912	AATG	0.366612	2	0.733224	1
chr19	53993208	53999634	Muscle_Skeletal	CACNG6	ENSG00000130433.7		chr19	53985938	53985961	AG	0.369251	2	0.738502	1
chr22	23896110	23911778	Testis	MIF-AS1	ENSG00000218537.1		chr22	23893564	23893583	ATTC	0.369424	2	0.738847	1
chr5	34945025	34945722	Adipose_Subcutaneous	DNAJC21	ENSG00000168724.14		chr5	34952124	34952149	GT	0.371278	5	1	1
chr1	17075823	17082545	Muscle_Skeletal	PADI2	ENSG00000117115.12		chr1	17090582	17090617	AC	0.374381	3	1	1
chr7	45069961	45073460	Adipose_Subcutaneous	CCM2	ENSG00000136280.15		chr7	45065152	45065181	AATTGGGCAG	0.375018	5	1	1
chr2	182147152	182185892	Adipose_Subcutaneous	PDE1A	ENSG00000115252.18		chr2	182142124	182142157	GT	0.37536	4	1	1
chr2	111898796	111929120	Small_Intestine_Terminal_Ileum	MERTK	ENSG00000153208.16		chr2	111935639	111935686	GT	0.379756	3	1	1
chr3	150567106	150602944	Cells_Cultured_fibroblasts	SERP1	ENSG00000120742.10		chr3	150611005	150611036	GT	0.384767	2	0.769533	1
chr11	61950427	61955107	Esophagus_Gastroesophageal_Junction	BEST1	ENSG00000167995.15		chr11	61952304	61952333	AG	0.388544	8	1	1
chr3	167465673	167471588	Pancreas	SERPINI2	ENSG00000114204.14		chr3	167456151	167456188	AC	0.38895	2	0.777899	1
chr13	29553860	29595416	Cells_Cultured_fibroblasts	SLC7A1	ENSG00000139514.12		chr13	29595507	29595526	CCCCG	0.391938	2	0.783876	1
chr5	96873378	96934122	Brain_Cerebellar_Hemisphere	CTD-2260A17.2	ENSG00000247121.6		chr5	96889832	96889863	AC	0.392165	3	1	1
chr17	44868350	44875934	Skin_Sun_Exposed_Lower_leg	EFTUD2	ENSG00000108883.12		chr17	44877816	44877839	GTT	0.392572	4	1	1
chr3	72997071	72998077	Testis	PPP4R2	ENSG00000163605.14		chr3	72988430	72988453	GTT	0.392983	2	0.785967	1
chr3	72997071	72998077	Testis	GXYLT2	ENSG00000172986.12		chr3	72988430	72988453	GTT	0.392983	2	0.785967	1
chr6	149864382	149919187	Brain_Hypothalamus	RAET1E-AS1	ENSG00000223701.3		chr6	149891485	149891504	GT	0.393993	2	0.787985	1
chr6	149864382	149919187	Brain_Hypothalamus	RAET1E-AS1	ENSG00000268592.3		chr6	149891485	149891504	GT	0.393993	2	0.787985	1
chr15	82664943	82665457	Whole_Blood	AP3B2	ENSG00000103723.12		chr15	82665377	82665434	AC	0.394223	2	0.788447	1
chr3	52524611	52524963	Esophagus_Mucosa	NT5DC2	ENSG00000168268.10		chr3	52518905	52518919	CCCCG	0.394566	7	1	1
chr1	196689614	196690063	Colon_Transverse	CFHR3	ENSG00000116785.13		chr1	196689028	196689047	AAAG	0.396017	2	0.792034	1
chr16	84775225	84778895	Thyroid	USP10	ENSG00000103194.15		chr16	84778092	84778117	GT	0.396895	2	0.793791	1
chr19	47360070	47366981	Artery_Tibial	DHX34	ENSG00000134815.18		chr19	47360670	47360702	GTT	0.398901	10	1	1
chr7	248430	255849	Skin_Not_Sun_Exposed_Suprapubic	FAM20C	ENSG00000177706.8		chr7	241557	241580	GT	0.405057	3	1	1
chr6	31892910	31896263	Adipose_Subcutaneous	EHMT2	ENSG00000204371.11		chr6	31890874	31890893	GTTT	0.405742	2	0.811483	1
chr1	40997526	41001029	Muscle_Skeletal	CTPS1	ENSG00000171793.13		chr1	41000216	41000260	GTTTT	0.405822	3	1	1
chr1	99970162	99993537	Testis	SLC35A3	ENSG00000117620.14		chr1	99964542	99964583	AAC	0.40687	5	1	1
chr19	18222323	18224235	Artery_Tibial	PDE4C	ENSG00000105650.21		chr19	18221608	18221639	AAAC	0.407249	2	0.814498	1
chr14	103094840	103100204	Stomach	RP11-736N17.8	ENSG00000259444.1		chr14	103105359	103105382	GT	0.41206	8	1	1
chr19	44170095	44172088	Cells_EBV-transformed_lymphocytes	ZNF226	ENSG00000167380.16		chr19	44174140	44174165	GT	0.412164	5	1	1
chr14	67586097	67587074	Brain_Cerebellar_Hemisphere	PLEKHH1	ENSG00000054690.13		chr14	67581275	67581300	AC	0.412218	4	1	1
chr17	10844964	10847892	Colon_Transverse	TMEM220-AS1	ENSG00000263400.6		chr17	10857275	10857309	AAAAC	0.414668	4	1	1
chr17	10844964	10847892	Colon_Transverse	RP11-963H4.3	ENSG00000263508.5		chr17	10857275	10857309	AAAAC	0.414668	4	1	1
chr5	65567615	65569632	Testis	PPWD1	ENSG00000113593.11		chr5	65561598	65561619	GT	0.414995	3	1	1
chr5	81255214	81257733	Adrenal_Gland	CKMT2	ENSG00000131730.15		chr5	81257142	81257183	GT	0.415834	2	0.831667	1
chr5	81236122	81301287	Skin_Not_Sun_Exposed_Suprapubic	CKMT2-AS1	ENSG00000247572.7		chr5	81257142	81257183	GT	0.421442	3	1	1
chr5	139679940	139680364	Brain_Cerebellar_Hemisphere	UBE2D2	ENSG00000131508.15		chr5	139682325	139682354	AGCCCC	0.422074	2	0.844147	1
chr17	42969186	42970289	Muscle_Skeletal	AARSD1	ENSG00000266967.6		chr17	42971285	42971306	GT	0.422868	2	0.845737	1
chr1	65425378	65565546	Cells_Cultured_fibroblasts	LEPR	ENSG00000116678.19		chr1	65503797	65503832	AC	0.427276	2	0.854552	1
chr1	65425378	65565546	Cells_Cultured_fibroblasts	LEPROT	ENSG00000213625.8		chr1	65503797	65503832	AC	0.427276	2	0.854552	1
chr3	17233750	17238163	Muscle_Skeletal	TBC1D5	ENSG00000131374.14		chr3	17223901	17223930	GTTTT	0.429272	2	0.858545	1
chr2	232331926	232333840	Nerve_Tibial	DIS3L2	ENSG00000144535.19		chr2	232342097	232342118	GT	0.431585	3	1	1
chr1	41161432	41186121	Testis	SCMH1	ENSG00000010803.16		chr1	41192496	41192525	GT	0.431787	3	1	1
chr18	26659480	26703392	Minor_Salivary_Gland	KCTD1	ENSG00000134504.12		chr18	26665946	26665978	GTT	0.434827	2	0.869655	1
chr14	68925672	68978217	Cells_Cultured_fibroblasts	ACTN1	ENSG00000072110.13		chr14	68974553	68974574	GT	0.434991	2	0.869982	1
chr4	1012564	1022203	Brain_Cerebellar_Hemisphere	FGFRL1	ENSG00000127418.14		chr4	1025867	1025882	AC	0.439567	2	0.879134	1
chr11	107327053	107329918	Thyroid	CWF19L2	ENSG00000152404.15		chr11	107337368	107337409	AC	0.440875	2	0.881751	1
chr11	57399566	57409175	Adipose_Subcutaneous	SLC43A3	ENSG00000134802.17		chr11	57407666	57407691	AC	0.445475	3	1	1
chr11	88149955	88175183	Skin_Sun_Exposed_Lower_leg	RAB38	ENSG00000123892.11		chr11	88177485	88177516	ATTT	0.445735	2	0.89147	1
chr17	3731183	3732368	Testis	ITGAE	ENSG00000083457.11		chr17	3732078	3732089	GTTT	0.446483	2	0.892965	1
chr8	133030023	133095044	Skin_Not_Sun_Exposed_Suprapubic	TG	ENSG00000042832.11		chr8	133055825	133055872	AGC	0.449316	2	0.898631	1
chr19	578121	579500	Testis	BSG	ENSG00000172270.18		chr19	576963	576978	GT	0.450713	4	1	1
chr22	37066962	37068616	Pituitary	TMPRSS6	ENSG00000187045.16		chr22	37073347	37073394	ATCC	0.451826	3	1	1
chr17	40834519	40835962	Testis	TMEM99	ENSG00000167920.8		chr17	40844011	40844036	AC	0.452252	2	0.904503	1
chr20	63434435	63438625	Testis	KCNQ2	ENSG00000075043.18		chr20	63447600	63447614	AAAAC	0.457676	3	1	1
chr5	78632368	78648499	Testis	LHFPL2	ENSG00000145685.13		chr5	78625207	78625232	GT	0.459587	2	0.919175	1
chr8	142676208	142681705	Skin_Not_Sun_Exposed_Suprapubic	JRK	ENSG00000234616.8		chr8	142689703	142689724	AC	0.464147	5	1	1
chr7	135115611	135134841	Brain_Cerebellum	AGBL3	ENSG00000146856.14		chr7	135133068	135133099	AC	0.465172	2	0.930345	1
chr6	107030107	107039749	Thyroid	C6orf203	ENSG00000130349.9		chr6	107029014	107029038	GTTTT	0.466246	3	1	1
chr7	112206807	112286877	Cells_Cultured_fibroblasts	ZNF277	ENSG00000198839.9		chr7	112204883	112204908	GT	0.47142	2	0.94284	1
chr13	23295487	23320637	Heart_Left_Ventricle	SGCG	ENSG00000102683.7		chr13	23304998	23305015	AC	0.471849	2	0.943698	1
chr1	48761470	48773060	Brain_Hypothalamus	BEND5	ENSG00000162373.12		chr1	48763101	48763130	GTT	0.47223	3	1	1
chr15	84860072	84862635	Artery_Tibial	ALPK3	ENSG00000136383.6		chr15	84850880	84850915	AC	0.476611	2	0.953222	1
chr11	72585056	72587801	Whole_Blood	RP11-169D4.2	ENSG00000256633.1		chr11	72595036	72595067	GT	0.476632	2	0.953263	1
chr8	33597773	33599665	Brain_Cerebellar_Hemisphere	DUSP26	ENSG00000133878.8		chr8	33597883	33597910	GT	0.477023	3	1	1
chr21	45538008	45544137	Brain_Caudate_basal_ganglia	SLC19A1	ENSG00000173638.18		chr21	45541025	45541036	CTT	0.478233	3	1	1
chr5	151467925	151469246	Nerve_Tibial	SLC36A1	ENSG00000123643.12		chr5	151473175	151473226	AGAT	0.47954	2	0.959081	1
chr3	194588639	194604287	Adipose_Subcutaneous	TMEM44	ENSG00000145014.17		chr3	194612022	194612057	ATTT	0.481652	4	1	1
chr2	111248241	111344061	Cells_Cultured_fibroblasts	MIR4435-2HG	ENSG00000172965.14		chr2	111244688	111244729	GT	0.485314	2	0.970629	1
chr9	88535736	88544379	Testis	NXNL2	ENSG00000130045.15		chr9	88546149	88546176	NA	0.485776	5	1	1
chr11	113363927	113364835	Cells_Cultured_fibroblasts	TTC12	ENSG00000149292.16		chr11	113360052	113360076	GTTTT	0.487527	3	1	1
chr1	26306704	26318047	Whole_Blood	UBXN11	ENSG00000158062.20		chr1	26325611	26325638	GT	0.488044	2	0.976088	1
chr18	76565634	76610845	Prostate	LINC00908	ENSG00000263812.5		chr18	76566165	76566188	GTT	0.488083	2	0.976166	1
chr16	74632673	74644362	Skin_Sun_Exposed_Lower_leg	RFWD3	ENSG00000168411.13		chr16	74646904	74646936	GTT	0.488496	2	0.976992	1
chr7	124846998	124851872	Nerve_Tibial	POT1	ENSG00000128513.14		chr7	124846163	124846184	GT	0.489172	2	0.978343	1
chr15	42068941	42069279	Skin_Sun_Exposed_Lower_leg	PLA2G4D	ENSG00000159337.6		chr15	42066433	42066464	AC	0.491293	2	0.982586	1
chr5	135574685	135578434	Brain_Hippocampus	CXCL14	ENSG00000145824.12		chr5	135573710	135573741	GT	0.494896	2	0.989792	1
chr1	1419549	1420797	Adipose_Subcutaneous	ANKRD65	ENSG00000235098.8		chr1	1411995	1412045	ACCTAGATGGACCTGGG	0.495406	2	0.990812	1
chr21	41741997	41743882	Skin_Sun_Exposed_Lower_leg	RIPK4	ENSG00000183421.11		chr21	41733014	41733041	AC	0.498276	4	1	1
chr15	52109973	52112238	Esophagus_Mucosa	BCL2L10	ENSG00000137875.4		chr15	52112812	52112832	CCGGGGG	0.501136	2	1	1
chr20	50129690	50130052	Esophagus_Muscularis	TMEM189	ENSG00000240849.10		chr20	50120269	50120296	GTTT	0.503427	2	1	1
chr5	43015150	43067087	Cells_Cultured_fibroblasts	ANXA2R	ENSG00000177721.4		chr5	43064616	43064636	GTT	0.506011	2	1	1
chr5	43015150	43067087	Cells_Cultured_fibroblasts	CTD-2201E18.3	ENSG00000177738.3		chr5	43064616	43064636	GTT	0.506011	2	1	1
chr19	55162801	55164087	Testis	CTD-2587H24.5	ENSG00000267577.1		chr19	55169934	55169953	ATTT	0.506386	4	1	1
chr20	23394999	23395139	Artery_Tibial	NAPB	ENSG00000125814.17		chr20	23385712	23385738	CTCTTCTTT	0.510284	5	1	1
chr12	122274162	122278154	Heart_Atrial_Appendage	CLIP1	ENSG00000130779.19		chr12	122276383	122276404	GT	0.515052	5	1	1
chr1	22052742	22078429	Muscle_Skeletal	CDC42	ENSG00000070831.15		chr1	22051826	22051855	AAC	0.518425	2	1	1
chr3	149050375	149055303	Cells_Cultured_fibroblasts	HLTF	ENSG00000071794.15		chr3	149061414	149061443	ATTTT	0.521145	2	1	1
chr7	29064234	29066023	Brain_Cerebellar_Hemisphere	CPVL	ENSG00000106066.14		chr7	29069771	29069828	AC	0.523872	2	1	1
chr1	109173837	109188177	Pancreas	KIAA1324	ENSG00000116299.16		chr1	109182334	109182363	AAT	0.523931	2	1	1
chr19	48714045	48714366	Artery_Tibial	MAMSTR	ENSG00000176909.11		chr19	48711560	48711587	AAAC	0.524701	3	1	1
chr14	91873675	91877487	Cells_Cultured_fibroblasts	FBLN5	ENSG00000140092.14		chr14	91881121	91881154	GT	0.531998	4	1	1
chr11	134262622	134262770	Thyroid	ACAD8	ENSG00000151498.11		chr11	134267824	134267843	AC	0.534737	2	1	1
chr10	132835434	132836142	Brain_Substantia_nigra	CFAP46	ENSG00000171811.13		chr10	132831221	132831246	AC	0.537706	2	1	1
chr2	10754066	10757427	Skin_Sun_Exposed_Lower_leg	ATP6V1C2	ENSG00000143882.10		chr2	10754543	10754582	CTTTT	0.539742	4	1	1
chr17	63774376	63792412	Nerve_Tibial	DDX42	ENSG00000198231.12		chr17	63765121	63765154	GT	0.540739	3	1	1
chr17	50990668	50993764	Testis	SPAG9	ENSG00000008294.20		chr17	51000756	51000791	ATTT	0.541927	2	1	1
chr17	55414232	55421670	Skin_Sun_Exposed_Lower_leg	MMD	ENSG00000108960.7		chr17	55430507	55430536	AAAAC	0.542089	3	1	1
chr14	92513976	92555751	Lung	RIN3	ENSG00000100599.15		chr14	92518790	92518825	GT	0.542695	2	1	1
chr9	124353709	124356764	Brain_Caudate_basal_ganglia	PSMB7	ENSG00000136930.12		chr9	124350502	124350531	AC	0.543357	2	1	1
chr10	37776575	37803833	Adipose_Subcutaneous	ZNF248	ENSG00000198105.13		chr10	37773989	37774010	GT	0.545957	2	1	1
chr13	44436095	44437176	Lung	TSC22D1	ENSG00000102804.14		chr13	44431164	44431181	GT	0.54794	6	1	1
chr19	19039414	19042711	Brain_Cortex	ARMC6	ENSG00000105676.13		chr19	19038899	19038926	AC	0.548512	3	1	1
chr4	107910549	107978720	Brain_Hippocampus	RP11-286E11.1	ENSG00000245293.2		chr4	107955325	107955352	GT	0.551687	2	1	1
chr4	107910549	107978720	Brain_Hippocampus	RP11-286E11.2	ENSG00000249604.1		chr4	107955325	107955352	GT	0.551687	2	1	1
chr7	55521130	55572271	Testis	VOPP1	ENSG00000154978.12		chr7	55573865	55573892	GT	0.570095	2	1	1
chr4	188436900	188485779	Cells_Cultured_fibroblasts	LINC01060	ENSG00000249378.5		chr4	188463129	188463150	AC	0.57172	2	1	1
[truncated: 304 more rows]
