# Supplementary material for: Genome-wide identification of tandem repeats associated with splicing variation across 49 tissues in humans
Source: HighWire-hosted journal article supplement (doi:10.1101/gr.277335.122), 2023-03-01
Supplement: Supplemental_Table_S3.xlsx [file Supplemental_Table_S3.xlsx]

## Sheet: Table S3
Table S3 Results of RBP-binding site enrichment analyses using ENCODE data
TR location	RBP	Count in analyzed TRs	Median count in negative control datasets	Count in sTRs	Ratio	P-value	Q-value
Intron	TARDBP	469	166	231	1.39157	0	0
Intron	HNRNPL	763	250	290	1.16	0.0004	0.0072
Intron	EIF4G2	296	105	130	1.2381	0.0015	0.018
Intron	HNRNPM	48	15	24	1.6	0.0041	0.0369
Intron	BUD13	12	6	10	1.66667	0.0094	0.06768
Intron	GEMIN5	11	5	9	1.8	0.0136	0.0725143
Intron	DDX6	14	6	10	1.66667	0.0141	0.0725143
Intron	ZRANB2	21	9	14	1.55556	0.0166	0.0728
Intron	TBRG4	34	13	19	1.46154	0.0182	0.0728
Intron	KHSRP	91	34	44	1.29412	0.0213	0.07668
Intron	EFTUD2	32	15	21	1.4	0.0244	0.0798545
Intron	EXOSC5	57	18	25	1.38889	0.0342	0.101631
Intron	SF3B1	20	7	11	1.57143	0.0367	0.101631
Intron	SUPV3L1	15	6	10	1.66667	0.0466	0.119012
Intron	DROSHA	23	10	14	1.4	0.054	0.119012
Intron	DKC1	193	66	77	1.16667	0.0555	0.119012
Intron	IGF2BP1	51	18	24	1.33333	0.0562	0.119012
Intron	ILF3	23	8	12	1.5	0.0609	0.1218
Intron	GPKOW	11	5	8	1.6	0.0726	0.13338
Intron	XPO5	12	4	7	1.75	0.0741	0.13338
Intron	FAM120A	24	10	14	1.4	0.0792	0.135771
Intron	UTP3	7	3	5	1.66667	0.0821	NA
Intron	TIAL1	11	5	7	1.4	0.1091	0.178527
Intron	WDR3	2	1	2	2	0.1419	NA
Intron	NONO	10	4	6	1.5	0.1627	NA
Intron	SUGP2	39	12	15	1.25	0.1772	0.277357
Intron	MATR3	34	10	13	1.3	0.1991	0.29865
Intron	ZC3H11A	2	1	2	2	0.225	NA
Intron	NOLC1	2	1	2	2	0.2294	NA
Intron	SRSF1	2	1	2	2	0.2335	NA
Intron	GNL3	5	2	3	1.5	0.2481	NA
Intron	FXR2	2	1	2	2	0.2482	NA
Intron	CDC40	19	7	9	1.28571	0.2677	0.381185
Intron	FMR1	5	2	3	1.5	0.2708	NA
Intron	PRPF4	12	5	7	1.4	0.2753	0.381185
Intron	DDX21	4	2	3	1.5	0.2814	NA
Intron	U2AF2	9	4	5	1.25	0.291	NA
Intron	PRPF8	21	10	12	1.2	0.2939	0.391867
Intron	DHX30	9	4	5	1.25	0.2946	NA
Intron	CSTF2T	25	10	12	1.2	0.3061	0.393557
Intron	PCBP2	8	3	4	1.33333	0.3066	NA
Intron	SLTM	7	3	4	1.33333	0.3187	NA
Intron	HLTF	5	2	3	1.5	0.3287	NA
Intron	TROVE2	3	1	2	2	0.3341	NA
Intron	CPEB4	4	1	2	2	0.3394	NA
Intron	RBM22	7	3	4	1.33333	0.3526	NA
Intron	KHDRBS1	3	1	2	2	0.3565	NA
Intron	PCBP1	5	2	3	1.5	0.374	NA
Intron	WDR43	3	1	2	2	0.38	NA
Intron	AKAP1	1	0	1	Inf	0.3829	NA
Intron	AATF	14	6	7	1.16667	0.3871	0.480538
Intron	PABPC4	3	1	2	2	0.4102	NA
Intron	DDX55	4	1	2	2	0.4127	NA
Intron	DDX51	3	1	2	2	0.4441	NA
Intron	UCHL5	1	0	1	Inf	0.4475	NA
Intron	METAP2	1	0	1	Inf	0.4475	NA
Intron	YBX3	4	1	2	2	0.4504	NA
Intron	SRSF9	1	0	1	Inf	0.4559	NA
Intron	DDX24	1	0	1	Inf	0.4705	NA
Intron	HNRNPC	5	1	2	2	0.481	NA
Intron	GRSF1	1	0	1	Inf	0.4839	NA
Intron	IGF2BP3	1	0	1	Inf	0.4839	NA
Intron	SF3B4	5	2	3	1.5	0.4855	NA
Intron	EIF3D	2	1	1	1	0.4952	NA
Intron	PUM2	3	1	1	1	0.5328	NA
Intron	TIA1	9	4	4	1	0.5591	NA
Intron	TAF15	3	1	1	1	0.5647	NA
Intron	HNRNPUL1	24	8	8	1	0.5814	0.69768
Intron	DDX42	2	1	1	1	0.6058	NA
Intron	SRSF7	101	33	32	0.969697	0.6064	0.704206
Intron	STAU2	5	2	2	1	0.6143	NA
Intron	FASTKD2	5	2	2	1	0.636	NA
Intron	DDX52	10	4	4	1	0.6661	NA
Intron	RBM15	2	1	1	1	0.6763	NA
Intron	EIF3H	2	1	1	1	0.6781	NA
Intron	LARP4	8	3	3	1	0.7011	NA
Intron	NCBP2	8	3	3	1	0.7129	NA
Intron	SMNDC1	2	1	1	1	0.7169	NA
Intron	SND1	3	1	1	1	0.7314	NA
Intron	EWSR1	11	5	4	0.8	0.7357	0.8028
Intron	HNRNPU	4	1	1	1	0.7363	NA
Intron	AQR	18	9	8	0.888889	0.7532	0.8028
Intron	DGCR8	31	10	9	0.9	0.7582	0.8028
Intron	LSM11	3	1	1	1	0.7768	NA
Intron	SAFB2	4	1	1	1	0.7777	NA
Intron	FKBP4	3	1	1	1	0.8199	NA
Intron	UTP18	3	1	1	1	0.8206	NA
Intron	DDX3X	3	1	1	1	0.8319	NA
Intron	IGF2BP2	3	1	1	1	0.8386	NA
Intron	CSTF2	5	2	1	0.5	0.8797	NA
Intron	PTBP1	86	27	22	0.814815	0.9083	0.934251
Intron	QKI	30	9	4	0.444444	0.9955	0.9955
Intron	PPIG	1	0	0	Inf	1	NA
Intron	PUM1	1	0	0	Inf	1	NA
Intron	FXR1	0	0	0	Inf	1	NA
Intron	SAFB	2	1	0	0	1	NA
Intron	NIP7	0	0	0	Inf	1	NA
Intron	SLBP	1	0	0	Inf	1	NA
Intron	ZNF622	3	1	0	0	1	NA
Intron	LARP7	2	1	0	0	1	NA
Intron	SERBP1	0	0	0	Inf	1	NA
Intron	SF3A3	1	1	0	0	1	NA
Intron	APOBEC3C	0	0	0	Inf	1	NA
Intron	TRA2A	0	0	0	Inf	1	NA
Intron	RBM5	2	1	0	0	1	NA
Intron	LIN28B	1	0	0	Inf	1	NA
Intron	PUS1	1	0	0	Inf	1	NA
Intron	G3BP1	0	0	0	Inf	1	NA
Intron	U2AF1	1	0	0	Inf	1	NA
Intron	NOL12	0	0	0	Inf	1	NA
Intron	CPSF6	1	0	0	Inf	1	NA
Intron	BCCIP	2	1	0	0	1	NA
Exon	IGF2BP1	13	6	10	1.66667	0.024	0.24
Exon	METAP2	5	3	5	1.66667	0.027	NA
Exon	DDX6	7	3	6	2	0.035	NA
Exon	TARDBP	38	19	25	1.31579	0.035	0.315
Exon	YBX3	6	3	5	1.66667	0.047	NA
Exon	DKC1	25	12	16	1.33333	0.047	0.376
Exon	ILF3	2	1	2	2	0.083	NA
Exon	XPO5	3	1	3	3	0.084	NA
Exon	UCHL5	7	4	6	1.5	0.086	NA
Exon	DROSHA	7	4	6	1.5	0.086	NA
Exon	SRSF7	15	7	10	1.42857	0.092	0.644
Exon	LSM11	4	2	4	2	0.098	NA
Exon	DDX55	6	3	5	1.66667	0.102	NA
Exon	TBRG4	7	4	6	1.5	0.114	NA
Exon	AQR	3	2	3	1.5	0.143	NA
Exon	CSTF2T	5	2	4	2	0.148	NA
Exon	NCBP2	15	8	11	1.375	0.15	0.9
Exon	BUD13	5	2	4	2	0.153	NA
Exon	AKAP1	5	2	4	2	0.166	NA
Exon	EWSR1	3	2	3	1.5	0.169	NA
Exon	LIN28B	3	2	3	1.5	0.176	NA
Exon	FAM120A	8	4	6	1.5	0.182	NA
Exon	DDX24	2	1	2	2	0.184	NA
Exon	PCBP2	5	3	4	1.33333	0.219	NA
Exon	RBM22	2	1	2	2	0.221	NA
Exon	IGF2BP2	2	1	2	2	0.227	NA
Exon	LARP4	5	3	4	1.33333	0.229	NA
Exon	EFTUD2	7	4	5	1.25	0.268	NA
Exon	QKI	4	2	3	1.5	0.287	NA
Exon	DGCR8	4	2	3	1.5	0.288	NA
Exon	NOLC1	2	1	2	2	0.292	NA
Exon	SMNDC1	2	1	2	2	0.302	NA
Exon	EIF4G2	29	13	15	1.15385	0.334	1
Exon	RBM15	7	4	5	1.25	0.358	NA
Exon	TIAL1	1	0	1	Inf	0.389	NA
Exon	SRSF1	7	4	5	1.25	0.398	NA
Exon	FASTKD2	4	2	3	1.5	0.402	NA
Exon	IGF2BP3	1	0	1	Inf	0.418	NA
Exon	CDC40	5	2	3	1.5	0.443	NA
Exon	ZNF622	4	2	3	1.5	0.449	NA
Exon	PRPF4	6	3	4	1.33333	0.469	NA
Exon	UTP18	3	1	2	2	0.472	NA
Exon	NONO	3	1	2	2	0.472	NA
Exon	DDX52	3	1	2	2	0.475	NA
Exon	PABPC4	9	5	5	1	0.504	NA
Exon	PUM2	1	1	1	1	0.514	NA
Exon	GRSF1	1	1	1	1	0.521	NA
Exon	TAF15	1	1	1	1	0.53	NA
Exon	WDR43	1	1	1	1	0.534	NA
Exon	SF3B4	1	1	1	1	0.55	NA
Exon	EIF3D	8	4	4	1	0.552	NA
Exon	NIP7	1	1	1	1	0.552	NA
Exon	DDX51	1	1	1	1	0.56	NA
Exon	EXOSC5	3	2	2	1	0.573	NA
Exon	CPSF6	1	1	1	1	0.579	NA
Exon	DDX3X	29	15	15	1	0.588	1
Exon	SRSF9	3	2	2	1	0.615	NA
Exon	UTP3	6	3	3	1	0.618	NA
Exon	SND1	4	2	2	1	0.635	NA
Exon	HLTF	1	1	1	1	0.646	NA
Exon	SF3A3	1	1	1	1	0.651	NA
Exon	HNRNPL	41	20	19	0.95	0.663	1
Exon	AATF	2	1	1	1	0.675	NA
Exon	KHSRP	5	2	2	1	0.694	NA
Exon	DDX21	2	1	1	1	0.71	NA
Exon	EIF3H	12	7	6	0.857143	0.718	1
Exon	PPIG	8	4	4	1	0.731	NA
Exon	GEMIN5	17	9	8	0.888889	0.739	1
Exon	PCBP1	9	5	4	0.8	0.764	NA
Exon	APOBEC3C	5	2	2	1	0.766	NA
Exon	PRPF8	4	2	2	1	0.769	NA
Exon	TIA1	2	1	1	1	0.771	NA
Exon	SLTM	2	1	1	1	0.778	NA
Exon	PUM1	8	5	4	0.8	0.791	NA
Exon	U2AF1	2	1	1	1	0.797	NA
Exon	G3BP1	2	1	1	1	0.801	NA
Exon	NOL12	2	1	1	1	0.812	NA
Exon	BCCIP	3	1	1	1	0.831	NA
Exon	DDX42	3	2	1	0.5	0.872	NA
Exon	ZC3H11A	4	2	1	0.5	0.925	NA
Exon	FXR2	4	2	1	0.5	0.954	NA
Exon	DHX30	4	2	1	0.5	0.962	NA
Exon	PTBP1	4	2	1	0.5	0.969	NA
Exon	SF3B1	4	2	1	0.5	0.982	NA
Exon	LARP7	0	0	0	NA	1	NA
Exon	GNL3	0	0	0	NA	1	NA
Exon	WDR3	0	0	0	NA	1	NA
Exon	CSTF2	0	0	0	NA	1	NA
Exon	FXR1	1	1	0	0	1	NA
Exon	FKBP4	1	1	0	0	1	NA
Exon	TROVE2	1	1	0	0	1	NA
Exon	SLBP	1	0	0	NA	1	NA
Exon	TRA2A	1	0	0	NA	1	NA
Exon	HNRNPUL1	0	0	0	NA	1	NA
Exon	SUPV3L1	0	0	0	NA	1	NA
Exon	RBM5	0	0	0	NA	1	NA
Exon	MATR3	0	0	0	NA	1	NA
Exon	SUGP2	0	0	0	NA	1	NA
Exon	HNRNPM	3	2	0	0	1	NA
Exon	CPEB4	0	0	0	NA	1	NA
Exon	ZRANB2	0	0	0	NA	1	NA
Exon	PUS1	0	0	0	NA	1	NA
Exon	HNRNPU	0	0	0	NA	1	NA
Exon	SERBP1	2	1	0	0	1	NA
Exon	HNRNPC	0	0	0	NA	1	NA
Exon	GPKOW	1	0	0	NA	1	NA
Exon	FMR1	1	0	0	NA	1	NA
Exon	SAFB2	0	0	0	NA	1	NA
Exon	STAU2	0	0	0	NA	1	NA
Exon	U2AF2	1	1	0	0	1	NA
Exon	KHDRBS1	0	0	0	NA	1	NA
Exon	SAFB	0	0	0	NA	1	NA
