# Supplementary material for: Genome-wide identification of tandem repeats associated with splicing variation across 49 tissues in humans
Source: HighWire-hosted journal article supplement (doi:10.1101/gr.277335.122), 2023-03-01
Supplement: Supplemental_Table_S4.xlsx [file Supplemental_Table_S4.xlsx]

## Sheet: Table S4
Table S4 Results of RBP-binding site enrichment analyses using POSTAR2 data
TR location	RBP	Count in analyzed TRs	Median count in negative control datasets	Count in sTRs	Ratio	P-value	Q-value
Intron	HNRNPC	357	126	176	1.39683	0	0
Intron	TARDBP	2270	758	878	1.15831	0	0
Intron	ELAVL1	545	190	252	1.32632	0	0
Intron	CSTF2	322	110	141	1.28182	0	0
Intron	CSTF2T	500	172	222	1.2907	0	0
Intron	CPSF1	10	3	8	2.66667	0.0021	NA
Intron	ATXN2	112	41	56	1.36585	0.0026	0.00823333
Intron	PTBP1	42	13	22	1.69231	0.0041	0.0111286
Intron	CELF2	111	38	51	1.34211	0.0063	0.0149625
Intron	ALKBH5	3	1	3	3	0.0153	NA
Intron	CPSF4	5	2	4	2	0.0365	NA
Intron	U2AF2	51	17	23	1.35294	0.0396	0.0836
Intron	CPSF7	17	5	9	1.8	0.0467	0.08873
Intron	IGF2BP2	6	2	4	2	0.0889	NA
Intron	UPF1	5	2	4	2	0.105	NA
Intron	CPSF6	8	3	5	1.66667	0.1054	NA
Intron	LIN28B	15	5	8	1.6	0.1062	0.183436
Intron	HNRNPA1	22	7	10	1.42857	0.1171	0.185408
Intron	IGF2BP1	2	1	2	2	0.1333	NA
Intron	FIP1L1	71	23	28	1.21739	0.1375	0.200962
Intron	TAF15	11	3	5	1.66667	0.1644	0.223114
Intron	EIF3B	2	1	2	2	0.208	NA
Intron	SRSF1	16	5	7	1.4	0.2422	0.294856
Intron	WDR33	23	8	10	1.25	0.2483	0.294856
Intron	HNRNPF	1	0	1	Inf	0.3094	NA
Intron	HNRNPH1	7	2	3	1.5	0.3109	NA
Intron	FBL	7	2	3	1.5	0.3228	NA
Intron	HNRNPM	7	2	3	1.5	0.338	NA
Intron	STAU1	1	0	1	Inf	0.3464	NA
Intron	NOP56	14	5	6	1.2	0.3473	0.388159
Intron	IGF2BP3	4	1	2	2	0.3526	NA
Intron	EIF3D	3	1	2	2	0.3837	NA
Intron	YTHDF2	7	3	4	1.33333	0.4119	NA
Intron	EIF3A	1	0	1	Inf	0.4311	NA
Intron	TIA1	1	0	1	Inf	0.4409	NA
Intron	SRRM4	6	2	3	1.5	0.4461	NA
Intron	EIF3G	6	2	3	1.5	0.453	NA
Intron	FMR1	5	1	2	2	0.4836	NA
Intron	CAPRIN1	1	1	1	1	0.5004	NA
Intron	CPSF3	9	4	4	1	0.5225	NA
Intron	NOP58	2	1	1	1	0.551	NA
Intron	RTCB	2	1	1	1	0.5685	NA
Intron	MOV10	4	2	2	1	0.5778	NA
Intron	NUDT21	16	6	6	1	0.6193	0.653706
Intron	DDX3X	2	1	1	1	0.6473	NA
Intron	HNRNPD	6	2	2	1	0.6598	NA
Intron	TIAL1	2	1	1	1	0.6644	NA
Intron	QKI	6	2	2	1	0.6685	NA
Intron	HNRNPU	9	2	2	1	0.6925	NA
Intron	LIN28A	4	1	1	1	0.7453	NA
Intron	ZC3H7B	3	1	1	1	0.8349	NA
Intron	FUS	51	14	11	0.785714	0.8571	0.8571
Intron	YTHDC1	4	2	1	0.5	0.9239	NA
Intron	YTHDF1	0	0	0	NA	1	NA
Intron	YTHDC2	1	1	0	0	1	NA
Intron	CNBP	2	0	0	NA	1	NA
Intron	EIF4A3	0	0	0	NA	1	NA
Intron	EWSR1	6	2	0	0	1	NA
Intron	TNRC6C	1	0	0	NA	1	NA
Intron	TNRC6B	1	0	0	NA	1	NA
Intron	RBPMS	2	0	0	NA	1	NA
Intron	FXR1	0	0	0	NA	1	NA
Intron	MBNL2	6	1	0	0	1	NA
Intron	TARBP2	0	0	0	NA	1	NA
Intron	NCBP3	1	0	0	NA	1	NA
Intron	PUM2	1	0	0	NA	1	NA
Intron	RBM10	2	0	0	NA	1	NA
Intron	RBM15	1	0	0	NA	1	NA
Intron	RBM15B	2	1	0	0	1	NA
Intron	RBM47	1	0	0	NA	1	NA
Intron	TNRC6A	1	0	0	NA	1	NA
Exon	LIN28B	14	8	12	1.5	0.016	0.192
Exon	CSTF2T	56	27	33	1.22222	0.04	0.44
Exon	FIP1L1	17	9	13	1.44444	0.046	0.46
Exon	FMR1	4	2	4	2	0.062	NA
Exon	MOV10	6	3	5	1.66667	0.086	NA
Exon	ATXN2	65	30	35	1.16667	0.098	0.882
Exon	UPF1	21	10	13	1.3	0.101	0.882
Exon	IGF2BP3	11	6	8	1.33333	0.108	0.882
Exon	ZC3H7B	6	3	5	1.66667	0.116	NA
Exon	IGF2BP1	6	3	5	1.66667	0.153	NA
Exon	PTBP1	7	3	5	1.66667	0.158	NA
Exon	IGF2BP2	8	4	6	1.5	0.159	NA
Exon	YTHDC1	7	3	5	1.66667	0.165	NA
Exon	FBL	3	2	3	1.5	0.165	NA
Exon	SRSF1	2	1	2	2	0.171	NA
Exon	YTHDF2	9	5	7	1.4	0.181	NA
Exon	TARDBP	160	77	82	1.06494	0.198	1
Exon	CELF2	14	6	8	1.33333	0.243	1
Exon	CSTF2	46	22	24	1.09091	0.283	1
Exon	ELAVL1	49	25	27	1.08	0.331	1
Exon	RBPMS	2	1	2	2	0.334	NA
Exon	HNRNPU	2	1	2	2	0.35	NA
Exon	PUM2	2	1	2	2	0.356	NA
Exon	NUDT21	6	3	4	1.33333	0.366	NA
Exon	EWSR1	2	1	2	2	0.4	NA
Exon	HNRNPC	24	11	12	1.09091	0.478	1
Exon	FUS	6	3	4	1.33333	0.489	NA
Exon	CPSF1	1	0	1	Inf	0.493	NA
Exon	CPSF3	1	0.5	1	2	0.5	NA
Exon	CPSF6	5	3	3	1	0.505	NA
Exon	WDR33	2	1	1	1	0.507	NA
Exon	CPSF7	5	3	3	1	0.545	NA
Exon	EIF4A3	1	1	1	1	0.558	NA
Exon	TIA1	1	1	1	1	0.581	NA
Exon	HNRNPH1	1	1	1	1	0.611	NA
Exon	TNRC6B	1	1	1	1	0.632	NA
Exon	HNRNPD	1	1	1	1	0.632	NA
Exon	NCBP3	1	1	1	1	0.632	NA
Exon	YTHDF1	4	2	2	1	0.632	NA
Exon	TNRC6A	1	1	1	1	0.632	NA
Exon	TAF15	1	1	1	1	0.632	NA
Exon	TNRC6C	1	1	1	1	0.632	NA
Exon	FXR1	1	1	1	1	0.632	NA
Exon	QKI	1	1	1	1	0.632	NA
Exon	HNRNPA1	4	2	2	1	0.663	NA
Exon	SRRM4	4	2	2	1	0.71	NA
Exon	U2AF2	6	3	3	1	0.727	NA
Exon	NOP56	2	1	1	1	0.751	NA
Exon	CAPRIN1	2	1	1	1	0.789	NA
Exon	EIF3B	2	1	1	1	0.799	NA
Exon	TIAL1	2	1	1	1	0.807	NA
Exon	EIF3A	2	1	1	1	0.81	NA
Exon	MBNL2	3	1	1	1	0.816	NA
Exon	DDX3X	12	6	5	0.833333	0.832	1
Exon	LIN28A	5	3	1	0.333333	0.978	NA
Exon	RTCB	0	0	0	NA	1	NA
Exon	TARBP2	0	0	0	NA	1	NA
Exon	RBM47	0	0	0	NA	1	NA
Exon	RBM15B	1	0	0	NA	1	NA
Exon	RBM15	1	1	0	0	1	NA
Exon	RBM10	0	0	0	NA	1	NA
Exon	NOP58	0	0	0	NA	1	NA
Exon	HNRNPM	1	0	0	NA	1	NA
Exon	HNRNPF	0	0	0	NA	1	NA
Exon	EIF3G	1	1	0	0	1	NA
Exon	EIF3D	1	1	0	0	1	NA
Exon	CPSF4	1	1	0	0	1	NA
Exon	YTHDC2	0	0	0	NA	1	NA
Exon	CNBP	0	0	0	NA	1	NA
Exon	STAU1	0	0	0	NA	1	NA
Exon	ALKBH5	0	0	0	NA	1	NA
