# Supplementary material for: Genome-wide identification of tandem repeats associated with splicing variation across 49 tissues in humans
Source: HighWire-hosted journal article supplement (doi:10.1101/gr.277335.122), 2023-03-01
Supplement: Supplemental_Table_S5.xlsx [file Supplemental_Table_S5.xlsx]

## Sheet: Table S5
Table S5 Results of motif enrichment analyses
Repeat motif	Count in analyzed TRs	Median count in negative control datasets	Count in sTRs	Ratio	P-value	Q-value
GTTT	780	262	317	1.20992	0	0
ATTT	583	192	230	1.19792	0.0003	0.00795
GTTTT	480	155	186	1.2	0.00111	0.01961
CTTTT	76	24	36	1.5	0.00244	0.026288
GTT	434	139	166	1.19424	0.00248	0.026288
AATG	144	43	56	1.30233	0.0115	0.101583
AAAAT	58	19	27	1.42105	0.01685	0.127579
AAAAC	270	86	101	1.17442	0.02225	0.147406
ACCC	3	1	3	3	0.02899	NA
AGCCCC	6	2	5	2.5	0.0365	NA
AAAT	476	154	171	1.11039	0.05139	0.283309
CGGTG	1	0	1	Inf	0.05238	NA
AAT	103	33	41	1.24242	0.05638	0.283309
AAAC	551	170	187	1.1	0.0588	0.283309
CCTCT	7	3	5	1.66667	0.06902	NA
AGGCGG	3	1	3	3	0.08232	NA
AACAT	4	1	3	3	0.08233	NA
CCTGT	4	1	3	3	0.08559	NA
CTTGT	4	1	3	3	0.09184	NA
GGTTT	8	3	5	1.66667	0.09565	NA
ATATCT	11	3	5	1.66667	0.10468	0.462337
CTGTG	2	1	2	2	0.11212	NA
ATTC	190	60	68	1.13333	0.12068	0.492003
GTGTT	8	2	4	2	0.1278	NA
ACGC	2	1	2	2	0.14588	NA
AAC	269	77	85	1.1039	0.15536	0.588149
ATGT	95	30	35	1.16667	0.16848	0.595296
AAAG	62	19	23	1.21053	0.18289	0.605823
ACAGC	1	0	1	Inf	0.19504	NA
AATACT	2	1	2	2	0.20168	NA
AGGGTT	3	1	2	2	0.21364	NA
AGAGC	1	0	1	Inf	0.22116	NA
CCCTG	2	1	2	2	0.23648	NA
ACC	19	6	8	1.33333	0.25429	0.714801
ATG	77	25	28	1.12	0.26084	0.714801
AACGG	1	0	1	Inf	0.26614	NA
AGTTTT	1	0	1	Inf	0.27569	NA
ATT	80	26	29	1.11538	0.27754	0.714801
GGT	19	6	8	1.33333	0.28462	0.714801
GGTT	24	8	10	1.25	0.28604	0.714801
GTTTTT	5	2	3	1.5	0.28929	NA
CGTT	1	0	1	Inf	0.29279	NA
GGTTTT	1	0	1	Inf	0.29367	NA
AATACC	1	0	1	Inf	0.29607	NA
CTCTT	13	5	6	1.2	0.29671	0.714801
AGTGTT	1	0	1	Inf	0.29677	NA
ACACTC	1	0	1	Inf	0.29958	NA
ATTCCT	1	0	1	Inf	0.29978	NA
AGAGGCAGG	1	0	1	Inf	0.30315	NA
ACGCCTCCC	1	0	1	Inf	0.31511	NA
ACGGAGC	1	0	1	Inf	0.31553	NA
ACTAG	1	0	1	Inf	0.3168	NA
AAAAG	55	18	20	1.11111	0.33359	0.765276
GTTTTTT	1	0	1	Inf	0.34479	NA
CTG	28	10	11	1.1	0.34654	0.765276
CCCCT	2	0	1	Inf	0.34872	NA
CTCTTCTTT	1	0	1	Inf	0.35437	NA
ACACTGGT	1	0	1	Inf	0.35529	NA
CGTTG	1	0	1	Inf	0.38188	NA
CTTT	102	32	34	1.0625	0.38267	0.81126
ACAGTGGC	1	0	1	Inf	0.39313	NA
AGGGGC	2	0	1	Inf	0.39359	NA
AGGGGGC	1	0	1	Inf	0.39498	NA
AGGAGGTGG	1	0	1	Inf	0.39618	NA
ACACAGCTTGT	1	0	1	Inf	0.39644	NA
CCCTCCTT	1	0	1	Inf	0.39896	NA
CCG	5	2	3	1.5	0.40276	NA
AAGAAGGTGGTCTCTGGG	1	0	1	Inf	0.40483	NA
ATGTG	1	0	1	Inf	0.42073	NA
CCCCCTCTTG	1	0	1	Inf	0.42084	NA
CCTTCT	1	0	1	Inf	0.42239	NA
ATCCTTGGC	1	0	1	Inf	0.42286	NA
ATCCCCCC	1	0	1	Inf	0.42421	NA
AACCT	1	0	1	Inf	0.42624	NA
AGTC	1	0	1	Inf	0.42716	NA
CTTG	9	2	3	1.5	0.42999	NA
AT	165	50	51	1.02	0.43194	0.880493
AACT	6	1	2	2	0.43592	NA
AAGGAGGG	1	0	1	Inf	0.44364	NA
CCTG	6	1	2	2	0.44512	NA
AGGGCCC	1	0	1	Inf	0.44586	NA
CCCCTG	1	0	1	Inf	0.44643	NA
AAG	22	8	9	1.125	0.4501	0.88353
AATTT	3	0	1	Inf	0.45054	NA
CGGCGGG	1	0	1	Inf	0.45249	NA
CCGG	1	0	1	Inf	0.45482	NA
AGAGGC	1	0	1	Inf	0.4551	NA
CCTCCTG	1	0	1	Inf	0.45624	NA
AGGTGG	1	0	1	Inf	0.45719	NA
AAATG	2	0	1	Inf	0.45961	NA
ACCATGTCGTGCCATTGC	1	0	1	Inf	0.46361	NA
AGTGG	1	0	1	Inf	0.46519	NA
ACTTCCCATGCCC	1	0	1	Inf	0.46531	NA
ATCTCT	2	0	1	Inf	0.46721	NA
AAATCTCGTTAAATG	1	0	1	Inf	0.46906	NA
ATGTGTGT	1	0	1	Inf	0.46995	NA
AGG	13	4	5	1.25	0.47008	0.889794
AGGGGCGG	1	0	1	Inf	0.47027	NA
AATGGCACTGCCAGGC	1	0	1	Inf	0.47114	NA
AGTTT	3	0	1	Inf	0.47428	NA
AAACTAGACCATAGG	1	0	1	Inf	0.47516	NA
ATGTCT	1	0	1	Inf	0.47543	NA
CCCGCTCT	1	0	1	Inf	0.47544	NA
AATTGGGCAG	1	0	1	Inf	0.47909	NA
CCTGCTCT	1	0	1	Inf	0.4848	NA
AAATTCTGATGTGTACT	1	0	1	Inf	0.48551	NA
AACCCT	2	0	1	Inf	0.48727	NA
CCCTTCCT	2	0	1	Inf	0.49348	NA
CGGTGG	1	0	1	Inf	0.49687	NA
CCTGG	1	0	1	Inf	0.49811	NA
AGCAGTGC	1	0	1	Inf	0.49842	NA
CGGCGGGG	1	0	1	Inf	0.49858	NA
CG	1	0	1	Inf	0.49863	NA
CGGGGTG	1	0	1	Inf	0.49872	NA
AGGGTC	1	0	1	Inf	0.49918	NA
CGGGGCTG	1	1	1	1	0.50022	NA
ACTGGGTGGG	1	1	1	1	0.5004	NA
ACAGGAGAGGGG	1	1	1	1	0.50098	NA
AGGTGGGGCTG	1	1	1	1	0.50101	NA
CCCCGG	2	1	1	1	0.50113	NA
ACTCCAGGTGTCCAGG	1	1	1	1	0.50124	NA
CCGGGGCT	1	1	1	1	0.50173	NA
CCCTCGCT	1	1	1	1	0.50182	NA
CCGCG	1	1	1	1	0.50243	NA
ACCTCTCCCCCTGCCCC	1	1	1	1	0.50389	NA
AGCC	2	1	1	1	0.51243	NA
AGGT	5	2	2	1	0.5211	NA
ATTTC	3	1	1	1	0.52841	NA
ACT	7	3	3	1	0.53736	NA
AACC	6	2	2	1	0.54291	NA
ATGATT	2	1	1	1	0.56179	NA
ATGG	77	25	25	1	0.56635	0.954676
CGGGG	4	2	2	1	0.5836	NA
AAACC	3	1	1	1	0.58501	NA
GGGT	2	1	1	1	0.5863	NA
GGTGT	2	1	1	1	0.59138	NA
CCT	18	6	6	1	0.59615	0.954676
AGAGGGG	2	1	1	1	0.60059	NA
ATGTT	22	7	7	1	0.60821	0.954676
CCTCTG	2	1	1	1	0.61002	NA
AATC	20	7	7	1	0.61168	0.954676
ATTG	42	13	13	1	0.61417	0.954676
AGTT	4	2	2	1	0.6251	NA
AGGTGGG	2	1	1	1	0.63187	NA
CCCTCT	6	2	2	1	0.63553	NA
AGAGGG	18	6	6	1	0.65077	0.954676
ATCC	81	24	23	0.958333	0.65561	0.954676
AGC	15	4	4	1	0.66394	0.954676
CTGG	2	1	1	1	0.67122	NA
ATGTGT	3	1	1	1	0.67128	NA
AGTG	10	3	3	1	0.6723	NA
ATATGT	7	2	2	1	0.67445	NA
CCCCG	2	1	1	1	0.68348	NA
AAAAAC	6	2	2	1	0.68936	NA
AAGC	3	1	1	1	0.69338	NA
AACAC	2	1	1	1	0.69867	NA
ACCT	3	1	1	1	0.70556	NA
ATTTT	89	29	27	0.931034	0.71214	0.954676
ACAT	68	21	19	0.904762	0.7132	0.954676
AAAGG	3	1	1	1	0.715	NA
AGTAT	3	1	1	1	0.71665	NA
AGGG	16	4	4	1	0.71799	0.954676
CTT	26	8	7	0.875	0.72051	0.954676
GGGGT	2	1	1	1	0.73012	NA
AACATG	2	1	1	1	0.74338	NA
ACCCC	2	1	1	1	0.74906	NA
CGTG	3	1	1	1	0.75122	NA
CGG	3	1	1	1	0.78612	NA
ATTGT	12	4	3	0.75	0.80093	0.99999
ACAG	7	1	1	1	0.82453	NA
CTGTT	4	1	1	1	0.83502	NA
CCTT	88	27	23	0.851852	0.84514	0.99999
ATC	65	18	15	0.833333	0.84878	0.99999
AATAG	7	2	1	0.5	0.88281	NA
CTGT	14	3	2	0.666667	0.90519	0.99999
AGT	6	2	1	0.5	0.91082	NA
CCCT	32	12	9	0.75	0.9159	0.99999
AAGG	55	17	13	0.764706	0.91772	0.99999
AATAC	5	2	1	0.5	0.93048	NA
ATTCT	12	4	2	0.5	0.93773	0.99999
AG	359	109	97	0.889908	0.93822	0.99999
AATT	7	2	1	0.5	0.95658	NA
AGATAT	9	3	1	0.333333	0.96159	NA
ACTC	9	3	1	0.333333	0.9777	NA
CT	346	104	87	0.836538	0.98499	0.99999
GT	6045	1887	1799	0.953365	0.99915	0.99999
AGAT	251	77	51	0.662338	0.99995	0.99999
AC	4388	1326	1222	0.921569	0.99998	0.99999
ATCT	287	83	51	0.614458	0.99999	0.99999
AGGGTGG	1	0	0	Inf	1	NA
ACAGCCACCGCTGTTCT	1	0	0	Inf	1	NA
CCTCTT	2	1	0	0	1	NA
AGGGAT	2	1	0	0	1	NA
AAGGCAGAGTGCAGGCCG	1	0	0	Inf	1	NA
CCTTCCTTT	1	0	0	Inf	1	NA
AAGGT	1	0	0	Inf	1	NA
CGGCTGGG	1	0	0	Inf	1	NA
ACACCTCCCCTCC	1	0	0	Inf	1	NA
ACACTGCTTCTGC	1	0	0	Inf	1	NA
AATGG	3	1	0	0	1	NA
ACTTCAGGTT	1	0	0	Inf	1	NA
CCGCCTGCCT	1	0	0	Inf	1	NA
CCGCTT	1	0	0	Inf	1	NA
AACCTCTGCCTCCCTGC	1	0	0	Inf	1	NA
CCTTT	1	0	0	Inf	1	NA
AGTGCATGG	1	0	0	Inf	1	NA
AGCCCGC	1	0	0	Inf	1	NA
AGTGGCTG	1	0	0	Inf	1	NA
AAACGTTGAGTCAAATGCC	1	0	0	Inf	1	NA
AATCC	1	0	0	Inf	1	NA
ATATG	2	0	0	Inf	1	NA
AGCTG	1	0	0	Inf	1	NA
CCCTCTCT	1	0	0	Inf	1	NA
ACAGCTCCAGCAGC	1	0	0	Inf	1	NA
ACCTGGTCTCCCC	1	0	0	Inf	1	NA
CCCTT	2	1	0	0	1	NA
CCCTGG	1	0	0	Inf	1	NA
CTTTG	1	0	0	Inf	1	NA
CCGGG	1	0	0	Inf	1	NA
AGCCCCCTGCCCGCC	1	0	0	Inf	1	NA
ACCCACCTACTCTCCCGC	1	0	0	Inf	1	NA
ACACGCGTCCCCAGGC	1	0	0	Inf	1	NA
CCCCTT	1	0	0	Inf	1	NA
ACATAT	4	1	0	0	1	NA
AGATCT	1	0	0	Inf	1	NA
AAACT	2	0	0	Inf	1	NA
CCCGGCTGT	1	0	0	Inf	1	NA
ATCCC	2	1	0	0	1	NA
AGGGGATG	1	0	0	Inf	1	NA
ACAGAG	1	0	0	Inf	1	NA
AGATG	1	0	0	Inf	1	NA
AGTCT	1	0	0	Inf	1	NA
ACATCTT	1	0	0	Inf	1	NA
AAGT	3	1	0	0	1	NA
AATTG	1	0	0	Inf	1	NA
AACCCC	1	0	0	Inf	1	NA
CCTGCT	1	0	0	Inf	1	NA
ACTGCTGCT	1	0	0	Inf	1	NA
AGCCCCTCGGCCCGCGGC	1	0	0	Inf	1	NA
CCCCGCTCCTCCT	1	0	0	Inf	1	NA
ACATGCATTG	1	0	0	Inf	1	NA
AGATT	1	0	0	Inf	1	NA
ATGGTGTG	1	0	0	Inf	1	NA
AAAAAG	1	0	0	Inf	1	NA
ACAGGGTTAGGTTGTGTG	1	0	0	Inf	1	NA
CCCGCCTT	1	0	0	Inf	1	NA
CCCCTGCTG	1	0	0	Inf	1	NA
ATATC	2	0	0	Inf	1	NA
ACCACCCCC	1	0	0	Inf	1	NA
ACTCTCCCTC	1	0	0	Inf	1	NA
AAGTAT	1	0	0	Inf	1	NA
CCCTGT	1	0	0	Inf	1	NA
AAGGG	3	0	0	Inf	1	NA
ACAGGG	1	0	0	Inf	1	NA
CTGTGT	1	0	0	Inf	1	NA
AGAGG	1	0	0	Inf	1	NA
ATCATG	1	0	0	Inf	1	NA
AAGGTGGCGTTTCTGAG	1	0	0	Inf	1	NA
AAGAT	2	1	0	0	1	NA
AGGGGTGC	1	0	0	Inf	1	NA
ACCTGCCCCGTGCCTCCTC	1	0	0	Inf	1	NA
AAATT	1	0	0	Inf	1	NA
CCCCTTGCG	1	1	0	0	1	NA
AGGC	3	1	0	0	1	NA
ACCAGT	1	0	0	Inf	1	NA
ACGGCCGCCCCATCCC	1	0	0	Inf	1	NA
ATGTGTC	1	0	0	Inf	1	NA
GGGTGTT	1	0	0	Inf	1	NA
ACCATC	1	0	0	Inf	1	NA
ACCAG	1	0	0	Inf	1	NA
AAGGTGGGAGGCC	1	0	0	Inf	1	NA
ACTGCAGGGG	1	0	0	Inf	1	NA
AAGGTTGCTTGCACG	1	0	0	Inf	1	NA
CTGGGG	4	1	0	0	1	NA
ACCAT	1	0	0	Inf	1	NA
ATCCTT	1	0	0	Inf	1	NA
CCTGTG	1	0	0	Inf	1	NA
AGCCAGGG	1	0	0	Inf	1	NA
CCGCCTT	1	0	0	Inf	1	NA
ATGTTG	2	1	0	0	1	NA
ATCCTTCC	1	0	0	Inf	1	NA
AATGT	1	0	0	Inf	1	NA
AATCAT	3	0	0	Inf	1	NA
CTCTGG	1	0	0	Inf	1	NA
ATTTG	2	1	0	0	1	NA
AAGAGG	1	0	0	Inf	1	NA
AGGGTG	1	0	0	Inf	1	NA
ATCATT	1	0	0	Inf	1	NA
CGGG	2	1	0	0	1	NA
ATTTTT	1	0	0	Inf	1	NA
AGGTTGG	1	0	0	Inf	1	NA
AAGCTGCCTATAGTGTATG	1	0	0	Inf	1	NA
CTGGG	4	2	0	0	1	NA
ACAGGACCCAGGAGCAGG	1	0	0	Inf	1	NA
ACCTGGATGCCC	1	0	0	Inf	1	NA
ACTAT	1	0	0	Inf	1	NA
CGGGGTGG	1	0	0	Inf	1	NA
AACAG	2	0	0	Inf	1	NA
ACGTG	1	0	0	Inf	1	NA
AAAGGAGGG	1	0	0	Inf	1	NA
AGGCGGG	1	0	0	Inf	1	NA
AACAAT	1	0	0	Inf	1	NA
AAGTGAT	1	0	0	Inf	1	NA
AAGAG	1	0	0	Inf	1	NA
AACTCCCTCACTATCACGAG	1	0	0	Inf	1	NA
AGCCCCC	2	1	0	0	1	NA
GGTGTT	1	0	0	Inf	1	NA
AGCAT	1	0	0	Inf	1	NA
AAGGAT	1	0	0	Inf	1	NA
ACTCC	1	0	0	Inf	1	NA
CTTTTT	1	0	0	Inf	1	NA
