# Supplementary material for: Genome-wide identification of tandem repeats associated with splicing variation across 49 tissues in humans
Source: HighWire-hosted journal article supplement (doi:10.1101/gr.277335.122), 2023-03-01
Supplement: Supplemental_Table_S6.xlsx [file Supplemental_Table_S6.xlsx]

## Sheet: Table S6
Table S6 Spl-TRs bound by RBPs in-silico predicted to bind the repeat motif
Splicing						Tandem repeat				RBP (CLIP-seq)		RBP (in silico)		Splicing and tandem repeat size association			Splicing and RBP expression assocaition
Chr	Start	End	Tissue	Gene		Chr	Start	End	motif	ENCODE	POSTAR2	SpliceAid	ATtRACT	P-value	Q-value		RBP	P-value	Correlation coefficient
chr8	41655753	41661801	Heart_Atrial_Appendage	ANK1		chr8	41655130	41655153	AC	;HNRNPL;FAM120A;IGF2BP2	;YTHDF2	HNRNPL;YBX1	HNRNPL;HNRNPLL;IGF2BP2;IGF2BP3	1.40619e-10	3.41704e-06		HNRNPL	0.059364	-0.0810032
chr8	41655753	41661801	Heart_Atrial_Appendage	ANK1		chr8	41655130	41655153	AC	;HNRNPL;FAM120A;IGF2BP2	;YTHDF2	HNRNPL;YBX1	HNRNPL;HNRNPLL;IGF2BP2;IGF2BP3	1.40619e-10	3.41704e-06		IGF2BP2	0.0976858	-0.0711908
chr1	161222994	161223350	Liver	APOA2		chr1	161223056	161223093	GT	;DKC1;PPIG;AQR;SRSF7;EFTUD2;BUD13;LSM11	;EFTUD2;LSM11;RBM15;TARDBP	TARDBP;NOVA1;CELF2;CELF1	CELF1;CELF2;CELF4;CELF5;KHSRP;NOVA1;RBM24;TARDBP	4.09993e-40	7.84325e-34		TARDBP	0.10745	0.117909
chr19	41432408	41433272	Brain_Cerebellar_Hemisphere	ATP5SL		chr19	41432784	41432817	AC	;HNRNPL	;AGGF1;TARDBP;UPF1	HNRNPL;YBX1	HNRNPL;HNRNPLL;IGF2BP2;IGF2BP3	5.33797e-09	7.20149e-05		HNRNPL	0.503868	0.0569328
chr19	41432408	41433272	Heart_Atrial_Appendage	ATP5SL		chr19	41432784	41432817	AC	;HNRNPL	;AGGF1;TARDBP;UPF1	HNRNPL;YBX1	HNRNPL;HNRNPLL;IGF2BP2;IGF2BP3	7.81987e-17	1.98142e-12		HNRNPL	0.0454713	-0.114529
chr19	41432408	41433537	Colon_Sigmoid	ATP5SL		chr19	41432784	41432817	AC	;HNRNPL	;AGGF1;TARDBP;UPF1	HNRNPL;YBX1	HNRNPL;HNRNPLL;IGF2BP2;IGF2BP3	6.70588e-12	6.67378e-08		HNRNPL	0.397268	-0.0506875
chr19	41432408	41433537	Colon_Transverse	ATP5SL		chr19	41432784	41432817	AC	;HNRNPL	;AGGF1;TARDBP;UPF1	HNRNPL;YBX1	HNRNPL;HNRNPLL;IGF2BP2;IGF2BP3	1.54139e-09	1.09496e-05		HNRNPL	0.247786	0.0643689
chr19	41432408	41433537	Liver	ATP5SL		chr19	41432784	41432817	AC	;HNRNPL	;AGGF1;TARDBP;UPF1	HNRNPL;YBX1	HNRNPL;HNRNPLL;IGF2BP2;IGF2BP3	1.92194e-06	0.00809662		HNRNPL	0.715906	0.0284919
chr19	41432408	41433537	Pancreas	ATP5SL		chr19	41432784	41432817	AC	;HNRNPL	;AGGF1;TARDBP;UPF1	HNRNPL;YBX1	HNRNPL;HNRNPLL;IGF2BP2;IGF2BP3	6.10303e-12	9.71519e-08		HNRNPL	0.278679	0.0664746
chr19	41432408	41433537	Stomach	ATP5SL		chr19	41432784	41432817	AC	;HNRNPL	;AGGF1;TARDBP;UPF1	HNRNPL;YBX1	HNRNPL;HNRNPLL;IGF2BP2;IGF2BP3	4.75253e-08	0.000298815		HNRNPL	0.0624188	0.108112
chr19	41432408	41433537	Adipose_Subcutaneous	ATP5SL		chr19	41432784	41432817	AC	;HNRNPL	;AGGF1;TARDBP;UPF1	HNRNPL;YBX1	HNRNPL;HNRNPLL;IGF2BP2;IGF2BP3	3.5768e-16	1.75585e-12		HNRNPL	0.341373	0.0410065
chr19	41432408	41433537	Adipose_Visceral_Omentum	ATP5SL		chr19	41432784	41432817	AC	;HNRNPL	;AGGF1;TARDBP;UPF1	HNRNPL;YBX1	HNRNPL;HNRNPLL;IGF2BP2;IGF2BP3	4.1161e-15	3.71152e-11		HNRNPL	0.00810649	0.125436
chr19	41432408	41433537	Adrenal_Gland	ATP5SL		chr19	41432784	41432817	AC	;HNRNPL	;AGGF1;TARDBP;UPF1	HNRNPL;YBX1	HNRNPL;HNRNPLL;IGF2BP2;IGF2BP3	4.753e-08	0.000426637		HNRNPL	0.902165	0.00852931
chr19	41432408	41433537	Artery_Aorta	ATP5SL		chr19	41432784	41432817	AC	;HNRNPL	;AGGF1;TARDBP;UPF1	HNRNPL;YBX1	HNRNPL;HNRNPLL;IGF2BP2;IGF2BP3	4.41532e-12	2.86324e-08		HNRNPL	0.119181	-0.0831883
chr19	41432408	41433537	Artery_Coronary	ATP5SL		chr19	41432784	41432817	AC	;HNRNPL	;AGGF1;TARDBP;UPF1	HNRNPL;YBX1	HNRNPL;HNRNPLL;IGF2BP2;IGF2BP3	4.01628e-08	0.000354516		HNRNPL	0.830182	-0.0157592
chr19	41432408	41433537	Artery_Tibial	ATP5SL		chr19	41432784	41432817	AC	;HNRNPL	;AGGF1;TARDBP;UPF1	HNRNPL;YBX1	HNRNPL;HNRNPLL;IGF2BP2;IGF2BP3	8.29977e-17	8.30841e-13		HNRNPL	0.316484	0.0444155
chr19	41432408	41433537	Brain_Caudate_basal_ganglia	ATP5SL		chr19	41432784	41432817	AC	;HNRNPL	;AGGF1;TARDBP;UPF1	HNRNPL;YBX1	HNRNPL;HNRNPLL;IGF2BP2;IGF2BP3	3.90784e-07	0.00380144		HNRNPL	0.644101	-0.0375212
chr19	41432408	41433537	Brain_Cerebellum	ATP5SL		chr19	41432784	41432817	AC	;HNRNPL	;AGGF1;TARDBP;UPF1	HNRNPL;YBX1	HNRNPL;HNRNPLL;IGF2BP2;IGF2BP3	7.04267e-10	8.38425e-06		HNRNPL	0.543809	-0.0459426
chr19	41432408	41433537	Brain_Cortex	ATP5SL		chr19	41432784	41432817	AC	;HNRNPL	;AGGF1;TARDBP;UPF1	HNRNPL;YBX1	HNRNPL;HNRNPLL;IGF2BP2;IGF2BP3	5.05244e-08	0.00064491		HNRNPL	0.695172	0.0293
chr19	41432408	41433537	Brain_Frontal_Cortex_BA9	ATP5SL		chr19	41432784	41432817	AC	;HNRNPL	;AGGF1;TARDBP;UPF1	HNRNPL;YBX1	HNRNPL;HNRNPLL;IGF2BP2;IGF2BP3	2.68929e-09	6.05865e-05		HNRNPL	0.0468321	0.163547
chr19	41432408	41433537	Brain_Hippocampus	ATP5SL		chr19	41432784	41432817	AC	;HNRNPL	;AGGF1;TARDBP;UPF1	HNRNPL;YBX1	HNRNPL;HNRNPLL;IGF2BP2;IGF2BP3	1.84762e-07	0.00290358		HNRNPL	0.388307	0.0721235
chr19	41432408	41433537	Brain_Hypothalamus	ATP5SL		chr19	41432784	41432817	AC	;HNRNPL	;AGGF1;TARDBP;UPF1	HNRNPL;YBX1	HNRNPL;HNRNPLL;IGF2BP2;IGF2BP3	4.07646e-08	0.000712911		HNRNPL	0.953051	-0.00502837
chr19	41432408	41433537	Brain_Nucleus_accumbens_basal_ganglia	ATP5SL		chr19	41432784	41432817	AC	;HNRNPL	;AGGF1;TARDBP;UPF1	HNRNPL;YBX1	HNRNPL;HNRNPLL;IGF2BP2;IGF2BP3	4.04623e-08	0.000509433		HNRNPL	0.432959	0.0636943
chr19	41432408	41433537	Brain_Putamen_basal_ganglia	ATP5SL		chr19	41432784	41432817	AC	;HNRNPL	;AGGF1;TARDBP;UPF1	HNRNPL;YBX1	HNRNPL;HNRNPLL;IGF2BP2;IGF2BP3	1.03882e-06	0.0120277		HNRNPL	0.599752	0.0438588
chr19	41432408	41433537	Brain_Spinal_cord_cervical_c-1	ATP5SL		chr19	41432784	41432817	AC	;HNRNPL	;AGGF1;TARDBP;UPF1	HNRNPL;YBX1	HNRNPL;HNRNPLL;IGF2BP2;IGF2BP3	4.57007e-06	0.0395713		HNRNPL	0.385343	0.0886766
chr19	41432408	41433537	Breast_Mammary_Tissue	ATP5SL		chr19	41432784	41432817	AC	;HNRNPL	;AGGF1;TARDBP;UPF1	HNRNPL;YBX1	HNRNPL;HNRNPLL;IGF2BP2;IGF2BP3	1.77301e-14	2.21666e-10		HNRNPL	0.494449	-0.036025
chr19	41432408	41433537	Cells_Cultured_fibroblasts	ATP5SL		chr19	41432784	41432817	AC	;HNRNPL	;AGGF1;TARDBP;UPF1	HNRNPL;YBX1	HNRNPL;HNRNPLL;IGF2BP2;IGF2BP3	9.12609e-16	8.13708e-12		HNRNPL	0.00287013	0.143535
chr19	41432408	41433537	Esophagus_Gastroesophageal_Junction	ATP5SL		chr19	41432784	41432817	AC	;HNRNPL	;AGGF1;TARDBP;UPF1	HNRNPL;YBX1	HNRNPL;HNRNPLL;IGF2BP2;IGF2BP3	9.12919e-16	1.72939e-11		HNRNPL	0.150951	0.0862666
chr19	41432408	41433537	Esophagus_Mucosa	ATP5SL		chr19	41432784	41432817	AC	;HNRNPL	;AGGF1;TARDBP;UPF1	HNRNPL;YBX1	HNRNPL;HNRNPLL;IGF2BP2;IGF2BP3	8.31612e-16	1.0054e-11		HNRNPL	0.313465	0.0490082
chr19	41432408	41433537	Esophagus_Muscularis	ATP5SL		chr19	41432784	41432817	AC	;HNRNPL	;AGGF1;TARDBP;UPF1	HNRNPL;YBX1	HNRNPL;HNRNPLL;IGF2BP2;IGF2BP3	2.94635e-14	1.87866e-10		HNRNPL	0.532133	0.0312807
chr19	41432408	41433537	Heart_Left_Ventricle	ATP5SL		chr19	41432784	41432817	AC	;HNRNPL	;AGGF1;TARDBP;UPF1	HNRNPL;YBX1	HNRNPL;HNRNPLL;IGF2BP2;IGF2BP3	1.38298e-10	1.69025e-06		HNRNPL	1.19516e-07	0.323064
chr19	41432408	41433537	Lung	ATP5SL		chr19	41432784	41432817	AC	;HNRNPL	;AGGF1;TARDBP;UPF1	HNRNPL;YBX1	HNRNPL;HNRNPLL;IGF2BP2;IGF2BP3	4.74894e-17	6.96265e-13		HNRNPL	0.875313	0.00725087
chr19	41432408	41433537	Muscle_Skeletal	ATP5SL		chr19	41432784	41432817	AC	;HNRNPL	;AGGF1;TARDBP;UPF1	HNRNPL;YBX1	HNRNPL;HNRNPLL;IGF2BP2;IGF2BP3	6.48485e-26	3.96514e-21		HNRNPL	0.279874	-0.044431
chr19	41432408	41433537	Nerve_Tibial	ATP5SL		chr19	41432784	41432817	AC	;HNRNPL	;AGGF1;TARDBP;UPF1	HNRNPL;YBX1	HNRNPL;HNRNPLL;IGF2BP2;IGF2BP3	1.62559e-17	2.48954e-13		HNRNPL	0.0318401	0.0995676
chr19	41432408	41433537	Pituitary	ATP5SL		chr19	41432784	41432817	AC	;HNRNPL	;AGGF1;TARDBP;UPF1	HNRNPL;YBX1	HNRNPL;HNRNPLL;IGF2BP2;IGF2BP3	1.82665e-15	5.5942e-11		HNRNPL	0.369429	-0.063852
chr19	41432408	41433537	Prostate	ATP5SL		chr19	41432784	41432817	AC	;HNRNPL	;AGGF1;TARDBP;UPF1	HNRNPL;YBX1	HNRNPL;HNRNPLL;IGF2BP2;IGF2BP3	1.34812e-06	0.00706941		HNRNPL	0.985915	0.00131477
chr19	41432408	41433537	Skin_Not_Sun_Exposed_Suprapubic	ATP5SL		chr19	41432784	41432817	AC	;HNRNPL	;AGGF1;TARDBP;UPF1	HNRNPL;YBX1	HNRNPL;HNRNPLL;IGF2BP2;IGF2BP3	3.07587e-17	2.69739e-13		HNRNPL	0.320356	-0.0465282
chr19	41432408	41433537	Skin_Sun_Exposed_Lower_leg	ATP5SL		chr19	41432784	41432817	AC	;HNRNPL	;AGGF1;TARDBP;UPF1	HNRNPL;YBX1	HNRNPL;HNRNPLL;IGF2BP2;IGF2BP3	2.20589e-17	1.60711e-13		HNRNPL	0.0215057	-0.0981125
chr19	41432408	41433537	Spleen	ATP5SL		chr19	41432784	41432817	AC	;HNRNPL	;AGGF1;TARDBP;UPF1	HNRNPL;YBX1	HNRNPL;HNRNPLL;IGF2BP2;IGF2BP3	1.43105e-10	1.49891e-06		HNRNPL	0.667614	0.0311507
chr19	41432408	41433537	Testis	ATP5SL		chr19	41432784	41432817	AC	;HNRNPL	;AGGF1;TARDBP;UPF1	HNRNPL;YBX1	HNRNPL;HNRNPLL;IGF2BP2;IGF2BP3	3.31823e-12	1.18884e-08		HNRNPL	0.937333	-0.0048594
chr19	41432408	41433537	Thyroid	ATP5SL		chr19	41432784	41432817	AC	;HNRNPL	;AGGF1;TARDBP;UPF1	HNRNPL;YBX1	HNRNPL;HNRNPLL;IGF2BP2;IGF2BP3	1.29697e-19	2.58162e-15		HNRNPL	0.0624515	0.0835407
chr19	41432408	41433537	Whole_Blood	ATP5SL		chr19	41432784	41432817	AC	;HNRNPL	;AGGF1;TARDBP;UPF1	HNRNPL;YBX1	HNRNPL;HNRNPLL;IGF2BP2;IGF2BP3	1.38728e-20	2.37034e-16		HNRNPL	0.417562	-0.0338338
chr15	68197628	68205121	Testis	CALML4		chr15	68207980	68207999	GT	;TARDBP;SRSF7;SND1;CSTF2T;DROSHA;DDX6;BUD13;AKAP1;BUD13;EIF4G2;DKC1	;AARS;ATXN2;CSTF2;CSTF2T;DDX55;DDX6;DROSHA;EIF4G2;NKRF;PTBP1;RBM15;RBM15B;SF3B1;SUB1;TARDBP;UPF1;YTHDC1;YTHDC2;YTHDF1	TARDBP;NOVA1;CELF2;CELF1	CELF1;CELF2;CELF4;CELF5;KHSRP;NOVA1;RBM24;TARDBP	2.38448e-08	4.49455e-05		TARDBP	0.000218164	0.165724
chr1	6825210	6871757	Colon_Sigmoid	CAMTA1		chr1	6872234	6872263	ACC	;HNRNPL;HNRNPL	;U2AF2	YBX1;SRSF9;NOVA2	HNRNPL;NOVA1;NOVA2;SRSF3;SRSF9;YBX1;ZNF346	1.13137e-05	0.0244695		HNRNPL	0.972599	0.00208109
chr1	6825210	6871757	Pancreas	CAMTA1		chr1	6872234	6872263	ACC	;HNRNPL;HNRNPL	;U2AF2	YBX1;SRSF9;NOVA2	HNRNPL;NOVA1;NOVA2;SRSF3;SRSF9;YBX1;ZNF346	1.27349e-07	0.000479354		HNRNPL	0.244978	-0.0724485
chr1	6825210	6871757	Stomach	CAMTA1		chr1	6872234	6872263	ACC	;HNRNPL;HNRNPL	;U2AF2	YBX1;SRSF9;NOVA2	HNRNPL;NOVA1;NOVA2;SRSF3;SRSF9;YBX1;ZNF346	8.82621e-07	0.00461068		HNRNPL	0.127335	-0.0921403
chr1	6825210	6871757	Adipose_Subcutaneous	CAMTA1		chr1	6872234	6872263	ACC	;HNRNPL;HNRNPL	;U2AF2	YBX1;SRSF9;NOVA2	HNRNPL;NOVA1;NOVA2;SRSF3;SRSF9;YBX1;ZNF346	1.86037e-10	7.53116e-07		HNRNPL	0.5086	-0.0291547
chr1	6825210	6871757	Adipose_Visceral_Omentum	CAMTA1		chr1	6872234	6872263	ACC	;HNRNPL;HNRNPL	;U2AF2	YBX1;SRSF9;NOVA2	HNRNPL;NOVA1;NOVA2;SRSF3;SRSF9;YBX1;ZNF346	8.22957e-09	4.35949e-05		HNRNPL	0.422237	-0.0369011
chr1	6825210	6871757	Artery_Aorta	CAMTA1		chr1	6872234	6872263	ACC	;HNRNPL;HNRNPL	;U2AF2	YBX1;SRSF9;NOVA2	HNRNPL;NOVA1;NOVA2;SRSF3;SRSF9;YBX1;ZNF346	1.54635e-13	1.90939e-09		HNRNPL	0.6305	0.0255591
chr1	6825210	6871757	Artery_Tibial	CAMTA1		chr1	6872234	6872263	ACC	;HNRNPL;HNRNPL	;U2AF2	YBX1;SRSF9;NOVA2	HNRNPL;NOVA1;NOVA2;SRSF3;SRSF9;YBX1;ZNF346	1.4773e-21	4.36388e-17		HNRNPL	0.39154	-0.0365841
chr1	6825210	6871757	Breast_Mammary_Tissue	CAMTA1		chr1	6872234	6872263	ACC	;HNRNPL;HNRNPL	;U2AF2	YBX1;SRSF9;NOVA2	HNRNPL;NOVA1;NOVA2;SRSF3;SRSF9;YBX1;ZNF346	1.76252e-12	1.73869e-08		HNRNPL	0.52025	-0.0351161
chr1	6825210	6871757	Cells_Cultured_fibroblasts	CAMTA1		chr1	6872234	6872263	ACC	;HNRNPL;HNRNPL	;U2AF2	YBX1;SRSF9;NOVA2	HNRNPL;NOVA1;NOVA2;SRSF3;SRSF9;YBX1;ZNF346	5.21778e-21	1.21216e-16		HNRNPL	0.150603	-0.0685628
chr1	6825210	6871757	Esophagus_Gastroesophageal_Junction	CAMTA1		chr1	6872234	6872263	ACC	;HNRNPL;HNRNPL	;U2AF2	YBX1;SRSF9;NOVA2	HNRNPL;NOVA1;NOVA2;SRSF3;SRSF9;YBX1;ZNF346	1.30066e-06	0.00341981		HNRNPL	0.567171	0.0337065
chr1	6825210	6871757	Esophagus_Mucosa	CAMTA1		chr1	6872234	6872263	ACC	;HNRNPL;HNRNPL	;U2AF2	YBX1;SRSF9;NOVA2	HNRNPL;NOVA1;NOVA2;SRSF3;SRSF9;YBX1;ZNF346	1.20365e-18	2.50042e-14		HNRNPL	1.59235e-06	-0.239131
chr1	6825210	6871757	Lung	CAMTA1		chr1	6872234	6872263	ACC	;HNRNPL;HNRNPL	;U2AF2	YBX1;SRSF9;NOVA2	HNRNPL;NOVA1;NOVA2;SRSF3;SRSF9;YBX1;ZNF346	1.06256e-06	0.00237402		HNRNPL	0.0162406	-0.114284
chr1	6825210	6871757	Minor_Salivary_Gland	CAMTA1		chr1	6872234	6872263	ACC	;HNRNPL;HNRNPL	;U2AF2	YBX1;SRSF9;NOVA2	HNRNPL;NOVA1;NOVA2;SRSF3;SRSF9;YBX1;ZNF346	4.31352e-07	0.00608559		HNRNPL	0.66085	0.0404367
chr1	6825210	6871757	Nerve_Tibial	CAMTA1		chr1	6872234	6872263	ACC	;HNRNPL;HNRNPL	;U2AF2	YBX1;SRSF9;NOVA2	HNRNPL;NOVA1;NOVA2;SRSF3;SRSF9;YBX1;ZNF346	1.26158e-06	0.00294654		HNRNPL	0.347168	-0.0425557
chr1	6825210	6871757	Prostate	CAMTA1		chr1	6872234	6872263	ACC	;HNRNPL;HNRNPL	;U2AF2	YBX1;SRSF9;NOVA2	HNRNPL;NOVA1;NOVA2;SRSF3;SRSF9;YBX1;ZNF346	8.79005e-07	0.00591463		HNRNPL	0.678939	0.0301185
chr1	6825210	6871757	Skin_Not_Sun_Exposed_Suprapubic	CAMTA1		chr1	6872234	6872263	ACC	;HNRNPL;HNRNPL	;U2AF2	YBX1;SRSF9;NOVA2	HNRNPL;NOVA1;NOVA2;SRSF3;SRSF9;YBX1;ZNF346	1.98735e-10	1.04274e-06		HNRNPL	0.276402	-0.0519296
chr1	6825210	6871757	Skin_Sun_Exposed_Lower_leg	CAMTA1		chr1	6872234	6872263	ACC	;HNRNPL;HNRNPL	;U2AF2	YBX1;SRSF9;NOVA2	HNRNPL;NOVA1;NOVA2;SRSF3;SRSF9;YBX1;ZNF346	1.55074e-14	8.65769e-11		HNRNPL	0.101314	0.0700482
chr1	6825210	6871757	Spleen	CAMTA1		chr1	6872234	6872263	ACC	;HNRNPL;HNRNPL	;U2AF2	YBX1;SRSF9;NOVA2	HNRNPL;NOVA1;NOVA2;SRSF3;SRSF9;YBX1;ZNF346	9.64437e-06	0.0352735		HNRNPL	0.472315	0.0506132
chr1	6825210	6871757	Thyroid	CAMTA1		chr1	6872234	6872263	ACC	;HNRNPL;HNRNPL	;U2AF2	YBX1;SRSF9;NOVA2	HNRNPL;NOVA1;NOVA2;SRSF3;SRSF9;YBX1;ZNF346	2.2822e-11	7.66377e-08		HNRNPL	0.195337	0.0575203
chr1	6871840	6887654	Cells_EBV-transformed_lymphocytes	CAMTA1		chr1	6872234	6872263	ACC	;HNRNPL;HNRNPL	;U2AF2	YBX1;SRSF9;NOVA2	HNRNPL;NOVA1;NOVA2;SRSF3;SRSF9;YBX1;ZNF346	3.37714e-06	0.0252174		HNRNPL	0.00173572	0.279468
chr1	6871840	6887654	Muscle_Skeletal	CAMTA1		chr1	6872234	6872263	ACC	;HNRNPL;HNRNPL	;U2AF2	YBX1;SRSF9;NOVA2	HNRNPL;NOVA1;NOVA2;SRSF3;SRSF9;YBX1;ZNF346	6.81357e-08	0.000125604		HNRNPL	0.890594	0.00528652
chr18	13117643	13124487	Adipose_Visceral_Omentum	CEP192		chr18	13122833	13122860	GT	;TARDBP	;TARDBP;U2AF2	TARDBP;NOVA1;CELF2;CELF1	CELF1;CELF2;CELF4;CELF5;KHSRP;NOVA1;RBM24;TARDBP	5.03517e-08	0.000351213		TARDBP	0.920483	0.00437292
chr18	13117643	13124487	Lung	CEP192		chr18	13122833	13122860	GT	;TARDBP	;TARDBP;U2AF2	TARDBP;NOVA1;CELF2;CELF1	CELF1;CELF2;CELF4;CELF5;KHSRP;NOVA1;RBM24;TARDBP	9.492e-08	0.000532039		TARDBP	0.108398	0.0620253
chr18	13117643	13124487	Skin_Sun_Exposed_Lower_leg	CEP192		chr18	13122833	13122860	GT	;TARDBP	;TARDBP;U2AF2	TARDBP;NOVA1;CELF2;CELF1	CELF1;CELF2;CELF4;CELF5;KHSRP;NOVA1;RBM24;TARDBP	2.52348e-10	2.1297e-06		TARDBP	0.0063227	0.103612
chr1	16970767	16972360	Skin_Not_Sun_Exposed_Suprapubic	CROCC		chr1	16971211	16971252	GT	;DKC1;EIF4G2;AQR	;DKC1;EIF4G2;TARDBP	TARDBP;NOVA1;CELF2;CELF1	CELF1;CELF2;CELF4;CELF5;KHSRP;NOVA1;RBM24;TARDBP	3.76175e-07	0.00216991		TARDBP	0.274364	0.0492914
chr7	99672679	99674533	Skin_Sun_Exposed_Lower_leg	CYP3A5		chr7	99671118	99671163	AC	;HNRNPL;HNRNPL	;CELF2;TARDBP	HNRNPL;YBX1	HNRNPL;HNRNPLL;IGF2BP2;IGF2BP3	3.99628e-28	2.89159e-22		HNRNPL	0.0095192	0.100064
chr7	157367483	157382246	Prostate	DNAJB6		chr7	157381746	157381775	GT	;SRSF7;EIF4G2;TARDBP	;EIF4G2;PTBP1;RPS5;TARDBP;U2AF2	TARDBP;NOVA1;CELF2;CELF1	CELF1;CELF2;CELF4;CELF5;KHSRP;NOVA1;RBM24;TARDBP	1.56218e-10	1.50531e-06		TARDBP	0.0108594	-0.174488
chr7	157381986	157382246	Adipose_Subcutaneous	DNAJB6		chr7	157381746	157381775	GT	;SRSF7;EIF4G2;TARDBP	;EIF4G2;PTBP1;RPS5;TARDBP;U2AF2	TARDBP;NOVA1;CELF2;CELF1	CELF1;CELF2;CELF4;CELF5;KHSRP;NOVA1;RBM24;TARDBP	3.02353e-13	5.67798e-10		TARDBP	0.242158	0.0466389
chr7	157381986	157382246	Adrenal_Gland	DNAJB6		chr7	157381746	157381775	GT	;SRSF7;EIF4G2;TARDBP	;EIF4G2;PTBP1;RPS5;TARDBP;U2AF2	TARDBP;NOVA1;CELF2;CELF1	CELF1;CELF2;CELF4;CELF5;KHSRP;NOVA1;RBM24;TARDBP	4.22527e-06	0.00693716		TARDBP	3.22091e-10	0.270346
chr7	157381986	157382246	Esophagus_Mucosa	DNAJB6		chr7	157381746	157381775	GT	;SRSF7;EIF4G2;TARDBP	;EIF4G2;PTBP1;RPS5;TARDBP;U2AF2	TARDBP;NOVA1;CELF2;CELF1	CELF1;CELF2;CELF4;CELF5;KHSRP;NOVA1;RBM24;TARDBP	1.70774e-11	8.15939e-08		TARDBP	0.0235471	0.0904618
chr7	157381986	157382246	Esophagus_Muscularis	DNAJB6		chr7	157381746	157381775	GT	;SRSF7;EIF4G2;TARDBP	;EIF4G2;PTBP1;RPS5;TARDBP;U2AF2	TARDBP;NOVA1;CELF2;CELF1	CELF1;CELF2;CELF4;CELF5;KHSRP;NOVA1;RBM24;TARDBP	3.30126e-15	2.09803e-11		TARDBP	8.24201e-05	0.149771
chr7	157381986	157382246	Lung	DNAJB6		chr7	157381746	157381775	GT	;SRSF7;EIF4G2;TARDBP	;EIF4G2;PTBP1;RPS5;TARDBP;U2AF2	TARDBP;NOVA1;CELF2;CELF1	CELF1;CELF2;CELF4;CELF5;KHSRP;NOVA1;RBM24;TARDBP	6.02484e-11	8.54774e-08		TARDBP	1.40498e-08	0.21474
chr7	157381986	157382246	Pituitary	DNAJB6		chr7	157381746	157381775	GT	;SRSF7;EIF4G2;TARDBP	;EIF4G2;PTBP1;RPS5;TARDBP;U2AF2	TARDBP;NOVA1;CELF2;CELF1	CELF1;CELF2;CELF4;CELF5;KHSRP;NOVA1;RBM24;TARDBP	4.84669e-16	3.28852e-11		TARDBP	0.0135436	0.161556
chr7	157381986	157382246	Skin_Not_Sun_Exposed_Suprapubic	DNAJB6		chr7	157381746	157381775	GT	;SRSF7;EIF4G2;TARDBP	;EIF4G2;PTBP1;RPS5;TARDBP;U2AF2	TARDBP;NOVA1;CELF2;CELF1	CELF1;CELF2;CELF4;CELF5;KHSRP;NOVA1;RBM24;TARDBP	4.57074e-11	1.73581e-07		TARDBP	1.87865e-06	0.155518
chr7	157381986	157382246	Testis	DNAJB6		chr7	157381746	157381775	GT	;SRSF7;EIF4G2;TARDBP	;EIF4G2;PTBP1;RPS5;TARDBP;U2AF2	TARDBP;NOVA1;CELF2;CELF1	CELF1;CELF2;CELF4;CELF5;KHSRP;NOVA1;RBM24;TARDBP	2.46016e-16	2.70873e-12		TARDBP	0.00464662	-0.146349
chr7	157381986	157382246	Whole_Blood	DNAJB6		chr7	157381746	157381775	GT	;SRSF7;EIF4G2;TARDBP	;EIF4G2;PTBP1;RPS5;TARDBP;U2AF2	TARDBP;NOVA1;CELF2;CELF1	CELF1;CELF2;CELF4;CELF5;KHSRP;NOVA1;RBM24;TARDBP	2.19554e-05	0.013946		TARDBP	0.72248	0.0126551
chr21	39347483	39348292	Esophagus_Gastroesophageal_Junction	HMGN1		chr21	39347058	39347079	GT	;TARDBP;KHSRP	;ATXN2;CPSF3;CSTF2;CSTF2T;ELAVL1;EWSR1;HNRNPC;SRSF1;TARDBP;TIAL1;U2AF2;WDR33;ZC3H7B	TARDBP;NOVA1;CELF2;CELF1	CELF1;CELF2;CELF4;CELF5;KHSRP;NOVA1;RBM24;TARDBP	1.0519e-13	3.14939e-09		KHSRP	2.66476e-08	0.314598
chr21	39347483	39348292	Esophagus_Gastroesophageal_Junction	HMGN1		chr21	39347058	39347079	GT	;TARDBP;KHSRP	;ATXN2;CPSF3;CSTF2;CSTF2T;ELAVL1;EWSR1;HNRNPC;SRSF1;TARDBP;TIAL1;U2AF2;WDR33;ZC3H7B	TARDBP;NOVA1;CELF2;CELF1	CELF1;CELF2;CELF4;CELF5;KHSRP;NOVA1;RBM24;TARDBP	1.0519e-13	3.14939e-09		TARDBP	0.372252	-0.0516322
chr16	4476487	4483637	Skin_Not_Sun_Exposed_Suprapubic	HMOX2		chr16	4483161	4483224	GT	;EIF4G2;EIF4G2;DKC1	;ATXN2;DKC1;EIF4G2;TARDBP	TARDBP;NOVA1;CELF2;CELF1	CELF1;CELF2;CELF4;CELF5;KHSRP;NOVA1;RBM24;TARDBP	3.47763e-08	5.68375e-05		TARDBP	0.971604	-0.00163073
chr2	86153574	86159536	Adipose_Subcutaneous	IMMT		chr2	86153305	86153342	GT	;TARDBP;EIF4G2;DKC1	;ATXN2;CSTF2T;DKC1;EIF4G2;HNRNPC;TARDBP	TARDBP;NOVA1;CELF2;CELF1	CELF1;CELF2;CELF4;CELF5;KHSRP;NOVA1;RBM24;TARDBP	3.77991e-05	0.0269797		TARDBP	0.987632	-0.00061741
chr4	146175811	146176168	Cells_EBV-transformed_lymphocytes	LSM6		chr4	146177028	146177049	GT	;TARDBP	;CELF2;PTBP1;TARDBP	TARDBP;NOVA1;CELF2;CELF1	CELF1;CELF2;CELF4;CELF5;KHSRP;NOVA1;RBM24;TARDBP	8.46113e-24	8.60743e-17		CELF2	0.388336	-0.0675091
chr4	146175811	146176168	Cells_EBV-transformed_lymphocytes	LSM6		chr4	146177028	146177049	GT	;TARDBP	;CELF2;PTBP1;TARDBP	TARDBP;NOVA1;CELF2;CELF1	CELF1;CELF2;CELF4;CELF5;KHSRP;NOVA1;RBM24;TARDBP	8.46113e-24	8.60743e-17		TARDBP	0.129648	-0.118283
chr4	146175811	146182912	Adrenal_Gland	LSM6		chr4	146177028	146177049	GT	;TARDBP	;CELF2;PTBP1;TARDBP	TARDBP;NOVA1;CELF2;CELF1	CELF1;CELF2;CELF4;CELF5;KHSRP;NOVA1;RBM24;TARDBP	4.40644e-06	0.00289551		CELF2	0.737045	-0.0242393
chr4	146175811	146182912	Adrenal_Gland	LSM6		chr4	146177028	146177049	GT	;TARDBP	;CELF2;PTBP1;TARDBP	TARDBP;NOVA1;CELF2;CELF1	CELF1;CELF2;CELF4;CELF5;KHSRP;NOVA1;RBM24;TARDBP	4.40644e-06	0.00289551		TARDBP	0.00939639	-0.186158
chr4	146176437	146182912	Brain_Cerebellar_Hemisphere	LSM6		chr4	146177028	146177049	GT	;TARDBP	;CELF2;PTBP1;TARDBP	TARDBP;NOVA1;CELF2;CELF1	CELF1;CELF2;CELF4;CELF5;KHSRP;NOVA1;RBM24;TARDBP	2.61337e-12	1.01608e-07		CELF2	0.654595	-0.0334221
chr4	146176437	146182912	Brain_Cerebellum	LSM6		chr4	146177028	146177049	GT	;TARDBP	;CELF2;PTBP1;TARDBP	TARDBP;NOVA1;CELF2;CELF1	CELF1;CELF2;CELF4;CELF5;KHSRP;NOVA1;RBM24;TARDBP	1.36423e-22	1.18933e-15		CELF2	0.31001	0.0730253
chr4	146176437	146182912	Brain_Cerebellar_Hemisphere	LSM6		chr4	146177028	146177049	GT	;TARDBP	;CELF2;PTBP1;TARDBP	TARDBP;NOVA1;CELF2;CELF1	CELF1;CELF2;CELF4;CELF5;KHSRP;NOVA1;RBM24;TARDBP	2.61337e-12	1.01608e-07		TARDBP	0.000608044	0.25186
chr4	146176437	146182912	Brain_Cerebellum	LSM6		chr4	146177028	146177049	GT	;TARDBP	;CELF2;PTBP1;TARDBP	TARDBP;NOVA1;CELF2;CELF1	CELF1;CELF2;CELF4;CELF5;KHSRP;NOVA1;RBM24;TARDBP	1.36423e-22	1.18933e-15		TARDBP	0.00706429	0.192319
chr17	29115840	29118045	Nerve_Tibial	MYO18A		chr17	29116614	29116625	GT	;DROSHA;TARDBP;GEMIN5;TARDBP	;CELF2;DDX6;RBFOX2;RPS5;TARDBP	TARDBP;NOVA1;CELF2;CELF1	CELF1;CELF2;CELF4;CELF5;KHSRP;NOVA1;RBM24;TARDBP	3.02116e-21	1.22577e-16		CELF2	7.25455e-11	-0.2854
chr17	29115840	29118045	Nerve_Tibial	MYO18A		chr17	29116614	29116625	GT	;DROSHA;TARDBP;GEMIN5;TARDBP	;CELF2;DDX6;RBFOX2;RPS5;TARDBP	TARDBP;NOVA1;CELF2;CELF1	CELF1;CELF2;CELF4;CELF5;KHSRP;NOVA1;RBM24;TARDBP	3.02116e-21	1.22577e-16		TARDBP	0.264181	-0.0498649
chr17	29117905	29118045	Stomach	MYO18A		chr17	29116614	29116625	GT	;DROSHA;TARDBP;GEMIN5;TARDBP	;CELF2;DDX6;RBFOX2;RPS5;TARDBP	TARDBP;NOVA1;CELF2;CELF1	CELF1;CELF2;CELF4;CELF5;KHSRP;NOVA1;RBM24;TARDBP	5.98325e-09	8.54512e-05		CELF2	0.259492	-0.0578786
chr17	29117905	29118045	Stomach	MYO18A		chr17	29116614	29116625	GT	;DROSHA;TARDBP;GEMIN5;TARDBP	;CELF2;DDX6;RBFOX2;RPS5;TARDBP	TARDBP;NOVA1;CELF2;CELF1	CELF1;CELF2;CELF4;CELF5;KHSRP;NOVA1;RBM24;TARDBP	5.98325e-09	8.54512e-05		TARDBP	0.996269	0.000240271
chr10	122427031	122429624	Artery_Aorta	PLEKHA1		chr10	122429495	122429530	GT	;DROSHA;DKC1	;CELF2;CSTF2;CSTF2T;ELAVL1;PTBP1;RBFOX2;RPS5;TARDBP	TARDBP;NOVA1;CELF2;CELF1	CELF1;CELF2;CELF4;CELF5;KHSRP;NOVA1;RBM24;TARDBP	4.36912e-12	4.64873e-08		CELF2	0.000406443	0.181931
chr10	122427031	122429624	Cells_Cultured_fibroblasts	PLEKHA1		chr10	122429495	122429530	GT	;DROSHA;DKC1	;CELF2;CSTF2;CSTF2T;ELAVL1;PTBP1;RBFOX2;RPS5;TARDBP	TARDBP;NOVA1;CELF2;CELF1	CELF1;CELF2;CELF4;CELF5;KHSRP;NOVA1;RBM24;TARDBP	1.84964e-16	2.19874e-12		CELF2	9.87551e-06	-0.215884
chr10	122427031	122429624	Esophagus_Muscularis	PLEKHA1		chr10	122429495	122429530	GT	;DROSHA;DKC1	;CELF2;CSTF2;CSTF2T;ELAVL1;PTBP1;RBFOX2;RPS5;TARDBP	TARDBP;NOVA1;CELF2;CELF1	CELF1;CELF2;CELF4;CELF5;KHSRP;NOVA1;RBM24;TARDBP	1.77438e-11	1.22315e-07		CELF2	0.00100014	-0.150954
chr10	122427031	122429624	Artery_Aorta	PLEKHA1		chr10	122429495	122429530	GT	;DROSHA;DKC1	;CELF2;CSTF2;CSTF2T;ELAVL1;PTBP1;RBFOX2;RPS5;TARDBP	TARDBP;NOVA1;CELF2;CELF1	CELF1;CELF2;CELF4;CELF5;KHSRP;NOVA1;RBM24;TARDBP	4.36912e-12	4.64873e-08		TARDBP	0.000474354	-0.179853
chr10	122427031	122429624	Cells_Cultured_fibroblasts	PLEKHA1		chr10	122429495	122429530	GT	;DROSHA;DKC1	;CELF2;CSTF2;CSTF2T;ELAVL1;PTBP1;RBFOX2;RPS5;TARDBP	TARDBP;NOVA1;CELF2;CELF1	CELF1;CELF2;CELF4;CELF5;KHSRP;NOVA1;RBM24;TARDBP	1.84964e-16	2.19874e-12		TARDBP	4.97068e-12	0.332485
chr10	122427031	122429624	Esophagus_Muscularis	PLEKHA1		chr10	122429495	122429530	GT	;DROSHA;DKC1	;CELF2;CSTF2;CSTF2T;ELAVL1;PTBP1;RBFOX2;RPS5;TARDBP	TARDBP;NOVA1;CELF2;CELF1	CELF1;CELF2;CELF4;CELF5;KHSRP;NOVA1;RBM24;TARDBP	1.77438e-11	1.22315e-07		TARDBP	0.0518301	-0.0895473
chr10	122428316	122429624	Adipose_Subcutaneous	PLEKHA1		chr10	122429495	122429530	GT	;DROSHA;DKC1	;CELF2;CSTF2;CSTF2T;ELAVL1;PTBP1;RBFOX2;RPS5;TARDBP	TARDBP;NOVA1;CELF2;CELF1	CELF1;CELF2;CELF4;CELF5;KHSRP;NOVA1;RBM24;TARDBP	2.42851e-09	7.42322e-06		CELF2	0.429688	-0.0348672
chr10	122428316	122429624	Adipose_Visceral_Omentum	PLEKHA1		chr10	122429495	122429530	GT	;DROSHA;DKC1	;CELF2;CSTF2;CSTF2T;ELAVL1;PTBP1;RBFOX2;RPS5;TARDBP	TARDBP;NOVA1;CELF2;CELF1	CELF1;CELF2;CELF4;CELF5;KHSRP;NOVA1;RBM24;TARDBP	6.05899e-12	1.05863e-07		CELF2	1.99723e-07	-0.246216
chr10	122428316	122429624	Breast_Mammary_Tissue	PLEKHA1		chr10	122429495	122429530	GT	;DROSHA;DKC1	;CELF2;CSTF2;CSTF2T;ELAVL1;PTBP1;RBFOX2;RPS5;TARDBP	TARDBP;NOVA1;CELF2;CELF1	CELF1;CELF2;CELF4;CELF5;KHSRP;NOVA1;RBM24;TARDBP	7.00453e-07	0.0021877		CELF2	1.64276e-13	0.3855
chr10	122428316	122429624	Lung	PLEKHA1		chr10	122429495	122429530	GT	;DROSHA;DKC1	;CELF2;CSTF2;CSTF2T;ELAVL1;PTBP1;RBFOX2;RPS5;TARDBP	TARDBP;NOVA1;CELF2;CELF1	CELF1;CELF2;CELF4;CELF5;KHSRP;NOVA1;RBM24;TARDBP	7.76773e-14	1.42444e-09		CELF2	2.84679e-07	-0.239261
chr10	122428316	122429624	Nerve_Tibial	PLEKHA1		chr10	122429495	122429530	GT	;DROSHA;DKC1	;CELF2;CSTF2;CSTF2T;ELAVL1;PTBP1;RBFOX2;RPS5;TARDBP	TARDBP;NOVA1;CELF2;CELF1	CELF1;CELF2;CELF4;CELF5;KHSRP;NOVA1;RBM24;TARDBP	5.11465e-07	0.000787887		CELF2	0.0336272	-0.0969272
chr10	122428316	122429624	Thyroid	PLEKHA1		chr10	122429495	122429530	GT	;DROSHA;DKC1	;CELF2;CSTF2;CSTF2T;ELAVL1;PTBP1;RBFOX2;RPS5;TARDBP	TARDBP;NOVA1;CELF2;CELF1	CELF1;CELF2;CELF4;CELF5;KHSRP;NOVA1;RBM24;TARDBP	4.04443e-06	0.00446987		CELF2	0.027215	0.0968112
chr10	122428316	122429624	Vagina	PLEKHA1		chr10	122429495	122429530	GT	;DROSHA;DKC1	;CELF2;CSTF2;CSTF2T;ELAVL1;PTBP1;RBFOX2;RPS5;TARDBP	TARDBP;NOVA1;CELF2;CELF1	CELF1;CELF2;CELF4;CELF5;KHSRP;NOVA1;RBM24;TARDBP	4.42932e-06	0.0333731		CELF2	5.30488e-22	0.778833
chr10	122428316	122429624	Adipose_Subcutaneous	PLEKHA1		chr10	122429495	122429530	GT	;DROSHA;DKC1	;CELF2;CSTF2;CSTF2T;ELAVL1;PTBP1;RBFOX2;RPS5;TARDBP	TARDBP;NOVA1;CELF2;CELF1	CELF1;CELF2;CELF4;CELF5;KHSRP;NOVA1;RBM24;TARDBP	2.42851e-09	7.42322e-06		TARDBP	0.0663685	-0.0809621
chr10	122428316	122429624	Adipose_Visceral_Omentum	PLEKHA1		chr10	122429495	122429530	GT	;DROSHA;DKC1	;CELF2;CSTF2;CSTF2T;ELAVL1;PTBP1;RBFOX2;RPS5;TARDBP	TARDBP;NOVA1;CELF2;CELF1	CELF1;CELF2;CELF4;CELF5;KHSRP;NOVA1;RBM24;TARDBP	6.05899e-12	1.05863e-07		TARDBP	0.0657368	0.088245
chr10	122428316	122429624	Breast_Mammary_Tissue	PLEKHA1		chr10	122429495	122429530	GT	;DROSHA;DKC1	;CELF2;CSTF2;CSTF2T;ELAVL1;PTBP1;RBFOX2;RPS5;TARDBP	TARDBP;NOVA1;CELF2;CELF1	CELF1;CELF2;CELF4;CELF5;KHSRP;NOVA1;RBM24;TARDBP	7.00453e-07	0.0021877		TARDBP	5.04488e-05	-0.216976
chr10	122428316	122429624	Lung	PLEKHA1		chr10	122429495	122429530	GT	;DROSHA;DKC1	;CELF2;CSTF2;CSTF2T;ELAVL1;PTBP1;RBFOX2;RPS5;TARDBP	TARDBP;NOVA1;CELF2;CELF1	CELF1;CELF2;CELF4;CELF5;KHSRP;NOVA1;RBM24;TARDBP	7.76773e-14	1.42444e-09		TARDBP	0.504667	0.03149
chr10	122428316	122429624	Nerve_Tibial	PLEKHA1		chr10	122429495	122429530	GT	;DROSHA;DKC1	;CELF2;CSTF2;CSTF2T;ELAVL1;PTBP1;RBFOX2;RPS5;TARDBP	TARDBP;NOVA1;CELF2;CELF1	CELF1;CELF2;CELF4;CELF5;KHSRP;NOVA1;RBM24;TARDBP	5.11465e-07	0.000787887		TARDBP	0.0110677	-0.115802
chr10	122428316	122429624	Thyroid	PLEKHA1		chr10	122429495	122429530	GT	;DROSHA;DKC1	;CELF2;CSTF2;CSTF2T;ELAVL1;PTBP1;RBFOX2;RPS5;TARDBP	TARDBP;NOVA1;CELF2;CELF1	CELF1;CELF2;CELF4;CELF5;KHSRP;NOVA1;RBM24;TARDBP	4.04443e-06	0.00446987		TARDBP	0.00143278	-0.13943
chr10	122428316	122429624	Vagina	PLEKHA1		chr10	122429495	122429530	GT	;DROSHA;DKC1	;CELF2;CSTF2;CSTF2T;ELAVL1;PTBP1;RBFOX2;RPS5;TARDBP	TARDBP;NOVA1;CELF2;CELF1	CELF1;CELF2;CELF4;CELF5;KHSRP;NOVA1;RBM24;TARDBP	4.42932e-06	0.0333731		TARDBP	1.28612e-05	-0.399112
chr10	122428346	122429624	Brain_Spinal_cord_cervical_c-1	PLEKHA1		chr10	122429495	122429530	GT	;DROSHA;DKC1	;CELF2;CSTF2;CSTF2T;ELAVL1;PTBP1;RBFOX2;RPS5;TARDBP	TARDBP;NOVA1;CELF2;CELF1	CELF1;CELF2;CELF4;CELF5;KHSRP;NOVA1;RBM24;TARDBP	7.16256e-11	4.0092e-06		CELF2	0.132423	-0.132285
chr10	122428346	122429624	Brain_Spinal_cord_cervical_c-1	PLEKHA1		chr10	122429495	122429530	GT	;DROSHA;DKC1	;CELF2;CSTF2;CSTF2T;ELAVL1;PTBP1;RBFOX2;RPS5;TARDBP	TARDBP;NOVA1;CELF2;CELF1	CELF1;CELF2;CELF4;CELF5;KHSRP;NOVA1;RBM24;TARDBP	7.16256e-11	4.0092e-06		TARDBP	0.800034	0.0223696
chr7	5063755	5072362	Nerve_Tibial	RBAK		chr7	5063478	5063513	GT	;TARDBP	;CELF2;CSTF2T;ELAVL1;TARDBP	TARDBP;NOVA1;CELF2;CELF1	CELF1;CELF2;CELF4;CELF5;KHSRP;NOVA1;RBM24;TARDBP	5.04445e-05	0.0477521		CELF2	0.892786	-0.00586137
chr7	5063755	5072362	Nerve_Tibial	RBAK		chr7	5063478	5063513	GT	;TARDBP	;CELF2;CSTF2T;ELAVL1;TARDBP	TARDBP;NOVA1;CELF2;CELF1	CELF1;CELF2;CELF4;CELF5;KHSRP;NOVA1;RBM24;TARDBP	5.04445e-05	0.0477521		TARDBP	0.0103335	-0.11118
chr7	5063755	5072362	Nerve_Tibial	RBAKDN		chr7	5063478	5063513	GT	;TARDBP	;CELF2;CSTF2T;ELAVL1;TARDBP	TARDBP;NOVA1;CELF2;CELF1	CELF1;CELF2;CELF4;CELF5;KHSRP;NOVA1;RBM24;TARDBP	5.04445e-05	0.0185705		CELF2	0.892786	-0.00586137
chr7	5063755	5072362	Nerve_Tibial	RBAKDN		chr7	5063478	5063513	GT	;TARDBP	;CELF2;CSTF2T;ELAVL1;TARDBP	TARDBP;NOVA1;CELF2;CELF1	CELF1;CELF2;CELF4;CELF5;KHSRP;NOVA1;RBM24;TARDBP	5.04445e-05	0.0185705		TARDBP	0.0103335	-0.11118
chr15	58865302	58868493	Testis	RNF111		chr15	58868457	58868486	GTTTT	;HNRNPC	;ELAVL1	TIA-1;ELAVL1;CELF2	CELF1;CELF2;ELAVL1;SSB;TIA1;XPO5	2.14409e-36	1.30743e-30		ELAVL1	0.963483	-0.0023844
chr12	46387972	46470153	Muscle_Skeletal	RP11-446N19.1		chr12	46389435	46389464	AC	;HNRNPL	;DGCR8	HNRNPL;YBX1	HNRNPL;HNRNPLL;IGF2BP2;IGF2BP3	3.69434e-05	0.0321948		HNRNPL	0.42257	0.030426
chr12	46387972	46470153	Muscle_Skeletal	RP11-96H19.1		chr12	46389435	46389464	AC	;HNRNPL	;DGCR8	HNRNPL;YBX1	HNRNPL;HNRNPLL;IGF2BP2;IGF2BP3	3.69434e-05	0.0373725		HNRNPL	0.42257	0.030426
chr3	42569073	42579477	Nerve_Tibial	RP4-613B23.1		chr3	42578540	42578571	GT	;TARDBP	;TARDBP	TARDBP;NOVA1;CELF2;CELF1	CELF1;CELF2;CELF4;CELF5;KHSRP;NOVA1;RBM24;TARDBP	8.07232e-10	1.76592e-06		TARDBP	0.1354	0.0610316
chr3	42569073	42579477	Nerve_Tibial	SEC22C		chr3	42578540	42578571	GT	;TARDBP	;TARDBP	TARDBP;NOVA1;CELF2;CELF1	CELF1;CELF2;CELF4;CELF5;KHSRP;NOVA1;RBM24;TARDBP	8.07232e-10	2.97205e-06		TARDBP	0.1354	0.0610316
chr17	3592383	3608427	Artery_Aorta	SHPK		chr17	3609323	3609350	CT	;RBM15	;PTBP1;UPF1;YTHDC1	PTBP2;PTBP1;CELF2	PTBP1;PTBP2	1.49978e-10	5.44747e-07		PTBP1	0.0645474	-0.0978564
chr17	3592383	3608427	Brain_Cerebellar_Hemisphere	SHPK		chr17	3609323	3609350	CT	;RBM15	;PTBP1;UPF1;YTHDC1	PTBP2;PTBP1;CELF2	PTBP1;PTBP2	2.01781e-13	5.4456e-09		PTBP1	0.180171	-0.105636
chr17	3592383	3608427	Brain_Cerebellum	SHPK		chr17	3609323	3609350	CT	;RBM15	;PTBP1;UPF1;YTHDC1	PTBP2;PTBP1;CELF2	PTBP1;PTBP2	2.46167e-12	6.01659e-08		PTBP1	0.342329	-0.0711827
chr17	3592383	3608427	Muscle_Skeletal	SHPK		chr17	3609323	3609350	CT	;RBM15	;PTBP1;UPF1;YTHDC1	PTBP2;PTBP1;CELF2	PTBP1;PTBP2	3.1848e-05	0.0206738		PTBP1	0.0406894	-0.0797392
chr17	3592383	3608427	Prostate	SHPK		chr17	3609323	3609350	CT	;RBM15	;PTBP1;UPF1;YTHDC1	PTBP2;PTBP1;CELF2	PTBP1;PTBP2	2.23533e-06	0.00882405		PTBP1	0.888806	-0.0104863
chr17	3608565	3609309	Colon_Transverse	SHPK		chr17	3609323	3609350	CT	;RBM15	;PTBP1;UPF1;YTHDC1	PTBP2;PTBP1;CELF2	PTBP1;PTBP2	8.765e-10	4.69343e-06		PTBP1	0.00503508	-0.143181
chr17	3608565	3609309	Liver	SHPK		chr17	3609323	3609350	CT	;RBM15	;PTBP1;UPF1;YTHDC1	PTBP2;PTBP1;CELF2	PTBP1;PTBP2	7.50976e-06	0.0348886		PTBP1	0.223981	-0.0862397
chr17	3608565	3609309	Small_Intestine_Terminal_Ileum	SHPK		chr17	3609323	3609350	CT	;RBM15	;PTBP1;UPF1;YTHDC1	PTBP2;PTBP1;CELF2	PTBP1;PTBP2	5.56932e-07	0.00308494		PTBP1	0.0459193	-0.155131
chr17	3608565	3609309	Stomach	SHPK		chr17	3609323	3609350	CT	;RBM15	;PTBP1;UPF1;YTHDC1	PTBP2;PTBP1;CELF2	PTBP1;PTBP2	4.24e-10	3.76527e-06		PTBP1	0.0808541	-0.0995046
chr17	3608565	3609309	Adipose_Subcutaneous	SHPK		chr17	3609323	3609350	CT	;RBM15	;PTBP1;UPF1;YTHDC1	PTBP2;PTBP1;CELF2	PTBP1;PTBP2	4.69038e-22	2.52391e-18		PTBP1	0.85879	-0.00776647
chr17	3608565	3609309	Adipose_Visceral_Omentum	SHPK		chr17	3609323	3609350	CT	;RBM15	;PTBP1;UPF1;YTHDC1	PTBP2;PTBP1;CELF2	PTBP1;PTBP2	6.23212e-13	1.46505e-09		PTBP1	0.0945002	-0.0768576
chr17	3608565	3609309	Breast_Mammary_Tissue	SHPK		chr17	3609323	3609350	CT	;RBM15	;PTBP1;UPF1;YTHDC1	PTBP2;PTBP1;CELF2	PTBP1;PTBP2	1.40012e-10	4.70332e-07		PTBP1	0.608551	0.0254987
chr17	3608565	3609309	Esophagus_Gastroesophageal_Junction	SHPK		chr17	3609323	3609350	CT	;RBM15	;PTBP1;UPF1;YTHDC1	PTBP2;PTBP1;CELF2	PTBP1;PTBP2	3.10401e-06	0.00555499		PTBP1	0.43013	-0.045459
chr17	3608565	3609309	Lung	SHPK		chr17	3609323	3609350	CT	;RBM15	;PTBP1;UPF1;YTHDC1	PTBP2;PTBP1;CELF2	PTBP1;PTBP2	4.38856e-14	2.30763e-10		PTBP1	0.475814	-0.0323131
chr17	3608565	3609309	Ovary	SHPK		chr17	3609323	3609350	CT	;RBM15	;PTBP1;UPF1;YTHDC1	PTBP2;PTBP1;CELF2	PTBP1;PTBP2	2.81332e-09	3.33494e-05		PTBP1	0.681163	-0.0338422
chr17	3608565	3609309	Skin_Not_Sun_Exposed_Suprapubic	SHPK		chr17	3609323	3609350	CT	;RBM15	;PTBP1;UPF1;YTHDC1	PTBP2;PTBP1;CELF2	PTBP1;PTBP2	5.76538e-17	3.73158e-13		PTBP1	0.00125164	-0.145912
chr17	3608565	3609309	Skin_Sun_Exposed_Lower_leg	SHPK		chr17	3609323	3609350	CT	;RBM15	;PTBP1;UPF1;YTHDC1	PTBP2;PTBP1;CELF2	PTBP1;PTBP2	4.10205e-14	1.2182e-10		PTBP1	0.00012044	-0.154589
chr17	3608565	3609309	Thyroid	SHPK		chr17	3609323	3609350	CT	;RBM15	;PTBP1;UPF1;YTHDC1	PTBP2;PTBP1;CELF2	PTBP1;PTBP2	1.12575e-11	3.56702e-08		PTBP1	0.0983034	-0.0598827
chr17	3608565	3609309	Uterus	SHPK		chr17	3609323	3609350	CT	;RBM15	;PTBP1;UPF1;YTHDC1	PTBP2;PTBP1;CELF2	PTBP1;PTBP2	2.8636e-06	0.0204194		PTBP1	0.144579	-0.135959
chr17	3608565	3609309	Vagina	SHPK		chr17	3609323	3609350	CT	;RBM15	;PTBP1;UPF1;YTHDC1	PTBP2;PTBP1;CELF2	PTBP1;PTBP2	2.12491e-09	5.45938e-05		PTBP1	0.471027	-0.0630973
chr15	25059718	25061950	Muscle_Skeletal	SNHG14		chr15	25058898	25058925	AC	;HNRNPL	;RBFOX2	HNRNPL;YBX1	HNRNPL;HNRNPLL;IGF2BP2;IGF2BP3	6.95702e-22	2.96586e-17		HNRNPL	0.0839427	-0.0681441
chr7	143876622	143881923	Cells_Cultured_fibroblasts	TCAF1		chr7	143882194	143882219	GT	;EIF4G2;DKC1;TARDBP	;DKC1;EIF4G2;NKRF;TARDBP	TARDBP;NOVA1;CELF2;CELF1	CELF1;CELF2;CELF4;CELF5;KHSRP;NOVA1;RBM24;TARDBP	7.57228e-09	1.7939e-05		TARDBP	4.44149e-07	0.153673
chr17	3592383	3608427	Artery_Aorta	TRPV1		chr17	3609323	3609350	CT	;RBM15	;PTBP1;UPF1;YTHDC1	PTBP2;PTBP1;CELF2	PTBP1;PTBP2	1.49978e-10	7.06107e-07		PTBP1	0.0645474	-0.0978564
chr17	3592383	3608427	Artery_Tibial	TRPV1		chr17	3609323	3609350	CT	;RBM15	;PTBP1;UPF1;YTHDC1	PTBP2;PTBP1;CELF2	PTBP1;PTBP2	1.02562e-07	0.000107016		PTBP1	0.0103368	0.115761
chr17	3592383	3608427	Muscle_Skeletal	TRPV1		chr17	3609323	3609350	CT	;RBM15	;PTBP1;UPF1;YTHDC1	PTBP2;PTBP1;CELF2	PTBP1;PTBP2	3.1848e-05	0.0250925		PTBP1	0.0406894	-0.0797392
chr17	3608565	3609309	Colon_Transverse	TRPV1		chr17	3609323	3609350	CT	;RBM15	;PTBP1;UPF1;YTHDC1	PTBP2;PTBP1;CELF2	PTBP1;PTBP2	8.765e-10	6.41021e-06		PTBP1	0.00503508	-0.143181
chr17	3608565	3609309	Adipose_Subcutaneous	TRPV1		chr17	3609323	3609350	CT	;RBM15	;PTBP1;UPF1;YTHDC1	PTBP2;PTBP1;CELF2	PTBP1;PTBP2	4.69038e-22	5.19621e-18		PTBP1	0.85879	-0.00776647
chr17	3608565	3609309	Adipose_Visceral_Omentum	TRPV1		chr17	3609323	3609350	CT	;RBM15	;PTBP1;UPF1;YTHDC1	PTBP2;PTBP1;CELF2	PTBP1;PTBP2	6.23212e-13	3.4485e-09		PTBP1	0.0945002	-0.0768576
chr17	3608565	3609309	Breast_Mammary_Tissue	TRPV1		chr17	3609323	3609350	CT	;RBM15	;PTBP1;UPF1;YTHDC1	PTBP2;PTBP1;CELF2	PTBP1;PTBP2	1.40012e-10	6.76398e-07		PTBP1	0.608551	0.0254987
chr17	3608565	3609309	Esophagus_Gastroesophageal_Junction	TRPV1		chr17	3609323	3609350	CT	;RBM15	;PTBP1;UPF1;YTHDC1	PTBP2;PTBP1;CELF2	PTBP1;PTBP2	3.10401e-06	0.00405649		PTBP1	0.43013	-0.045459
chr17	3608565	3609309	Thyroid	TRPV1		chr17	3609323	3609350	CT	;RBM15	;PTBP1;UPF1;YTHDC1	PTBP2;PTBP1;CELF2	PTBP1;PTBP2	1.12575e-11	2.21275e-08		PTBP1	0.0983034	-0.0598827
chr16	84775225	84778895	Thyroid	USP10		chr16	84778092	84778117	GT	;EIF4G2;ZRANB2;TARDBP	;ATXN2;CSTF2T;EIF4G2;HNRNPC;SF3B1;TARDBP	TARDBP;NOVA1;CELF2;CELF1	CELF1;CELF2;CELF4;CELF5;KHSRP;NOVA1;RBM24;TARDBP	7.00489e-06	0.00955172		TARDBP	0.367148	-0.0399143
chr11	58616815	58617196	Testis	ZFP91		chr11	58617071	58617098	GT	;TARDBP	;CELF2;TARDBP	TARDBP;NOVA1;CELF2;CELF1	CELF1;CELF2;CELF4;CELF5;KHSRP;NOVA1;RBM24;TARDBP	5.98982e-11	3.2483e-07		CELF2	0.95631	0.00313924
chr11	58616815	58617196	Testis	ZFP91		chr11	58617071	58617098	GT	;TARDBP	;CELF2;TARDBP	TARDBP;NOVA1;CELF2;CELF1	CELF1;CELF2;CELF4;CELF5;KHSRP;NOVA1;RBM24;TARDBP	5.98982e-11	3.2483e-07		TARDBP	5.69251e-05	-0.227757
