# Supplementary material for: Genome-wide identification of tandem repeats associated with splicing variation across 49 tissues in humans
Source: HighWire-hosted journal article supplement (doi:10.1101/gr.277335.122), 2023-03-01
Supplement: Supplemental_Table_S7.xlsx [file Supplemental_Table_S7.xlsx]

## Sheet: Table S7
Table S7 TRs responsible for rare diseases
Chr	Start	End	Motif	Gene	Disease
chr1	149390802	149390842	GGC	NOTCH2NLC	Neuronal intranuclear inclusion diseas
chr1	57367043	57367125	AAAAT	DAB1	Spinocerebellar ataxia 37
chr10	79826383	79826404	GGC	NUTM2B-AS1	Oculopharyngodistal myopathy
chr12	6936716	6936773	CAG	ATN1	Dentatorubro-pallidoluysian atrophy
chr12	111598950	111599019	GCT	ATXN2	Spinocerebellar ataxia 2
chr12	50505001	50505053	GGC	DIP2B	Mental retardation, FRA12A type
chr13	70139383	70139428	CTG	ATXN8OS	Spinocerebellar ataxia 8
chr13	99985448	99985493	GCG	ZIC2	Holoprosencephaly 5
chr14	23321472	23321502	GCG	PABPN1	Oculopharyngeal muscular dystrophy
chr14	92071010	92071040	CTG	ATXN3	Spinocerebellar ataxia 3
chr15	22786671	22786703	GCG	NIPA1	Spastic paraplegia 6, autosomal dominant
chr16	24613438	24613532	AAAAT	TNRC6A	Familial adult myoclonic epilepsy 6
chr16	66490396	66490466	AATAA	BEAN1	Spinocerebellar ataxia 31
chr16	87604287	87604329	GCT	JPH3	Huntington disease-like 2
chr16	17470907	17470930	GGC	XYLT1	Baratela-Scott syndrome
chr17	80146992	80147139	GCCGCTGCCGACCTCGCTGT	EIF4A3	Robin sequence with cleft mandible and limb anomalies
chr18	55586153	55586229	AGC	TCF4	Fuchs endothelial corneal dystrophy 3
chr19	13207858	13207897	CAG	CACNA1A	Spinocerebellar ataxia 6
chr19	14496041	14496075	CCG	GIPC1	Oculopharyngodistal myopathy 2
chr19	45770204	45770264	CAG	DMPK	Myotonic dystrophy 1
chr19	18786027	18786050	CGT	COMP	Pseudoachondroplasia
chr2	96197066	96197124	AAAAT	STARD7	Familial adult myoclonic epilepsy 2
chr2	176093058	176093103	GGC	HOXD13	Syndactyly, type V
chr2	190880872	190880920	GCA	GLS	Developmental and epileptic encephalopathy 71
chr2	100104798	100104824	GCC	AFF3	KINSSHIP syndrome
chr20	2652733	2652757	GGGCCT	NOP56	Spinocerebellar ataxia 36
chr21	43776443	43776479	CCCCGCCCCGCG	CSTB	Unverricht-Lundborg disease
chr22	45795354	45795424	ATTCT	ATXN10	Spinocerebellar ataxia 10
chr3	63912685	63912715	GCA	ATXN7	Spinocerebellar ataxia 7
chr3	129172576	129172656	CAGG	CNBP	Myotonic dystrophy 2
chr3	138946020	138946062	GCAGCT	FOXL2	Blepharophimosis, epicanthus inversus, and ptosis
chr3	183712187	183712226	TTTTA	YEATS2	Familial adult myoclonic epilepsy 4
chr4	3074876	3074939	CAG	HTT	Huntington disease
chr4	39348424	39348483	AAAAG	RFC1	Cerebellar ataxia, neuropathy, and vestibular areflexia syndrome
chr4	41745971	41746031	GCC	PHOX2B	Central hypoventilation syndrome
chr4	159342526	159342618	AAAAT	RAPGEF2	Familial adult myoclonic epilepsy 7
chr5	10356339	10356411	AAAAT	MARCHF6	Familial adult myoclonic epilepsy 3
chr5	146878728	146878758	GCT	PPP2R2B	Spinocerebellar ataxia 12
chr6	16327635	16327722	TGC	ATXN1	Spinocerebellar ataxia 1
chr6	45422750	45422801	GGC	RUNX2	Cleidocranial dysplasia
chr6	170561907	170562021	GCA	TBP	Spinocerebellar ataxia 17
chr7	27199924	27199966	GCC	HOXA13	Hand-foot-uterus syndrome
chr8	104588970	104588999	CCG	LRP12	Oculopharyngodistal myopathy 1
chr8	118366815	118366918	AAATA	SAMD12	Familial adult myoclonic epilepsy 1
chr9	27573528	27573546	GCCCCG	C9orf72	Frontotemporal dementia and/or amyotrophic lateral sclerosis 1
chr9	69037286	69037304	GAA	FXN	Friedreich ataxia
chrX	67545317	67545386	GCA	AR	Spinal and bulbar muscular atrophy
chrX	25013649	25013697	GCC	ARX	Epileptic encephalopathy, early infantile, 1
chrX	140504316	140504361	GGC	SOX3	Mental retardation, X-linked
chrX	147912050	147912110	GGC	FMR1	Fragile X-associated tremor/ataxia syndrome
chrX	148500637	148500682	GCC	AFF2	Intellectual developmental disorder, X-linked 109
chrX	71440295	71440888	CCCTCT	TAF1	Dystonia-Parkinsonism, X-linked
