# Supplementary material for: Genome-wide identification of tandem repeats associated with splicing variation across 49 tissues in humans
Source: HighWire-hosted journal article supplement (doi:10.1101/gr.277335.122), 2023-03-01
Supplement: Supplemental_Table_S8.xlsx [file Supplemental_Table_S8.xlsx]

## Sheet: Table S8
Table S8 Spl-TRs responsible for rare diseases
sTR							Associated splicing event
Chr	Start	End	Motif	Gene	Disease		Chr	Sta	End	Gene	GTEx tissue	Nominal p-value	Beta-approximated p-value	Q-value
chr2	190880873	190880920	GCA	GLS	Developmental and epileptic encephalopathy 71		chr2	190653780	190655977	ENSG00000138386.16	Artery_Tibial	2.25793e-07	7.10273e-05	0.000422476
							chr2	190656153	190659158	ENSG00000138386.16	Skin_Sun_Exposed_Lower_leg	1.84013e-06	0.000536094	0.0025149
							chr2	190649982	190659158	ENSG00000138386.16	Thyroid	2.46314e-06	0.00071758	0.00321293
							chr2	190653780	190655977	ENSG00000138386.16	Skin_Not_Sun_Exposed_Suprapubic	5.70006e-06	0.0015965	0.00860092
							chr2	190649360	190659158	ENSG00000138386.16	Adipose_Visceral_Omentum	5.61201e-06	0.00186717	0.0106559
							chr2	190649982	190659158	ENSG00000138386.16	Esophagus_Muscularis	8.69264e-06	0.00259463	0.0132967
							chr2	190362687	190365113	ENSG00000151689.12	Artery_Coronary	6.6322e-06	0.00185276	0.0272687
							chr2	190649982	190659158	ENSG00000138386.16	Pituitary	1.71667e-05	0.00572339	0.0489712
chr5	146878728	146878757	GCT	PPP2R2B	Spinocerebellar ataxia 12		chr5	146878195	146878591	ENSG00000156475.18	Brain_Caudate_basal_ganglia	3.15619e-06	0.00239529	0.0441731
chr19	13207859	13207897	CTG	CACNA1A	Spinocerebellar ataxia 6		chr19	13208053	13208756	ENSG00000141837.19	Brain_Cerebellum	1.5004e-11	1.78462e-08	5.45639e-07
							chr19	13208053	13208756	ENSG00000141837.19	Brain_Cerebellar_Hemisphere	1.29487e-06	0.00191703	0.0243435
							chr19	12954526	12956863	ENSG00000179271.2	Brain_Cerebellum	9.43777e-05	0.0041339	0.0372369
chr19	45770205	45770264	CAG	DMPK	Myotonic dystrophy 1		chr19	45775034	45777667	ENSG00000104936.17	Cells_Cultured_fibroblasts	2.40925e-08	2.61323e-05	0.000152687
							chr19	45770640	45770971	ENSG00000104936.17	Muscle_Skeletal	3.84926e-06	0.00302383	0.0124328
chr20	2652734	2652757	GGCCTG	NOP56	Spinocerebellar ataxia 36		chr20	1888309	1889527	ENSG00000276649.1	Brain_Cerebellum	3.61905e-05	0.00558367	0.0477882
